# Supplementary material for: Porous cross-linked polymer copper and iridium catalyzed the synthesis of quinoxalines and functionalized ketones under solvent-free conditions
Source: Royal Society of Chemistry journal article supplement (doi:10.1039/d1qm00792k), 2021-01-01
Supplement: d1qm00792k1.pdf [file d1qm00792k1.pdf]

*Supporting Information For*

**Porous cross-linked polymer copper and iridium catalyzed the  
synthesis of quinoxalines and functionalized ketones under solvent-  
free conditions †**

Jiahao Li, <sup>a</sup>Minyi Yu, <sup>a</sup>Zheng-Chao Duan, <sup>a,b</sup>Haiyan Zhu, <sup>a</sup>Wei Yao, <sup>a</sup>Dawei Wang\*<sup>a</sup>

<sup>a</sup> *The Key Laboratory of Food Colloids and Biotechnology, Ministry of Education, School of Chemical and Material Engineering, Jiangnan University, Wuxi 214122, China.*

<sup>b</sup> *School of Chemical and Environmental Engineering, Hubei Minzu University, Enshi 445000, China.*

**Contents**

|                                                           |         |
|-----------------------------------------------------------|---------|
| 1. General methods and materials.....                     | S2      |
| 2. Synthesis of PCP-BTA-Cu and PCP-BTA-Ir.....            | S2-S4   |
| 3. Characterization of PCP-BTA-Cu and PCP-BTA-Ir .....    | S4-S6   |
| 4. General procedure for <b>4</b> from diamines.....      | S6      |
| 5. General procedure for <b>4</b> from nitroanilines..... | S6      |
| 6. General procedure for <b>8</b> .....                   | S7      |
| 7. Hammett plot equation.....                             | S7      |
| 8. Reusability of the catalyst.....                       | S8      |
| 9. Analytical data of the obtained compounds.....         | S8-S20  |
| 10. NMR spectra of obtained compounds .....               | S21-S66 |
| 11. References.....                                       | S67     |

## 1. General methods and materials

Unless the special instructions, all the reagents were provided from commercial suppliers and used without further purifications (J&K, Energy Chemical, Acros, TCI, etc.). All the obtained products were characterized by  $^1\text{H-NMR}$ ,  $^{13}\text{C-NMR}$  and referenced to  $\text{DMSO-}d_6$  (2.50 ppm for  $^1\text{H}$ , and 39.5 ppm for  $^{13}\text{C}$ ) or  $\text{CDCl}_3$  (7.26 ppm for  $^1\text{H}$ , and 77.1 ppm for  $^{13}\text{C}$ ) with tetramethylsilane as internal standard (0 ppm).  $^1\text{H-NMR}$  and  $^{13}\text{C-NMR}$  spectra were obtained on Varian 400 or 101 MHz respectively on Bruker Advance III HD 400 MHz spectrometer. Analytical thin layer chromatography (TLC) was performed using commercially prepared 100-400 mesh silica gel plates (SGF254). Flash column chromatography was performed on 230-430 mesh silica gel. High resolution mass spectra (HRMS) were recorded on LTQ-FTUHRA mass spectrometer. GC-MS recorded on GCMS-QP2010Ultra.

## 2. Synthesis of PCP-BTA-Cu and PCP-BTA-Ir

### 2.1 Procedure for synthesis of 1-(6-bromo-2-pyridinyl)-1H-benzotriazole (**1a**)

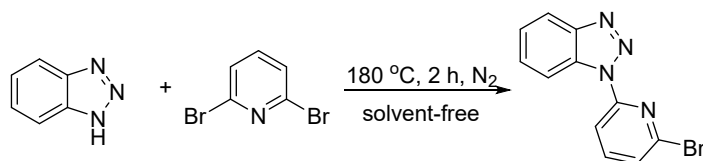

1-(6-Bromo-2-pyridinyl)-1H-benzotriazole (**1a**) was synthesized according to literature<sup>1</sup>. A mixture of benzotriazole (3.570 g, 30.0 mmol) and 2,6-dibromopyridine (4.740 g, 20.0 mmol) was heated to 180 °C under  $\text{N}_2$  and allowed to stir for 2 h. After the reaction mixture was cooled to room temperature, the reaction mixture was added water and extracted with dichloromethane three times. The organic phases were dried over anhydrous  $\text{Na}_2\text{SO}_4$  and concentrated by removing the solvent under vacuum to give a crude product. Finally, the residue was subjected to purification by silica gel column chromatography with eluent petroleum ether/ethyl acetate to afford the desired product (**1a**, 70% yield, 3.861 g, Mp.80.1–82.6 °C).

2.2. Procedure for synthesis of 1-(6-(4-vinylphenyl)pyridin-2-yl)-1H-benzo[d][1,2,3]triazole (**1b**).

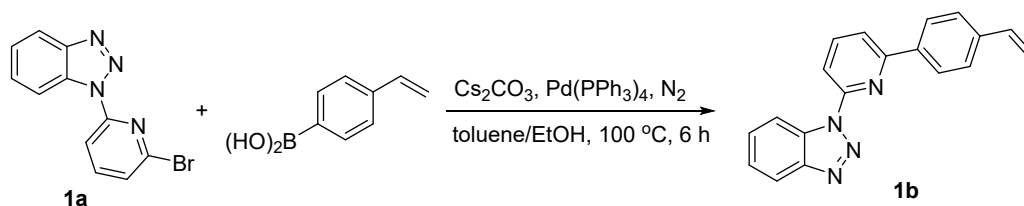

1-(6-(4-vinylphenyl) pyridin-2-yl)-1*H*-benzo[d] [1,2,3] triazole (**1b**) was synthesized according to literature.<sup>2</sup> A mixture of triazole intermediate (**1a**, 1.38 g, 5 mmol), 4-vinylbenzyl boronic acid (1.030 g, 7 mmol) and  $\text{Cs}_2\text{CO}_3$  (2.600 g, 8 mmol) were dissolved in solvent mixture of toluene/EtOH (10:1 mixture, 40 mL) and  $\text{Pd}(\text{PPh}_3)_4$  (0.290 g, 0.25 mmol) was added subsequently. The resulting mixture was stirred at  $100\text{ }^\circ\text{C}$  for 6 hours under  $\text{N}_2$  atmosphere. After the reaction mixture was cooled to room temperature, the reaction mixture was added water and extracted with ethyl acetate three times. The organic phases were dried over anhydrous  $\text{MgSO}_4$  and concentrated by removing the solvent under vacuum to give a crude product. The crude product was purified by column chromatography, eluting with petroleum ether/ethyl acetate to afford the desired product (**1b**, 80% yield, 1.190 g, Mp.166.5-168.3  $^\circ\text{C}$ ).

### 1-(6-(4-vinylphenyl) pyridin-2-yl)-1*H*-benzo[d] [1,2,3] triazole (**1b**)

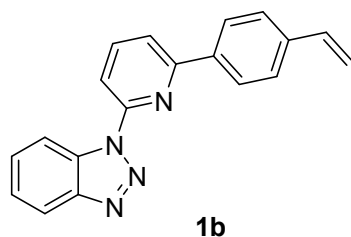

White solid, Mp.166.5-168.3  $^\circ\text{C}$ , 80% yield;  $^1\text{H}$  NMR (400 MHz,  $\text{CDCl}_3$ )  $\delta$  8.78 (d,  $J = 8.4$  Hz, 1H), 8.25 (d,  $J = 8.1$  Hz, 1H), 8.17 (d,  $J = 8.3$  Hz, 1H), 8.10 (d,  $J = 8.3$  Hz, 2H), 8.00 (t,  $J = 7.9$  Hz, 1H), 7.77 (d,  $J = 7.7$  Hz, 1H), 7.64 (dd,  $J = 15.5, 8.0$  Hz, 3H), 7.50 (t,  $J = 7.5$  Hz, 1H), 6.83 (dd,  $J = 17.6, 10.9$  Hz, 1H), 5.90 (d,  $J = 17.6$  Hz, 1H), 5.38 (d,  $J = 10.9$  Hz, 1H).  $^{13}\text{C}$  NMR (101 MHz,  $\text{CDCl}_3$ )  $\delta$  156.09, 151.54, 146.81, 139.70, 138.83, 137.65, 136.22, 131.53, 128.89, 127.14, 126.85, 124.94, 119.92, 118.58, 115.08, 114.80, 112.71. HRMS Calculated for  $\text{C}_{19}\text{H}_{15}\text{N}_4$   $[\text{M}+\text{H}]^+$  299.1297, found 299.1293.

### 2.3 Procedure for synthesis of PCP-BTA

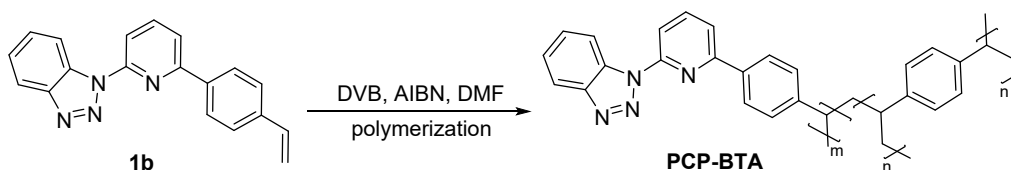

The polymer monomer **1b** (0.500 g) and Divinylbenzene (DVB, 2.000 g) were dissolved in DMF (20 mL), followed by the addition of 2,2'-azobis (2-methylpropionitrile) (AIBN, 0.050 g). After stirring for 2 h at room temperature, the solution was transferred into an autoclave for 24 h at 100 °C. Subsequently, the mixture solution was cooled to room temperature and the obtained solid was washed three times with anhydrous ethanol, a white solid product was obtained, which was **PCP-BTA**.

#### 2.4.1 Procedure for synthesis of **PCP-BTA-Cu**

Under N<sub>2</sub> atmosphere, **PCP-BTA** (1.000 g), Cu(CH<sub>3</sub>COOH)<sub>2</sub>·H<sub>2</sub>O (200 mg) and dry DMF (20 mL) was added to 50 mL Schlenk tube. Then, the resulting mixture was stirred at 70 °C for 12 h. After cooling down to room temperature centrifugation, washing with water three times, and drying at 80°C, the dark green solid was obtained, which was denoted as **PCP-BTA-Cu**.

#### 2.4.2 Procedure for synthesis of **PCP-BTA-Ir**

Under N<sub>2</sub> atmosphere, **PCP-BTA** (1.000 g), [Cp\*IrCl<sub>2</sub>]<sub>2</sub> (200 mg) and dry methanol (20 mL) was added to 50 mL Schlenk tube. Then, the resulting mixture was stirred at 60°C for 12 h. After cooling down to room temperature centrifugation, washing with methanol three times, and drying at 75 °C, the yellow solid was obtained, which was denoted as **PCP-BTA-Ir**.

### 3. Characterization of **PCP-BTA-Cu** and **PCP-BTA-Ir**

Fig.S1 showed SEM and TEM images of PCP-BTA-Cu, PCP-BTA-Ir after five runs.

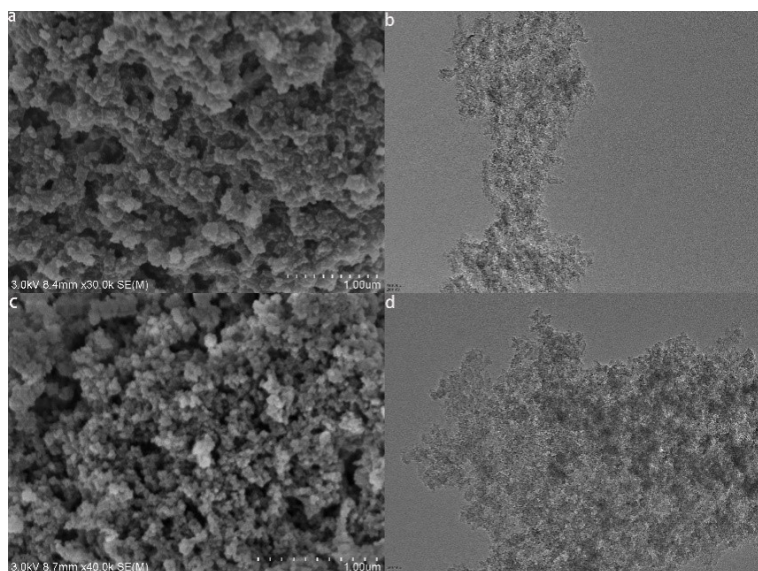

**Fig.S1.** (a) SEM images of PCP-BTA-Cu after five runs, (b) TEM images of PCP-BTA-Cu after five runs, (c) SEM images of PCP-BTA-Ir after five runs, (d) TEM images of PCP-BTA-Ir after five runs.



Fig.S2 showed SEM EDS image of PCP-BTA-Cu (a), (b), and corresponding elemental mapping images of (c) C, (d) N, (e) Cu, (f) O, which revealed cooper complex was supported on PCP-BTA successfully.

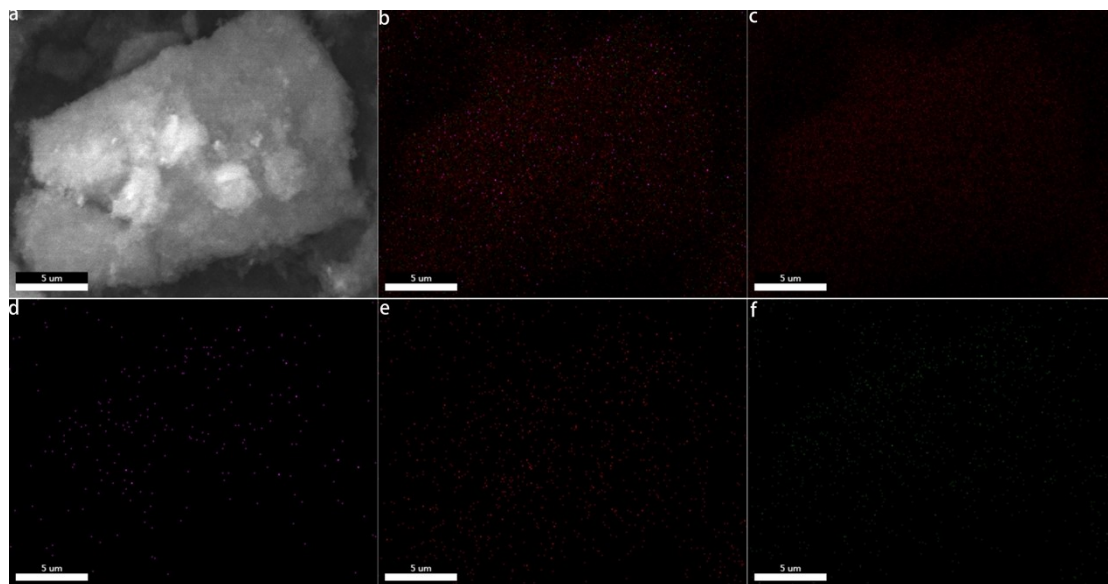

**Fig.S2.** SEM EDS image of PCP-BTA-Cu (a), (b), and corresponding elemental mapping images of (c) C, (d) N, (e) Cu, (f) O.

Fig.S3 showed SEM EDS image of PCP-BTA-Ir (a), (b), and corresponding elemental mapping images of (c) C, (d) N, (e) Ir, (f) Cl, which revealed iridium complex was supported on PCP-BTA successfully.

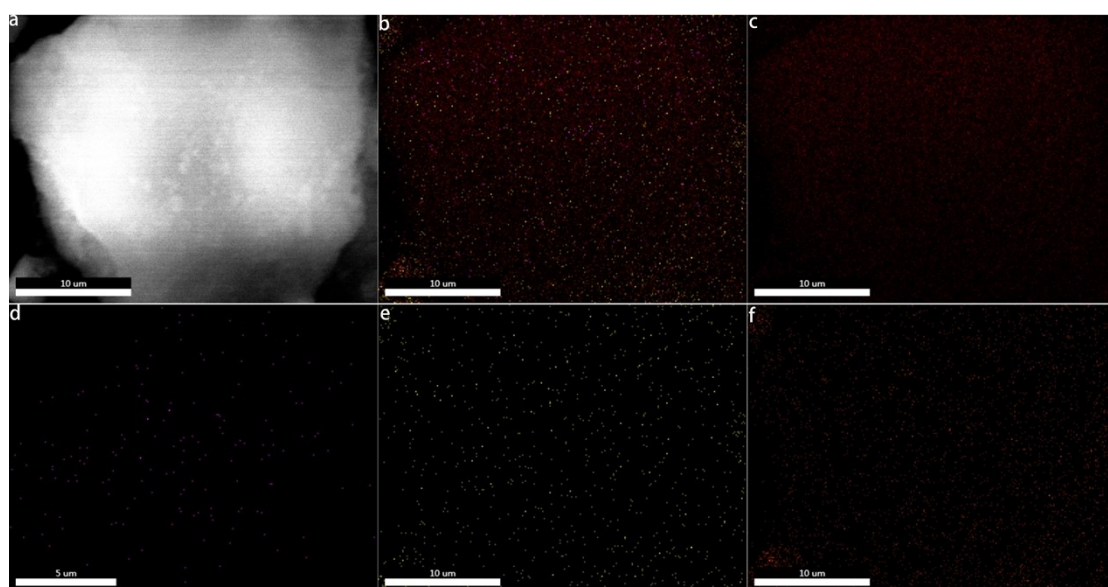

**Fig.S3.** SEM EDS image of PCP-BTA-Ir (a), (b), and corresponding elemental mapping images of (c) C, (d) N, (e) Ir, (f) Cl.

**Table.S1.** Quantitative elemental composition of C, O, N and Cu from the PCP-BTA-Cu XPS data.

| Name  | Start (BE) | Peak (BE) | End (BE) | Height (CPS) | FWHM (eV) | Area (P) CPS. (eV) | Area (N) TPP- 2M | Atomic (%) |
|-------|------------|-----------|----------|--------------|-----------|--------------------|------------------|------------|
| N 1s  | 408        | 398.39    | 394      | 1365.59      | 1.62      | 3463.98            | 31.27            | 2.08       |
| Cu 2p | 967.63     | 932.78    | 929      | 2486.65      | 3.34      | 20790.11           | 19.54            | 1.3        |
| O 1s  | 540        | 531.44    | 526      | 2152.85      | 2.86      | 8187.33            | 47.48            | 3.16       |
| C 1s  | 296        | 283.99    | 281      | 54853.37     | 1.56      | 100163.22          | 1403.8           | 93.46      |

**Table.S2.** Quantitative elemental composition of C, Ir, N and Cl from the PCP-BTA-Ir XPS data.

| Name  | Start (BE) | Peak (BE) | End (BE) | Height (CPS) | FWHM (eV) | Area (P) CPS.(eV) | Area (N) TPP- 2M | Atomic (%) |
|-------|------------|-----------|----------|--------------|-----------|-------------------|------------------|------------|
| Ir 4f | 72.58      | 62.65     | 56.78    | 1627.32      | 1.78      | 5656.54           | 0.01             | 0.55       |
| Cl 2p | 210.58     | 198.89    | 190.78   | 822.88       | 3.02      | 3032.98           | 0.02             | 1.54       |
| C 1s  | 296.58     | 284.77    | 279.78   | 35275.94     | 1.63      | 66563.14          | 1.52             | 94.19      |
| N 1s  | 410.58     | 399.15    | 392.78   | 965.46       | 1.53      | 4286.15           | 0.06             | 3.72       |

#### 4. General procedure for 4 from diamines

To 25 mL pressure tube was added 1,2-diamine (1.0 mmol), vicinal diol (2.5 mmol), PCP-BTA-Cu (15 mg), CsOH·H<sub>2</sub>O (0.75 equiv.). Then, the pressure tube was placed in oil bath (150 °C) for 12 h. After the reaction mixture was cooled to room temperature, the reaction mixture was added water and extracted with ethyl acetate three times. The organic phases were dried over anhydrous MgSO<sub>4</sub> and concentrated by removing the solvent under vacuum to give a crude product. The crude product was purified by column chromatography, eluting with petroleum ether/ethyl acetate to afford the desired product 4.

#### 5. General procedure for 4 from nitroanilines

To 25 mL pressure tube was added 2-nitroaniline (1.0 mmol), vicinal diol (3.0 mmol), PCP-BTA-Cu (15 mg), CsOH·H<sub>2</sub>O (0.75 equiv.). Then, the pressure tube was placed in oil bath (150 °C) for 12 h. After the reaction mixture was cooled to room temperature, the reaction mixture was added water and extracted with ethyl acetate three times. The organic phases were dried over anhydrous MgSO<sub>4</sub> and concentrated by removing the solvent under vacuum to give a crude product. The crude product was purified by column chromatography, eluting with petroleum ether/ethyl acetate to afford the desired product 4.

#### 6. General procedure for 8

To 25 mL reaction tube was added secondary alcohol (1.0 mmol), primary alcohol (3.0 mmol), PCP-BTA-Ir (15 mg), KOH (0.5 equiv.). Then, the mixture was heated at 100 °C for 12 h. After the reaction mixture was cooled to room temperature, the reaction mixture was added water and extracted with ethyl acetate three times. The organic phases were dried over anhydrous MgSO<sub>4</sub> and concentrated by removing the solvent under vacuum to give a crude product. The crude product was purified by column chromatography, eluting with petroleum ether/ethyl acetate to afford the desired product **8**. Please see Table S3 for the optimization of reaction conditions.

**Table S3.** Optimization of reaction conditions. <sup>a</sup>

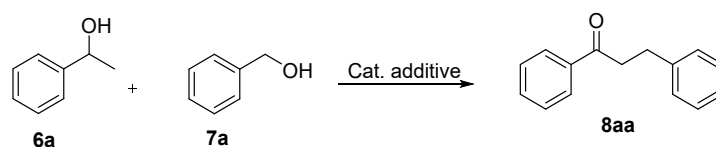

| Entry    | Catalyst          | Base                           | Time [h]  | Solvent          | Temperature [ °C ] | Yield [%] <sup>b</sup> |
|----------|-------------------|--------------------------------|-----------|------------------|--------------------|------------------------|
| 1        | —                 | KOH                            | 12        | toluene          | 100                | 15                     |
| 2        | PCP-BTA-Ir        | KOH                            | 12        | toluene          | 100                | 88                     |
| <b>3</b> | <b>PCP-BTA-Ir</b> | <b>KOH</b>                     | <b>12</b> | -                | <b>100</b>         | <b>92</b>              |
| 4        | PCP-BTA-Ir        | K <sub>2</sub> CO <sub>3</sub> | 12        | toluene          | 100                | 25                     |
| 5        | PCP-BTA-Ir        | NaOH                           | 12        | toluene          | 100                | 80                     |
| 6        | PCP-BTA-Ir        | KOtBu                          | 12        | toluene          | 100                | 45                     |
| 7        | PCP-BTA-Ir        | CsOH·H <sub>2</sub> O          | 12        | toluene          | 100                | 81                     |
| 8        | PCP-BTA-Ir        | KOH                            | 12        | H <sub>2</sub> O | 100                | 10                     |
| 9        | PCP-BTA-Ir        | KOH                            | 12        | 1,4-dioxane      | 100                | 75                     |
| 10       | PCP-BTA-Ir        | KOH                            | 12        | -                | 130                | 91                     |
| 11       | PCP-BTA-Ir        | KOH                            | 12        | -                | 90                 | 87                     |
| 12       | PCP-BTA-Ir        | KOH                            | 8         | -                | 100                | 84                     |
| 13       | PCP-BTA-Ir        | KOH                            | 16        | -                | 100                | 92                     |

<sup>a</sup> Reagents and conditions: **6a** (1.0 mmol), **7a** (3.0 mmol), KOH (0.5 mmol), PCP-BTA-Ir (15 mg), 100 °C, 12 h. <sup>b</sup> Yields of isolated product.

## 7. Hammett plot equation

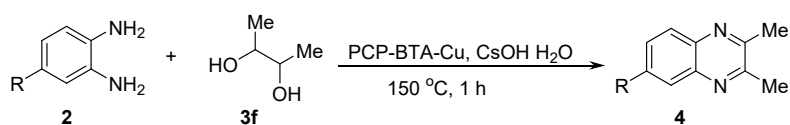

**Experimental procedure:** To 25 mL pressure tube was added 1,2-diamine (1.0 mmol), 2,3-butanediol (**3f**, 2.5 mmol), PCP-BTA-Cu (15 mg), CsOH·H<sub>2</sub>O (0.75 equiv.). Then, the pressure

tube was heated at 150 °C for 1 h. After centrifugation and recycle the catalyst, the water mixture was extracted with ethyl acetate three times. Next, the yield of product **4** was determined by GC.

| R     | OMe | Me  | H   | F  | Cl |
|-------|-----|-----|-----|----|----|
| Yield | 22% | 18% | 14% | 8% | 6% |

## 8. Reusability of the catalyst

To 25 mL pressure tube was added *o*-phenylenediamine (1.0 mmol), 1,2-propanediol (2.5 mmol), PCP-BTA-Cu (15 mg), CsOH·H<sub>2</sub>O (0.75 equiv.) and NaOAc (0.2 equiv.). Then, the pressure tube was placed in oil bath (150 °C) for 12 h. After the reaction mixture was cooled to room temperature, the catalyst was separated by centrifugation with ethyl acetate, washed with methanol and ethanol, dried in a vacuum, and reused for the next time.

## 9. Analytical data of the obtained compounds

### 1-(6-(4-vinylphenyl) pyridin-2-yl)-1*H*-benzo[d][1,2,3] triazole (**1b**)

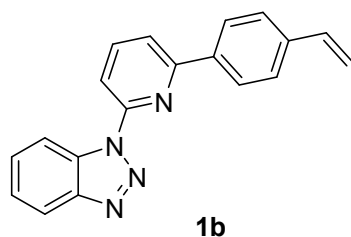

White solid, Mp.166.5-168.3 °C, 80% yield; <sup>1</sup>H NMR (400 MHz, CDCl<sub>3</sub>) δ 8.78 (d, *J* = 8.4 Hz, 1H), 8.25 (d, *J* = 8.1 Hz, 1H), 8.17 (d, *J* = 8.3 Hz, 1H), 8.10 (d, *J* = 8.3 Hz, 2H), 8.00 (t, *J* = 7.9 Hz, 1H), 7.77 (d, *J* = 7.7 Hz, 1H), 7.64 (dd, *J* = 15.5, 8.0 Hz, 3H), 7.50 (t, *J* = 7.5 Hz, 1H), 6.83 (dd, *J* = 17.6, 10.9 Hz, 1H), 5.90 (d, *J* = 17.6 Hz, 1H), 5.38 (d, *J* = 10.9 Hz, 1H). <sup>13</sup>C NMR (101 MHz, CDCl<sub>3</sub>) δ 156.09, 151.54, 146.81, 139.70, 138.83, 137.65, 136.22, 131.53, 128.89, 127.14, 126.85, 124.94, 119.92, 118.58, 115.08, 114.80, 112.71. HRMS Calculated for C<sub>19</sub>H<sub>15</sub>N<sub>4</sub> [M+H]<sup>+</sup> 299.1297, found 299.1293.

### (1) 2-methylquinoxaline (**4aa**)<sup>3</sup>.

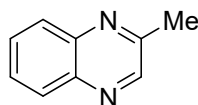

Yellow liquid, 90% from diamine, 91% from nitroaniline; <sup>1</sup>H NMR (400 MHz, CDCl<sub>3</sub>) δ 8.72 (s, 1H), 8.05 (d, *J* = 7.7 Hz, 1H), 8.00 (d, *J* = 8.1 Hz, 1H), 7.74 – 7.65 (m, 2H), 2.75 (s, 3H). <sup>13</sup>C NMR (101 MHz, CDCl<sub>3</sub>) δ 153.76, 145.99, 142.04, 140.94, 130.00, 129.15, 128.91, 128.64, 22.57.

### (2) 2-ethylquinoxaline (**4ab**)<sup>3</sup>.

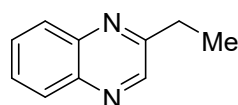

Yellow liquid, 88% from diamine, 89% from nitroaniline;  $^1\text{H}$  NMR (400 MHz,  $\text{CDCl}_3$ )  $\delta$  8.64 (s, 1H), 7.97 – 7.91 (m, 2H), 7.59 (ddd,  $J = 9.6, 7.8, 1.6$  Hz, 2H), 2.93 (q,  $J = 7.6$  Hz, 2H), 1.32 (t,  $J = 7.6$  Hz, 3H).  $^{13}\text{C}$  NMR (101 MHz,  $\text{CDCl}_3$ )  $\delta$  158.38, 145.51, 142.08, 141.16, 129.84, 129.11, 128.83, 128.80, 29.56, 13.35.

**(3) 2-propylquinoxaline (4ac)** <sup>4</sup>.

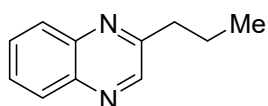

Yellow liquid, 80% from diamine, 83% from nitroaniline;  $^1\text{H}$  NMR (400 MHz,  $\text{CDCl}_3$ )  $\delta$  8.76 (s, 1H), 8.12 – 8.04 (m, 2H), 7.79 – 7.68 (m, 2H), 3.05 – 2.98 (m, 2H), 1.91 (h,  $J = 7.4$  Hz, 2H), 1.06 (t,  $J = 7.4$  Hz, 3H).  $^{13}\text{C}$  NMR (101 MHz,  $\text{CDCl}_3$ )  $\delta$  157.48, 145.85, 142.19, 141.23, 129.94, 129.17, 128.94, 128.85, 38.42, 22.85, 13.93.

**(4) 2-butylquinoxaline (4ad)** <sup>3</sup>.

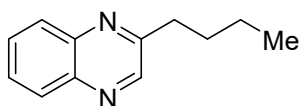

Yellow dense liquid, 77% from diamine, 79% from nitroaniline;  $^1\text{H}$  NMR (400 MHz,  $\text{CDCl}_3$ )  $\delta$  8.77 (s, 1H), 8.14 – 8.04 (m, 2H), 7.81 – 7.68 (m, 2H), 3.09 – 3.00 (m, 2H), 1.86 (t,  $J = 7.7$  Hz, 2H), 1.49 (q,  $J = 7.5$  Hz, 2H), 1.00 (t,  $J = 7.4$  Hz, 3H).  $^{13}\text{C}$  NMR (101 MHz,  $\text{CDCl}_3$ )  $\delta$  157.70, 145.84, 142.14, 141.20, 129.98, 129.16, 128.96, 128.81, 36.24, 31.66, 22.59, 13.90.

**(5) 2-phenylquinoxaline (4ae)** <sup>3</sup>.

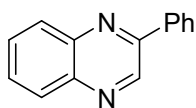

Yellow dense liquid, 86% from diamine, 82% from nitroaniline;  $^1\text{H}$  NMR (400 MHz,  $\text{CDCl}_3$ )  $\delta$  9.36 (s, 1H), 8.30 – 8.10 (m, 4H), 7.86 – 7.74 (m, 2H), 7.63 – 7.51 (m, 3H).  $^{13}\text{C}$  NMR (101 MHz,  $\text{CDCl}_3$ )  $\delta$  151.89, 143.36, 142.33, 141.57, 136.79, 130.33, 130.22, 129.65, 129.59, 129.19, 129.13, 127.58.

**(6) 2,3-dimethylquinoxaline (4af)** <sup>3</sup>.

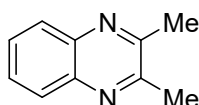

Yellow solid, Mp.104.2-106.8 °C, 85% from diamine, 92% from nitroaniline;  $^1\text{H}$  NMR (400 MHz,

CDCl<sub>3</sub>)  $\delta$  7.99 (dd,  $J = 6.3, 3.5$  Hz, 2H), 7.67 (dd,  $J = 6.4, 3.4$  Hz, 2H), 2.74 (s, 6H). <sup>13</sup>C NMR (101 MHz, CDCl<sub>3</sub>)  $\delta$  153.41, 141.04, 128.78, 128.28, 23.14.

**(7) 1,2,3,4-tetrahydrophenazine (4ag)**<sup>5</sup>.

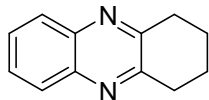

Yellow solid, Mp.91.9-93.3 °C, 92% from diamine, 80% from nitroaniline; <sup>1</sup>H NMR (400 MHz, CDCl<sub>3</sub>)  $\delta$  7.98 (dd,  $J = 6.3, 3.5$  Hz, 2H), 7.67 (dd,  $J = 6.4, 3.4$  Hz, 2H), 3.22 – 3.13 (m, 4H), 2.05 (p,  $J = 3.3$  Hz, 4H). <sup>13</sup>C NMR (101 MHz, CDCl<sub>3</sub>)  $\delta$  154.14, 141.19, 128.93, 128.32, 33.19, 22.79.

**(8) 2,6-dimethylquinoxaline and 2,7-dimethylquinoxaline (4ah)**<sup>3</sup>.

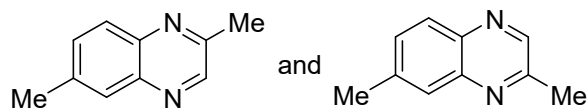

Yellow solid, the two regio-isomers were inseparable in column chromatography. 83% isolated yield from diamine; <sup>1</sup>H NMR (400 MHz, CDCl<sub>3</sub>)  $\delta$  8.68 (d,  $J = 10.3$  Hz, 1H), 7.96 – 7.88 (m, 1H), 7.84 – 7.75 (m, 1H), 7.54 (ddd,  $J = 15.4, 8.6, 2.0$  Hz, 1H), 2.75 (s, 3H), 2.57 (s, 3H). <sup>13</sup>C NMR (101 MHz, CDCl<sub>3</sub>)  $\delta$  153.61, 152.76, 145.87, 145.08, 142.07, 141.00, 140.55, 140.47, 139.43, 139.33, 132.28, 131.20, 128.65, 128.13, 128.02, 127.52, 22.52, 22.42, 21.84, 21.68.

**(9) 6-methyl-2-phenylquinoxaline and 7-methyl-2-phenylquinoxaline (4ai)**<sup>3</sup>.

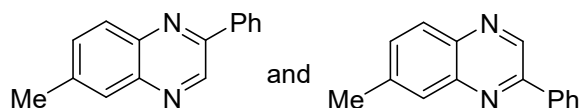

Yellow solid, the two regio-isomers were inseparable in column chromatography. 83% isolated yield from diamine; <sup>1</sup>H NMR (400 MHz, CDCl<sub>3</sub>)  $\delta$  9.29 (d,  $J = 9.8$  Hz, 1H), 8.20 (dd,  $J = 7.3, 1.7$  Hz, 2H), 8.04 (dd,  $J = 16.2, 8.6$  Hz, 1H), 7.97 – 7.89 (m, 1H), 7.66 – 7.50 (m, 4H), 2.63 (s, 3H). <sup>13</sup>C NMR (101 MHz, CDCl<sub>3</sub>)  $\delta$  151.81, 151.10, 143.26, 142.48, 142.40, 141.64, 140.87, 140.79, 140.17, 136.97, 132.65, 131.91, 130.08, 129.99, 129.14, 128.62, 128.48, 127.97, 127.53, 127.44, 21.89, 21.86.

**(10) 2,3,6-trimethylquinoxaline (4aj)**<sup>3</sup>.

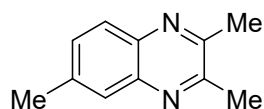

Yellow solid, Mp.92.3-94.9 °C, 86% from diamine, 87% from nitroaniline; <sup>1</sup>H NMR (400 MHz, CDCl<sub>3</sub>) δ 7.86 (d, *J* = 8.5 Hz, 1H), 7.75 (s, 1H), 7.49 (dd, *J* = 8.5, 1.9 Hz, 1H), 2.71 (s, 6H), 2.55 (s, 3H). <sup>13</sup>C NMR (101 MHz, CDCl<sub>3</sub>) δ 153.28, 152.42, 141.09, 139.45, 139.14, 131.03, 127.79, 127.26, 23.14, 23.04, 21.73.

**(11) 7-methyl-1,2,3,4-tetrahydrophenazine (4ak)**<sup>5</sup>.

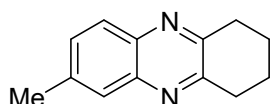

Yellow solid, Mp.80.5.3-82.1 °C, 78% from diamine, 73% from nitroaniline; <sup>1</sup>H NMR (400 MHz, CDCl<sub>3</sub>) δ 7.84 (d, *J* = 8.5 Hz, 1H), 7.72 (s, 1H), 7.48 (dd, *J* = 8.5, 2.0 Hz, 1H), 3.12 (d, *J* = 6.0 Hz, 4H), 2.55 (s, 3H), 2.02 (p, *J* = 3.4 Hz, 4H). <sup>13</sup>C NMR (101 MHz, CDCl<sub>3</sub>) δ 153.91, 153.06, 143.44, 139.63, 138.75, 130.17, 127.81, 126.57, 33.16, 33.06, 22.84, 22.82, 21.75.

**(12) 2,6,7-trimethylquinoxaline (4al)**<sup>3</sup>.

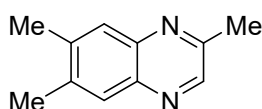

Yellow solid, Mp.115.9-117.2 °C, 86% from diamine, 86% from nitroaniline; <sup>1</sup>H NMR (400 MHz, CDCl<sub>3</sub>) δ 8.54 (s, 1H), 7.69 (s, 1H), 7.64 (s, 1H), 2.64 (s, 3H), 2.36 (s, 6H). <sup>13</sup>C NMR (101 MHz, CDCl<sub>3</sub>) δ 152.56, 144.91, 140.87, 140.30, 139.80, 139.10, 128.10, 127.65, 22.36, 20.27, 20.11.

**(13) 2-ethyl-6,7-dimethylquinoxaline (4am)**<sup>5</sup>.

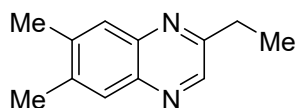

Yellow solid, Mp.115.2-116.8 °C, 74% from diamine, 77% from nitroaniline; <sup>1</sup>H NMR (400 MHz, CDCl<sub>3</sub>) δ 8.66 (s, 1H), 7.80 (d, *J* = 6.9 Hz, 2H), 3.02 (q, *J* = 7.6 Hz, 2H), 2.49 (s, 6H), 1.43 (t, *J* = 7.6 Hz, 3H). <sup>13</sup>C NMR (101 MHz, CDCl<sub>3</sub>) δ 157.46, 144.53, 141.05, 140.37, 140.16, 139.24, 128.18, 127.93, 29.52, 20.34, 20.21, 13.53.

**(14) 2,3,6,7-tetramethylquinoxaline (4an)**<sup>5</sup>.

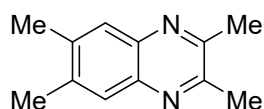

Yellow solid, Mp.181.1-183.7 °C, 88% from diamine, 88% from nitroaniline; <sup>1</sup>H NMR (400 MHz, CDCl<sub>3</sub>) δ 7.72 (s, 2H), 2.70 (s, 6H), 2.46 (s, 6H). <sup>13</sup>C NMR (101 MHz, CDCl<sub>3</sub>) δ 152.32, 139.95, 139.05, 127.46, 23.05, 20.25.

**(15) 7,8-dimethyl-1,2,3,4-tetrahydrophenazine (4ao)**<sup>6</sup>.

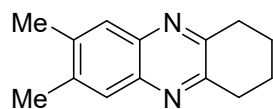

Yellow solid, Mp.147.2-148.2 °C, 80% from diamine, 70% from nitroaniline; <sup>1</sup>H NMR (400 MHz, CDCl<sub>3</sub>) δ 7.70 (s, 2H), 3.16 – 3.09 (m, 4H), 2.45 (s, 6H), 2.02 (p, *J* = 3.2 Hz, 4H). <sup>13</sup>C NMR (101 MHz, CDCl<sub>3</sub>) δ 152.93, 140.12, 139.22, 127.39, 33.06, 22.88, 20.28.

**(16) 6,7-dimethyl-2-phenylquinoxaline (4ap)**<sup>3</sup>.

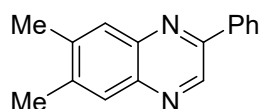

Yellow solid, Mp.121.3-123.1 °C, 85% from diamine, 80% from nitroaniline; <sup>1</sup>H NMR (400 MHz, CDCl<sub>3</sub>) δ 9.15 (s, 1H), 8.13 – 8.06 (m, 2H), 7.84 (s, 1H), 7.78 (s, 1H), 7.51 – 7.43 (m, 3H), 2.44 (s, 6H). <sup>13</sup>C NMR (101 MHz, CDCl<sub>3</sub>) δ 151.06, 142.39, 141.26, 140.91, 140.50, 140.24, 137.12, 129.89, 129.12, 128.66, 128.11, 127.42, 20.44, 20.40.

**(17) 6-(tert-butyl)-2-methylquinoxaline and 7-(tert-butyl)-2-methylquinoxaline (4aq)**<sup>5</sup>.

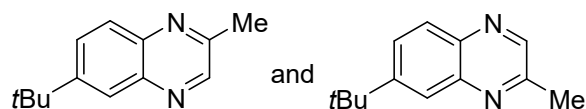

Yellow solid, the two regio-isomers were inseparable in column chromatography, 65% isolated yield from diamine; <sup>1</sup>H NMR (400 MHz, CDCl<sub>3</sub>) δ 8.70 (d, *J* = 8.0 Hz, 1H), 8.03 – 7.94 (m, 2H), 7.86 – 7.78 (m, 1H), 2.76 (d, *J* = 2.1 Hz, 3H), 1.44 (s, 9H). <sup>13</sup>C NMR (101 MHz, CDCl<sub>3</sub>) δ 153.57, 153.55, 153.02, 152.36, 145.81, 145.30, 144.87, 144.32, 141.92, 140.86, 140.40, 139.36, 128.98, 128.44, 127.93, 127.89, 124.36, 123.91, 35.24, 35.11, 31.11, 22.52, 22.44.

**(18) 6-(tert-butyl)-2,3-dimethylquinoxaline (4ar)**<sup>5</sup>.

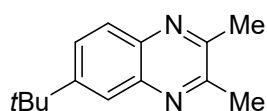



Yellow solid, Mp.52.4-53.8 °C, 70% from diamine; <sup>1</sup>H NMR (400 MHz, CDCl<sub>3</sub>) δ 7.94 (d, *J* = 2.2 Hz, 1H), 7.91 (d, *J* = 8.8 Hz, 1H), 7.76 (dd, *J* = 8.8, 2.2 Hz, 1H), 2.71 (d, *J* = 1.9 Hz, 6H), 1.43 (s, 9H). <sup>13</sup>C NMR (101 MHz, CDCl<sub>3</sub>) δ 153.20, 152.67, 152.23, 140.89, 139.38, 127.68, 127.60, 123.63, 35.11, 31.18, 23.14, 23.07.

**(19) 7-methoxy-1,2,3,4-tetrahydrophenazine (4as)**<sup>5</sup>.

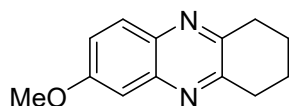

Yellow solid, Mp.114.9-115.3 °C, 86% from diamine; <sup>1</sup>H NMR (400 MHz, CDCl<sub>3</sub>) δ 7.82 (d, *J* = 9.0 Hz, 1H), 7.29 (dd, *J* = 9.2, 2.8 Hz, 1H), 7.24 (d, *J* = 2.8 Hz, 1H), 3.92 (s, 3H), 3.11 (d, *J* = 4.6 Hz, 4H), 2.03 – 1.98 (m, 4H). <sup>13</sup>C NMR (101 MHz, CDCl<sub>3</sub>) δ 159.89, 153.77, 151.12, 142.46, 137.13, 129.17, 121.96, 105.75, 55.56, 33.02, 32.72, 22.82, 22.75.

**(20) 6-methoxy-2-phenylquinoxaline and 7-methoxy-2-phenylquinoxaline (4at)**<sup>3</sup>.

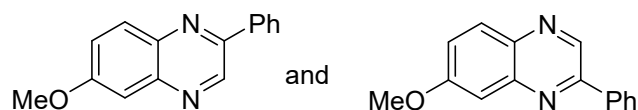

Yellow solid, the two regio-isomers were inseparable in column chromatography, 77% isolated yield from diamine; <sup>1</sup>H NMR (400 MHz, CDCl<sub>3</sub>) δ 9.12 (s, 1H), 8.17 – 8.11 (m, 2H), 7.96 (d, *J* = 9.2 Hz, 1H), 7.57 – 7.49 (m, 3H), 7.40 (dd, *J* = 14.6, 2.8 Hz, 2H), 3.96 (s, 3H). <sup>13</sup>C NMR (101 MHz, CDCl<sub>3</sub>) δ 161.08, 151.95, 143.98, 140.74, 137.75, 136.98, 130.02, 129.15, 128.46, 127.54, 122.95, 106.87, 55.86.

**(21) 6-methoxy-2,3-dimethylquinoxaline (4au)**<sup>3</sup>.

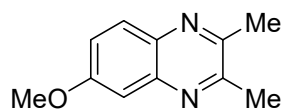

Yellow solid, Mp.99.3-100.9 °C, 89% from diamine; <sup>1</sup>H NMR (400 MHz, CDCl<sub>3</sub>) δ 7.87 (d, *J* = 8.8 Hz, 1H), 7.35 – 7.27 (m, 2H), 3.95 (s, 3H), 2.72 (s, 3H), 2.70 (s, 3H). <sup>13</sup>C NMR (101 MHz, CDCl<sub>3</sub>) δ 159.97, 153.36, 150.64, 142.43, 136.99, 129.24, 121.70, 106.15, 55.69, 23.10, 22.80.

**(22) 7-chloro-1,2,3,4-tetrahydrophenazine (4av)**<sup>6</sup>.

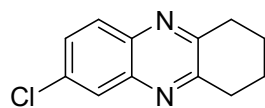

Yellow dense liquid, 78% from diamine, 82% from nitroaniline;  $^1\text{H}$  NMR (400 MHz,  $\text{CDCl}_3$ )  $\delta$  7.90 (d,  $J = 2.3$  Hz, 1H), 7.84 (d,  $J = 8.9$  Hz, 1H), 7.54 (dd,  $J = 8.9, 2.3$  Hz, 1H), 3.09 (td,  $J = 4.7, 2.3$  Hz, 4H), 2.00 – 1.95 (m, 4H).  $^{13}\text{C}$  NMR (101 MHz,  $\text{CDCl}_3$ )  $\delta$  155.26, 154.46, 141.44, 139.63, 134.64, 130.00, 129.55, 127.30, 33.17, 33.11, 22.67, 22.65.

**(23) 6-chloro-2,3-dimethylquinoxaline (4aw)**<sup>5</sup>.

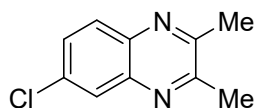

Yellow solid, Mp.91.0-92.5 °C, 78% from diamine, 75% from nitroaniline;  $^1\text{H}$  NMR (400 MHz,  $\text{CDCl}_3$ )  $\delta$  7.84 (d,  $J = 2.3$  Hz, 1H), 7.78 (d,  $J = 8.9$  Hz, 1H), 7.49 (dd,  $J = 8.9, 2.3$  Hz, 1H), 2.61 (s, 3H), 2.61 (s, 3H).  $^{13}\text{C}$  NMR (101 MHz,  $\text{CDCl}_3$ )  $\delta$  153.48, 152.68, 140.26, 138.44, 133.29, 128.67, 128.49, 126.27, 22.15, 22.09.

**(24) 6-fluoro-2,3-dimethylquinoxaline (4ax)**<sup>6</sup>.

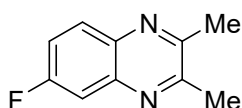

Yellow solid, Mp.108.2-110.3 °C, 70% from diamine, 74% from nitroaniline;  $^1\text{H}$  NMR (400 MHz,  $\text{CDCl}_3$ )  $\delta$  7.95 (dd,  $J = 9.2, 5.7$  Hz, 1H), 7.59 (dd,  $J = 9.3, 2.8$  Hz, 1H), 7.46 – 7.39 (m, 1H), 2.71 (d,  $J = 3.1$  Hz, 6H).  $^{13}\text{C}$  NMR (101 MHz,  $\text{CDCl}_3$ )  $\delta$  162.07 (d,  $J = 249.8$  Hz), 154.41, 152.73 (d,  $J = 3.0$  Hz), 141.71 (d,  $J = 12.9$  Hz), 138.17, 130.23 (d,  $J = 10.1$  Hz), 118.84 (d,  $J = 25.6$  Hz), 111.99 (d,  $J = 21.5$  Hz), 23.13, 22.97.  $^{19}\text{F}$  NMR (376 MHz,  $\text{CDCl}_3$ )  $\delta$  -110.26.

**(25) 6-bromo-8-methyl-2-phenylquinoxaline and 7-bromo-5-methyl-2-phenylquinoxaline (4ba)**<sup>5</sup>.

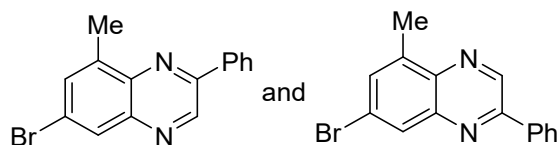

Yellow solid, the two regio-isomers were inseparable in column chromatography, 85% from nitroaniline;  $^1\text{H}$  NMR (400 MHz,  $\text{CDCl}_3$ )  $\delta$  9.28 (s, 1H), 8.27 – 7.96 (m, 3H), 7.66 (d,  $J = 17.6$  Hz, 1H), 7.59 – 7.48 (m, 3H), 2.79 (d,  $J = 18.7$  Hz, 3H).  $^{13}\text{C}$  NMR (101 MHz,  $\text{CDCl}_3$ )  $\delta$  152.03, 150.36, 143.39,

143.02, 142.11, 139.87, 139.56, 139.25, 136.59, 136.39, 133.49, 132.45, 130.43, 130.33, 129.67, 129.20, 129.16, 129.13, 127.55, 127.42, 124.05, 123.20, 17.36, 17.09.

**(26) 7-bromo-2,3,5-trimethylquinoxaline (4bb)**<sup>3</sup>.

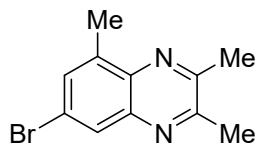

Yellow solid, Mp.66.1-68.6 °C,79% from nitroaniline; <sup>1</sup>H NMR (400 MHz, CDCl<sub>3</sub>) δ 7.96 (s, 1H), 7.57 (s, 1H), 2.72 (s, 3H), 2.70 (s, 6H). <sup>13</sup>C NMR (101 MHz, CDCl<sub>3</sub>) δ 153.90, 152.58, 141.65, 139.05, 138.68, 132.01, 128.40, 122.08, 23.35, 23.08, 16.91.

**(27) 6-chloro-2-phenylquinoxaline (4bc)**<sup>3</sup>.

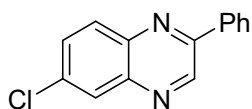

White solid, Mp.125.3-127.1 °C,two regio-isomers were separated by column chromatography, 80% from nitroaniline, <sup>1</sup>H NMR (400 MHz, CDCl<sub>3</sub>) δ 9.29 (s, 1H), 8.39 – 8.14 (m, 2H), 8.13 – 7.97 (m, 2H), 7.69 (dd, *J* = 8.9, 2.3 Hz, 1H), 7.55 (qd, *J* = 7.8, 6.8, 3.8 Hz, 3H). <sup>13</sup>C NMR (101 MHz, CDCl<sub>3</sub>) δ 150.71, 143.47, 141.80, 140.82, 135.98, 135.24, 131.31, 130.84, 130.45, 129.23, 128.08, 127.51.

**(28) 7-chloro-2-phenylquinoxaline (4bc')**<sup>3</sup>.

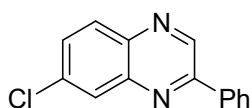

White solid, Mp.146.3-148.2 °C, two regio-isomers were separated by column chromatography, 80% from nitroaniline, <sup>1</sup>H NMR (400 MHz, CDCl<sub>3</sub>) δ 9.32 (s, 1H), 8.26 – 8.11 (m, 3H), 8.06 (d, *J* = 6.1 Hz, 1H), 7.69 (dd, *J* = 8.9, 2.5 Hz, 1H), 7.63 – 7.49 (m, 3H). <sup>13</sup>C NMR (101 MHz, CDCl<sub>3</sub>) δ 152.51, 143.46, 142.64, 140.11, 136.32, 136.14, 130.60, 130.57, 130.38, 129.26, 128.52, 127.64.

**(29) 2,3-dimethylpyrido[3,4-b] pyrazine (4bd)**<sup>6</sup>.

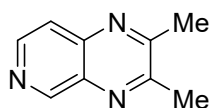

Gray solid; Mp.109.8-111.4 °C, 65% from nitroaniline; <sup>1</sup>H NMR (400 MHz, CDCl<sub>3</sub>) δ 9.34 (s, 1H),

8.67 (d,  $J = 5.7$  Hz, 1H), 7.75 (d,  $J = 5.7$  Hz, 1H), 2.72 (s, 6H).  $^{13}\text{C}$  NMR (101 MHz,  $\text{CDCl}_3$ )  $\delta$  158.82, 155.73, 153.36, 146.60, 143.76, 136.50, 120.91, 23.70, 23.33.

**(30) 1,3-diphenylpropan-1-one (8aa)**<sup>7</sup>.

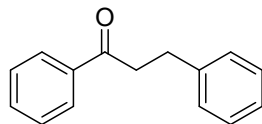

White solid, Mp.72.3-73.9 °C, 92% yield;  $^1\text{H}$  NMR (400 MHz,  $\text{CDCl}_3$ )  $\delta$  8.07 – 8.00 (m, 2H), 7.60 (d,  $J = 7.4$  Hz, 1H), 7.51 (dd,  $J = 8.5, 7.0$  Hz, 2H), 7.39 – 7.31 (m, 4H), 7.29 (d,  $J = 6.9$  Hz, 1H), 3.36 (dd,  $J = 8.5, 6.9$  Hz, 2H), 3.15 (dd,  $J = 8.5, 6.9$  Hz, 2H).  $^{13}\text{C}$  NMR (101 MHz,  $\text{CDCl}_3$ )  $\delta$  199.23, 141.32, 136.92, 133.07, 128.63, 128.55, 128.45, 128.07, 126.16, 40.46, 30.17.

**(31) 3-(4-methoxyphenyl)-1-phenylpropan-1-one (8ab)**<sup>7</sup>.

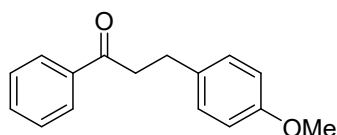

White solid, Mp.59.1-61.2 °C, 86% yield;  $^1\text{H}$  NMR (400 MHz,  $\text{CDCl}_3$ )  $\delta$  8.02 – 7.95 (m, 2H), 7.57 (d,  $J = 7.4$  Hz, 1H), 7.48 (t,  $J = 7.7$  Hz, 2H), 7.23 – 7.17 (m, 2H), 6.91 – 6.85 (m, 2H), 3.82 (s, 3H), 3.30 (dd,  $J = 8.4, 6.9$  Hz, 2H), 3.05 (t,  $J = 7.7$  Hz, 2H).  $^{13}\text{C}$  NMR (101 MHz,  $\text{CDCl}_3$ )  $\delta$  197.81, 163.48, 141.50, 130.32, 130.04, 128.52, 128.44, 126.09, 113.76, 55.46, 40.11, 30.37.

**(32) 3-(3-methoxyphenyl)-1-phenylpropan-1-one (8ac)**<sup>7</sup>.

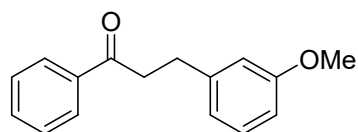

White solid, Mp.66.7-68.2 °C, 84% yield;  $^1\text{H}$  NMR (400 MHz,  $\text{CDCl}_3$ )  $\delta$  7.59 – 7.51 (m, 2H), 7.38 (t,  $J = 7.9$  Hz, 1H), 7.36 – 7.31 (m, 2H), 7.31 – 7.27 (m, 2H), 7.26 – 7.23 (m, 1H), 7.13 (ddd,  $J = 8.2, 2.7, 1.0$  Hz, 1H), 3.88 (s, 3H), 3.32 (dd,  $J = 8.5, 7.0$  Hz, 2H), 3.10 (dd,  $J = 8.5, 6.9$  Hz, 2H).  $^{13}\text{C}$  NMR (101 MHz,  $\text{CDCl}_3$ )  $\delta$  199.95, 157.57, 137.06, 132.86, 130.16, 129.59, 128.52, 128.12, 127.51, 120.56, 110.31, 55.21, 38.96, 25.75.

**(33) 3-(2-methoxyphenyl)-1-phenylpropan-1-one (8ad)**<sup>7</sup>.

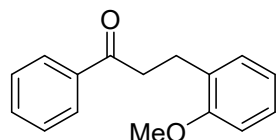

Colorless liquid, 81% yield;  $^1\text{H NMR}$  (400 MHz,  $\text{CDCl}_3$ )  $\delta$  8.05 – 7.97 (m, 2H), 7.61 – 7.54 (m, 1H), 7.51 – 7.45 (m, 2H), 7.24 (ddd,  $J = 7.2, 4.4, 2.6$  Hz, 2H), 6.96 – 6.87 (m, 2H), 3.86 (s, 3H), 3.30 (dd,  $J = 8.9, 6.9$  Hz, 2H), 3.09 (dd,  $J = 8.7, 6.8$  Hz, 2H).  $^{13}\text{C NMR}$  (101 MHz,  $\text{CDCl}_3$ )  $\delta$  199.02, 159.91, 141.30, 138.32, 129.59, 128.54, 128.44, 126.15, 120.68, 119.57, 112.35, 55.45, 40.55, 30.23.

**(34) 1-phenyl-3-(*o*-tolyl) propan-1-one (8ae)**<sup>8</sup>.

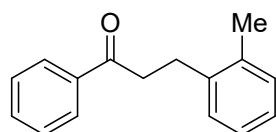

Colorless liquid, 88% yield;  $^1\text{H NMR}$  (400 MHz,  $\text{CDCl}_3$ )  $\delta$  8.07 – 7.97 (m, 2H), 7.65 – 7.56 (m, 1H), 7.50 (t,  $J = 7.6$  Hz, 2H), 7.26 – 7.16 (m, 4H), 3.34 – 3.26 (m, 2H), 3.14 – 3.07 (m, 2H), 2.40 (s, 3H).  $^{13}\text{C NMR}$  (101 MHz,  $\text{CDCl}_3$ )  $\delta$  199.38, 139.42, 136.91, 136.02, 133.11, 130.38, 128.77, 128.66, 128.08, 126.36, 126.21, 39.14, 27.56, 19.38.

**(35) 3-([1,1'-biphenyl]-4-yl)-1-phenylpropan-1-one (8af)**<sup>8</sup>.

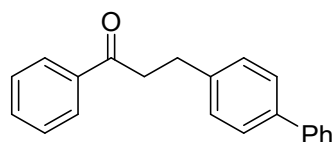

White solid, Mp.68.3-70.2 °C, 83% yield;  $^1\text{H NMR}$  (400 MHz,  $\text{CDCl}_3$ )  $\delta$  8.03 (d,  $J = 8.0$  Hz, 2H), 7.63 (d,  $J = 7.2$  Hz, 2H), 7.60 (dd,  $J = 7.8, 3.6$  Hz, 3H), 7.49 (dt,  $J = 10.1, 7.8$  Hz, 4H), 7.42 – 7.35 (m, 3H), 3.39 (t,  $J = 7.6$  Hz, 2H), 3.17 (t,  $J = 7.6$  Hz, 2H).  $^{13}\text{C NMR}$  (101 MHz,  $\text{CDCl}_3$ )  $\delta$  199.21, 141.03, 140.47, 139.18, 136.92, 133.15, 128.93, 128.80, 128.68, 128.11, 127.32, 127.17, 127.06, 40.41, 29.79.

**(36) 3-(4-chlorophenyl)-1-phenylpropan-1-one (8ag)**<sup>7</sup>.

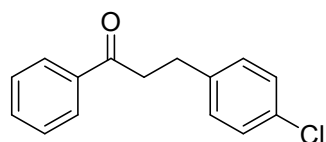

White solid, Mp.58.2-59.9 °C, 82% yield;  $^1\text{H NMR}$  (400 MHz,  $\text{CDCl}_3$ )  $\delta$  8.01 – 7.94 (m, 2H), 7.62 – 7.56 (m, 1H), 7.52 – 7.45 (m, 2H), 7.28 (dt,  $J = 6.8, 2.2$  Hz, 2H), 7.23 – 7.19 (m, 2H), 3.31 (t,  $J = 7.5$  Hz, 2H), 3.07 (t,  $J = 7.5$  Hz, 2H).  $^{13}\text{C NMR}$  (101 MHz,  $\text{CDCl}_3$ )  $\delta$  198.82, 139.74, 136.79, 133.15,

131.89, 129.82, 128.64, 128.60, 128.01, 40.13, 29.40.

**(37) 3-(2-bromophenyl)-1-phenylpropan-1-one (8ah)**<sup>7</sup>.

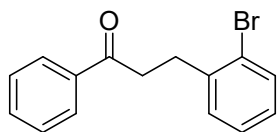

Colorless liquid, 80% yield; <sup>1</sup>H NMR (400 MHz, CDCl<sub>3</sub>) δ 8.04 – 7.97 (m, 2H), 7.58 (dd, *J* = 7.9, 1.4 Hz, 2H), 7.48 (dd, *J* = 8.4, 7.0 Hz, 2H), 7.35 (dd, *J* = 7.6, 1.8 Hz, 1H), 7.27 (td, *J* = 7.5, 1.3 Hz, 1H), 7.11 (td, *J* = 7.6, 1.8 Hz, 1H), 3.35 (dd, *J* = 8.3, 6.3 Hz, 2H), 3.22 (t, *J* = 7.9 Hz, 2H). <sup>13</sup>C NMR (101 MHz, CDCl<sub>3</sub>) δ 198.91, 140.60, 136.81, 133.14, 132.92, 130.83, 128.64, 128.10, 128.01, 127.67, 124.40, 38.63, 30.83.

**(38) 1-phenyl-3-(thiophen-2-yl) propan-1-one (8ai)**<sup>7</sup>.

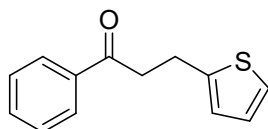

Yellow liquid, 88% yield; <sup>1</sup>H NMR (400 MHz, CDCl<sub>3</sub>) δ 8.00 (dd, *J* = 8.4, 1.3 Hz, 2H), 7.64 – 7.56 (m, 1H), 7.49 (dd, *J* = 8.3, 6.9 Hz, 2H), 7.16 (dd, *J* = 5.1, 1.2 Hz, 1H), 6.96 (dd, *J* = 5.1, 3.4 Hz, 1H), 6.90 (dd, *J* = 3.4, 1.1 Hz, 1H), 3.40 (ddd, *J* = 7.5, 6.2, 1.8 Hz, 2H), 3.36 – 3.30 (m, 2H). <sup>13</sup>C NMR (101 MHz, CDCl<sub>3</sub>) δ 198.59, 143.91, 136.79, 133.18, 128.66, 128.06, 126.88, 124.70, 123.40, 40.46, 24.17.

**(39) 3-(4-chlorophenyl)-1-(4-methoxyphenyl) propan-1-one (8aj)**<sup>9</sup>.

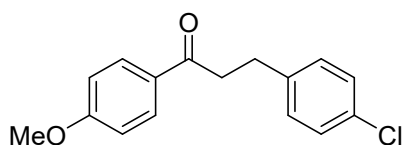

Colorless liquid, 77% yield; <sup>1</sup>H NMR (400 MHz, CDCl<sub>3</sub>) δ 7.99 – 7.91 (m, 2H), 7.30 – 7.25 (m, 2H), 7.21 – 7.18 (m, 2H), 6.97 – 6.91 (m, 2H), 3.87 (s, 3H), 3.24 (t, *J* = 7.7 Hz, 2H), 3.04 (t, *J* = 7.6 Hz, 2H). <sup>13</sup>C NMR (101 MHz, CDCl<sub>3</sub>) δ 197.41, 163.61, 139.96, 137.93, 131.80, 130.31, 129.86, 128.58, 113.79, 55.49, 39.78, 29.58.

**(40) 1-(4-methoxyphenyl)-3-(m-tolyl) propan-1-one (8ak)**<sup>9</sup>.

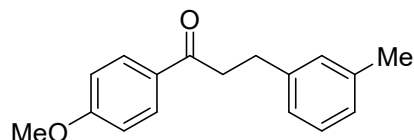

Colorless liquid, 78% yield;  $^1\text{H NMR}$  (400 MHz,  $\text{CDCl}_3$ )  $\delta$  8.00 (d,  $J = 8.9$  Hz, 2H), 7.25 (t,  $J = 7.5$  Hz, 1H), 7.15 – 7.06 (m, 3H), 7.00 – 6.95 (m, 2H), 3.89 (s, 3H), 3.31 – 3.25 (m, 2H), 3.11 – 3.04 (m, 2H), 2.40 (s, 3H).  $^{13}\text{C NMR}$  (101 MHz,  $\text{CDCl}_3$ )  $\delta$  197.83, 163.50, 141.48, 138.07, 130.35, 130.08, 129.29, 128.47, 126.88, 125.46, 113.78, 55.45, 40.19, 30.33, 21.44.

**(41) 3-(2-bromophenyl)-1-(4-methoxyphenyl) propan-1-one (8al)**<sup>10</sup>.

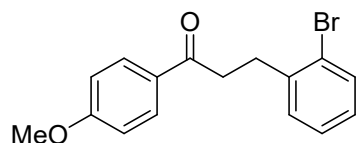

Yellow oil, 73% yield;  $^1\text{H NMR}$  (400 MHz,  $\text{CDCl}_3$ )  $\delta$  8.00 – 7.90 (m, 2H), 7.43 (s, 1H), 7.35 (dt,  $J = 7.3, 1.9$  Hz, 1H), 7.22 – 7.13 (m, 2H), 6.99 – 6.91 (m, 2H), 3.87 (s, 3H), 3.25 (t,  $J = 7.6$  Hz, 2H), 3.04 (t,  $J = 7.6$  Hz, 2H).  $^{13}\text{C NMR}$  (101 MHz,  $\text{CDCl}_3$ )  $\delta$  197.17, 163.56, 143.91, 132.02, 131.51, 130.30, 130.07, 129.22, 127.22, 122.52, 113.80, 55.48, 39.64, 29.84.

**(42) 1-(4-methoxyphenyl)-3-(thiophen-2-yl) propan-1-one (8am)**<sup>10</sup>.

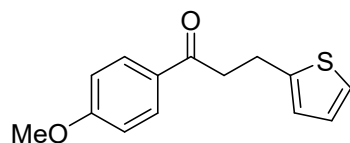

Yellow oil, 75% yield;  $^1\text{H NMR}$  (400 MHz,  $\text{CDCl}_3$ )  $\delta$  8.00 – 7.96 (m, 2H), 7.15 (dd,  $J = 5.1, 1.2$  Hz, 1H), 6.98 – 6.93 (m, 3H), 6.88 (dd,  $J = 3.4, 1.1$  Hz, 1H), 3.88 (s, 3H), 3.32 (d,  $J = 2.0$  Hz, 4H).  $^{13}\text{C NMR}$  (101 MHz,  $\text{CDCl}_3$ )  $\delta$  197.13, 163.56, 144.12, 130.33, 129.90, 126.86, 124.64, 123.34, 113.79, 55.48, 40.19, 24.41.

**(43) 1-(4-chlorophenyl)-3-(4-methoxyphenyl) propan-1-one (8an)**<sup>11</sup>.

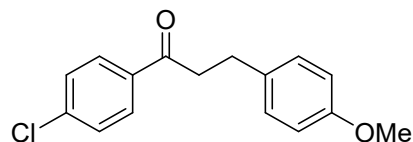

Yellow oil, 78% yield;  $^1\text{H NMR}$  (400 MHz,  $\text{CDCl}_3$ )  $\delta$  7.94 – 7.88 (m, 2H), 7.47 – 7.42 (m, 2H), 7.20 – 7.16 (m, 2H), 6.90 – 6.84 (m, 2H), 3.81 (s, 3H), 3.26 (t,  $J = 7.4$  Hz, 2H), 3.03 (t,  $J = 7.6$  Hz, 2H).  $^{13}\text{C NMR}$

NMR (101 MHz, CDCl<sub>3</sub>)  $\delta$  198.15, 158.08, 139.47, 135.24, 133.09, 129.48, 129.36, 128.92, 114.00, 55.29, 40.69, 29.23.

**(44) 1-(4-chlorophenyl)-3-(*m*-tolyl) propan-1-one (8ao)**<sup>11</sup>.

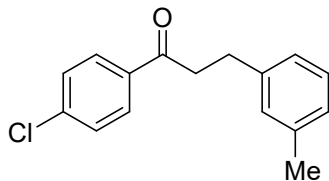

Yellow oil, 82% yield; <sup>1</sup>H NMR (400 MHz, CDCl<sub>3</sub>)  $\delta$  7.97 – 7.90 (m, 2H), 7.48 – 7.43 (m, 2H), 7.25 (t,  $J = 7.5$  Hz, 1H), 7.16 – 7.08 (m, 3H), 3.30 (dd,  $J = 8.5, 6.9$  Hz, 2H), 3.09 (d,  $J = 8.0$  Hz, 2H), 2.40 (s, 3H). <sup>13</sup>C NMR (101 MHz, CDCl<sub>3</sub>)  $\delta$  197.99, 141.08, 139.47, 138.17, 135.26, 129.52, 129.29, 128.94, 128.54, 127.03, 125.46, 40.52, 30.04, 21.47.

## 10. NMR spectra of obtained compounds



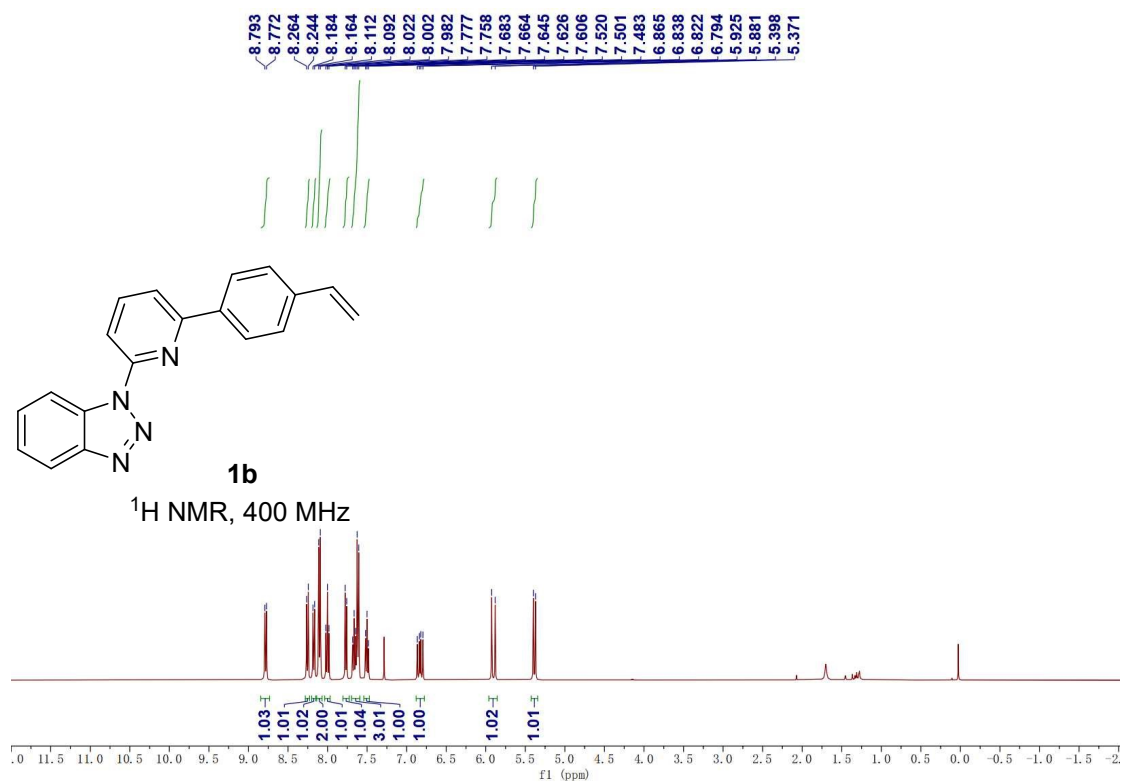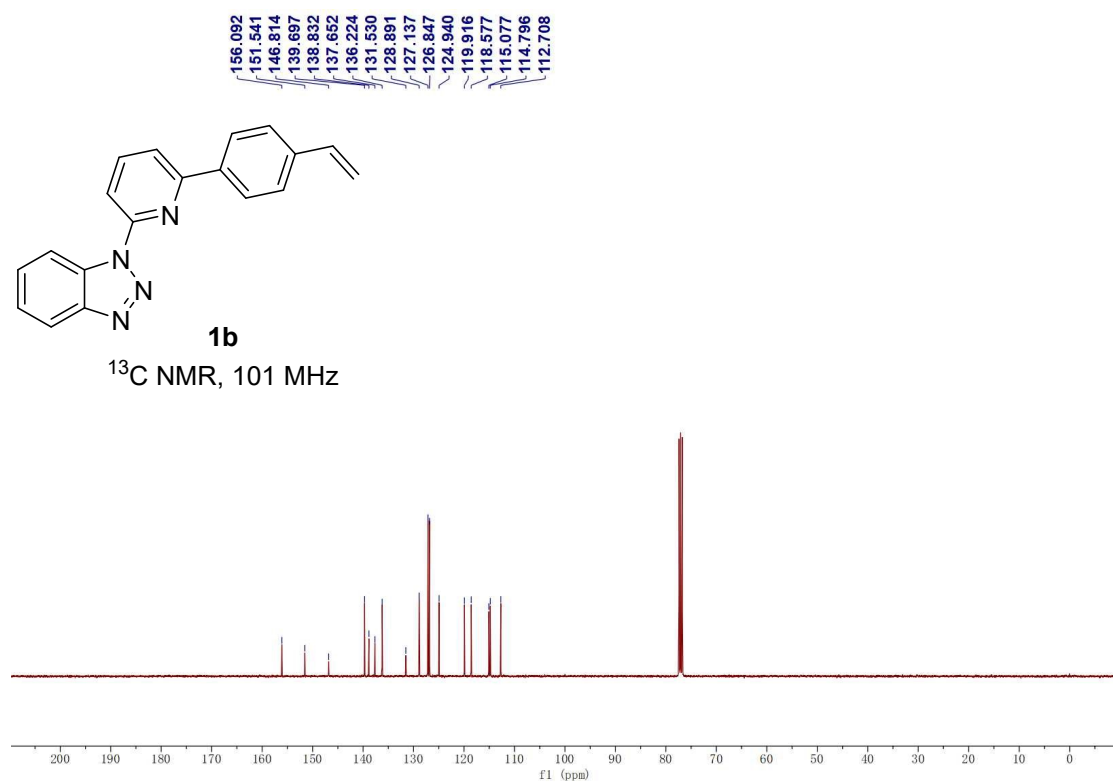

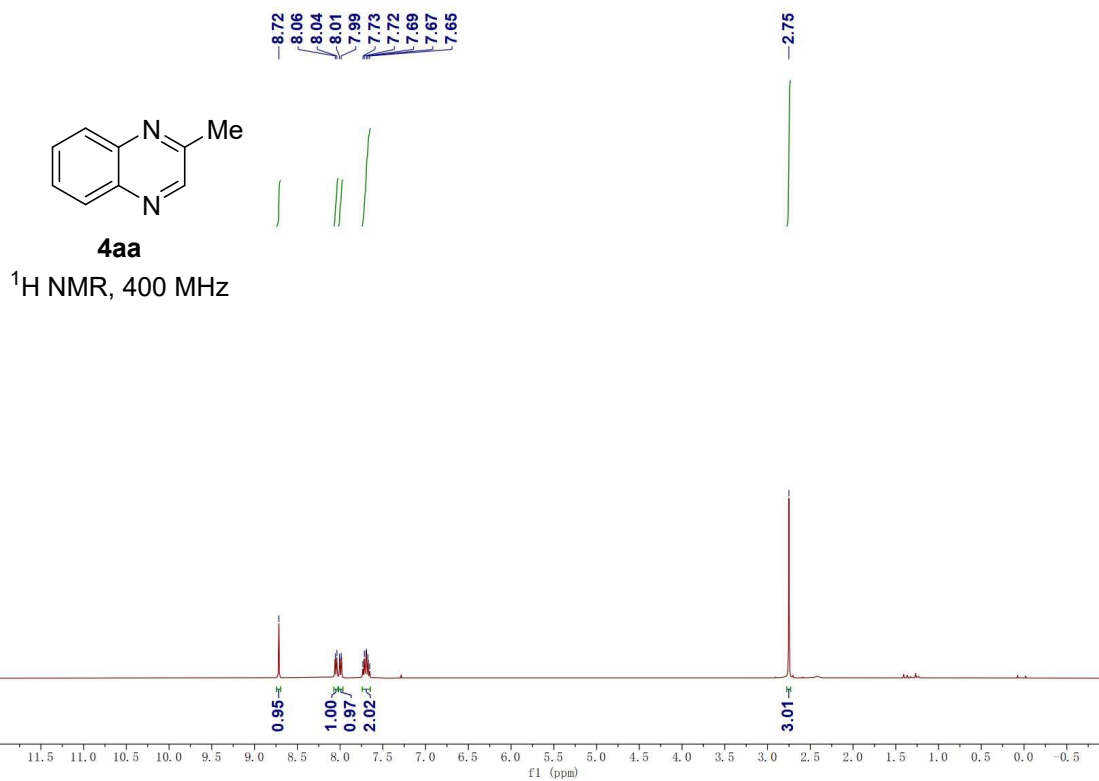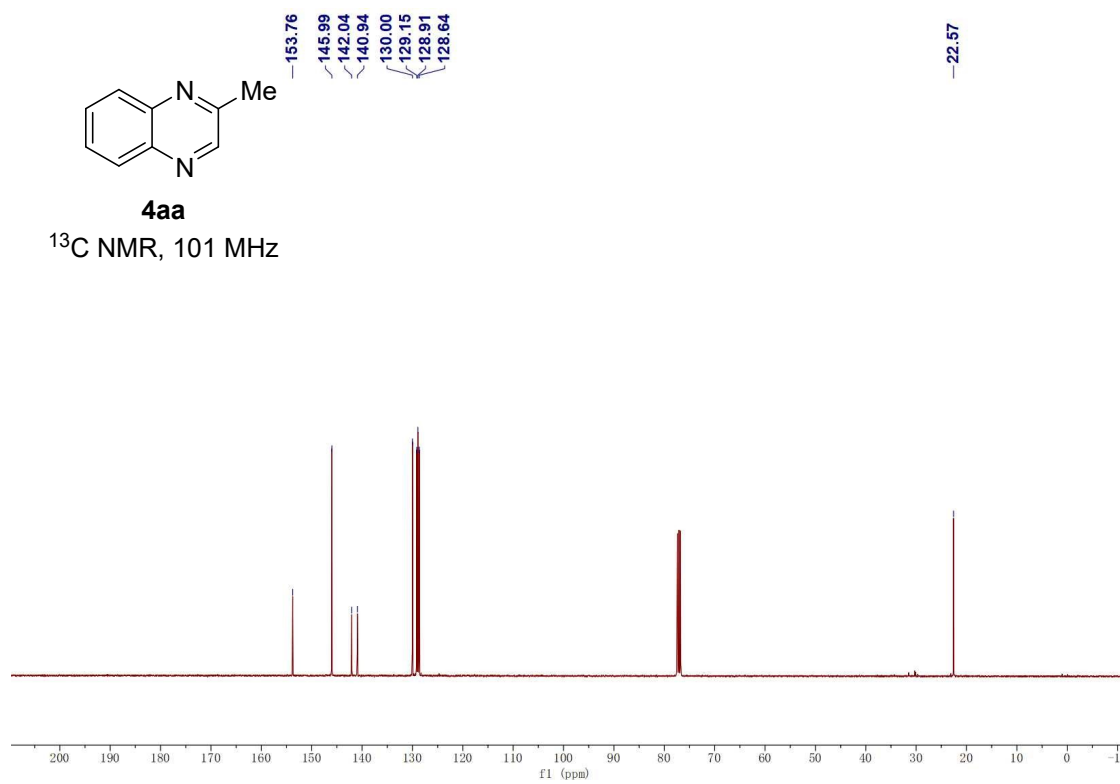

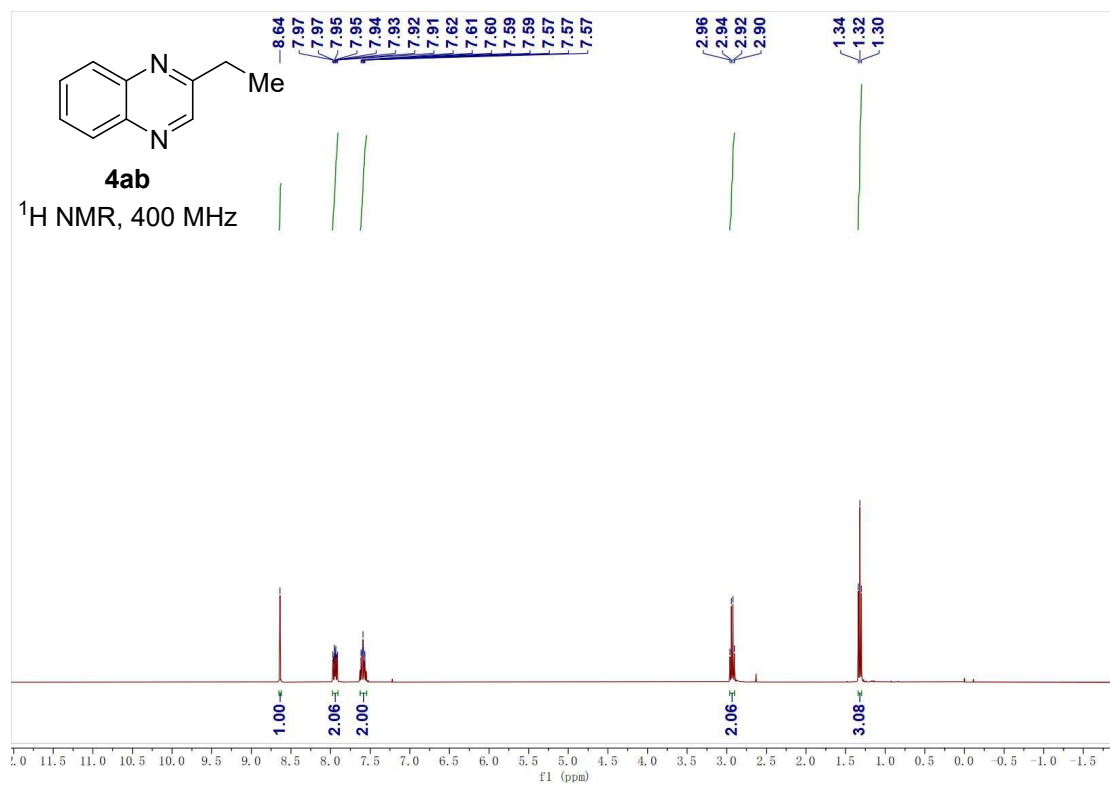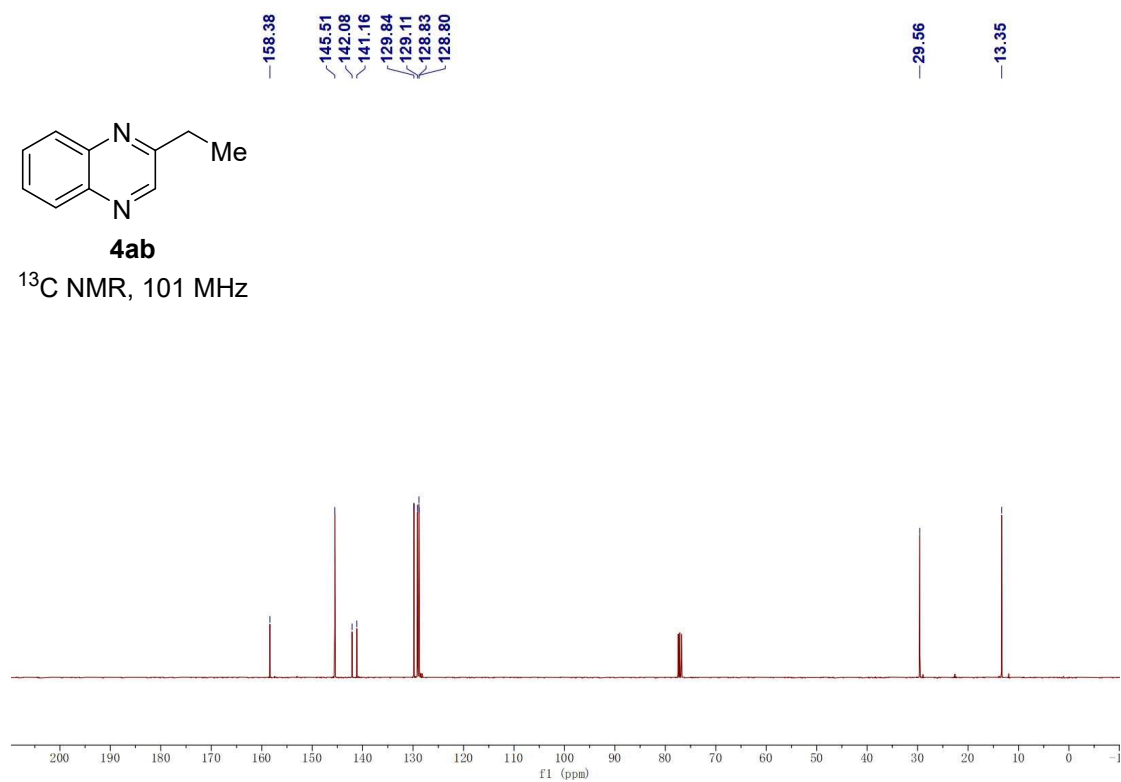

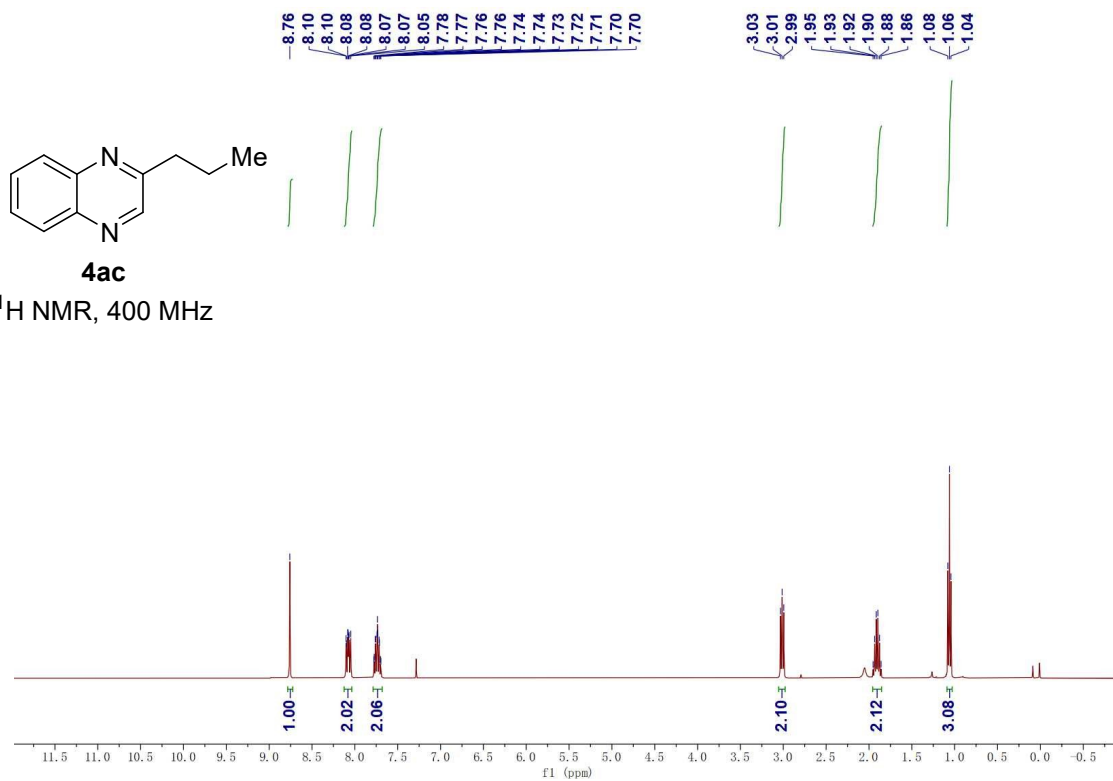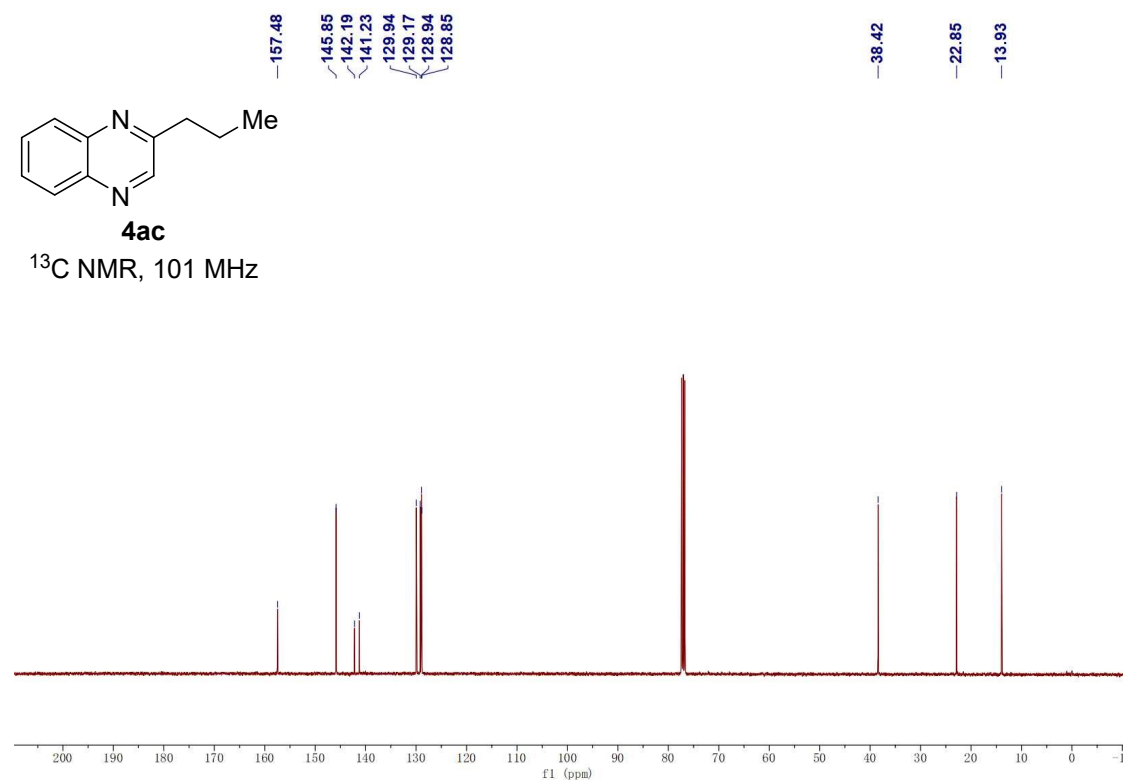

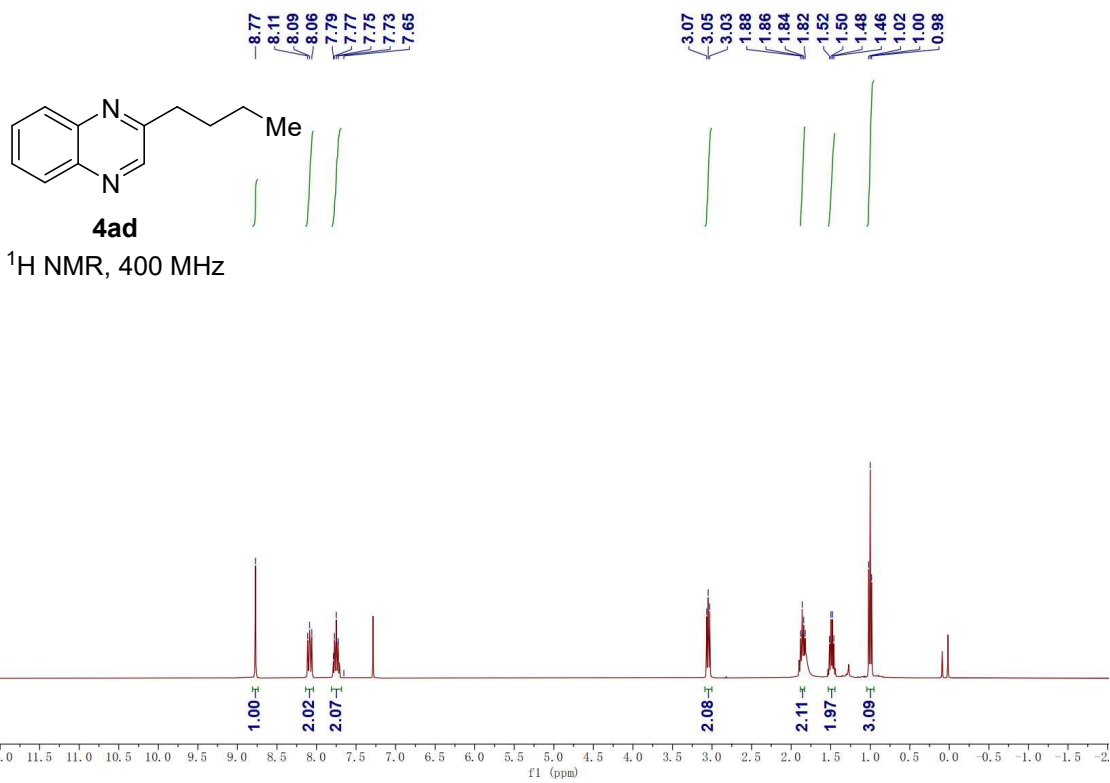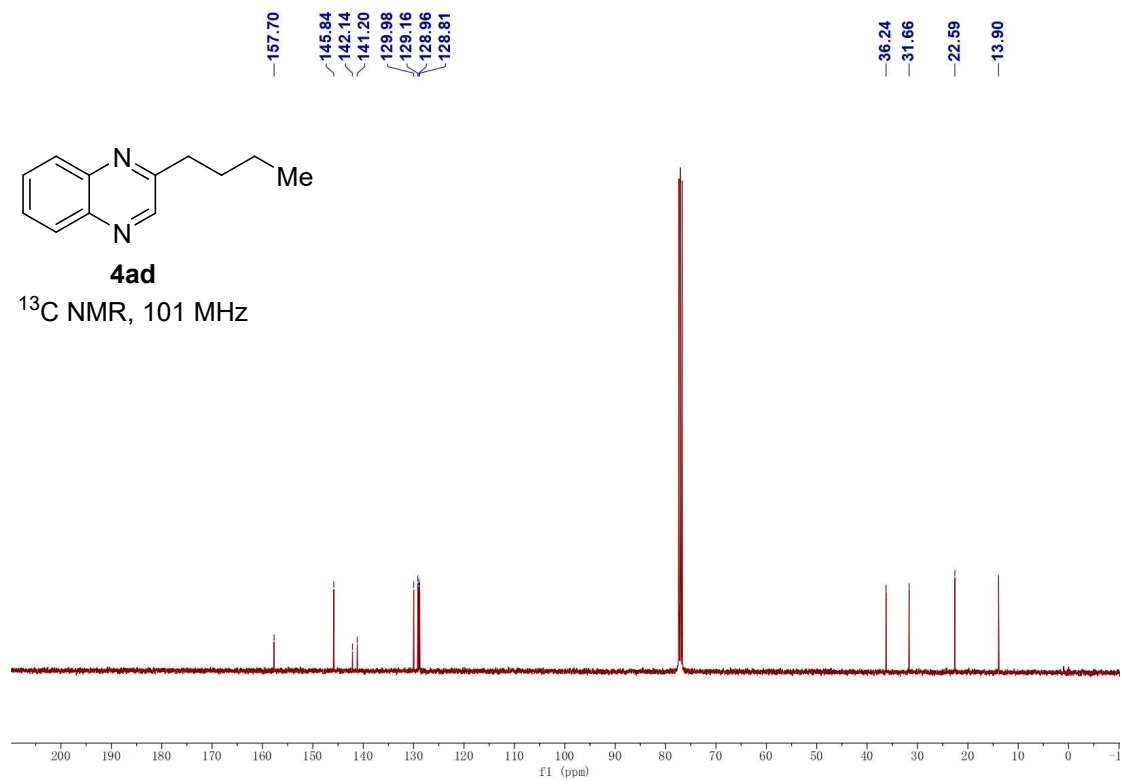

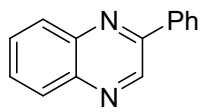

**4ae**

<sup>1</sup>H NMR, 400 MHz

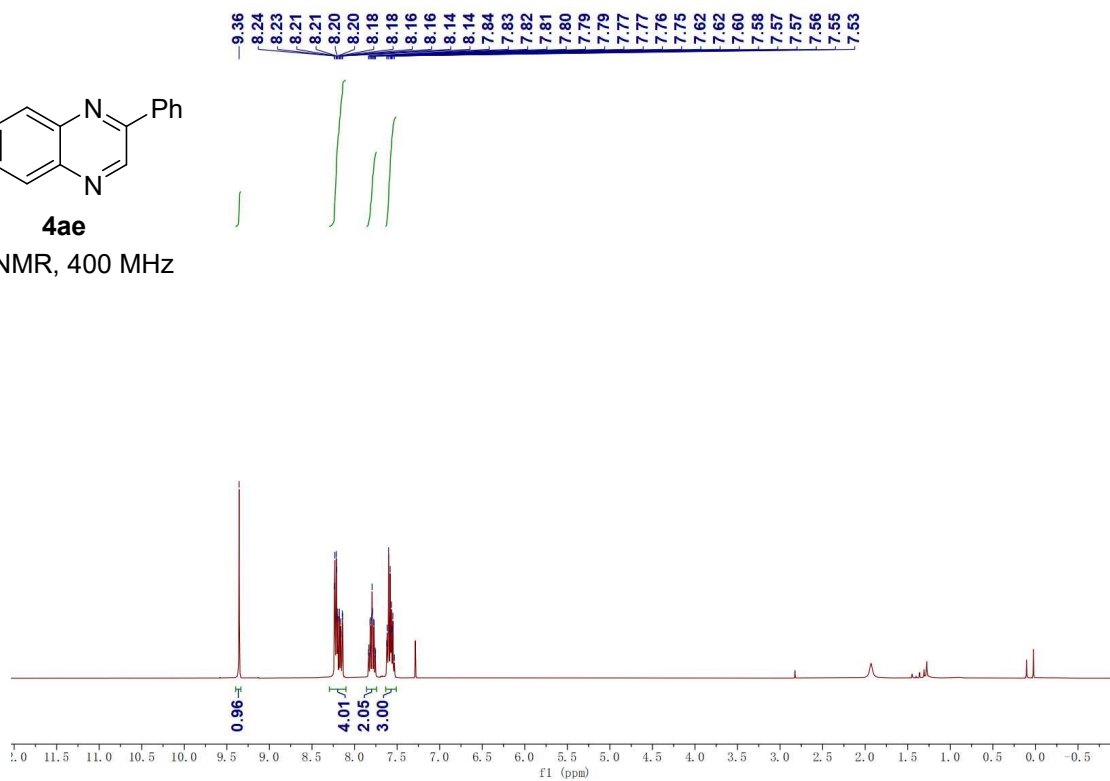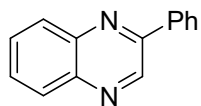

**4ae**

<sup>13</sup>C NMR, 101 MHz

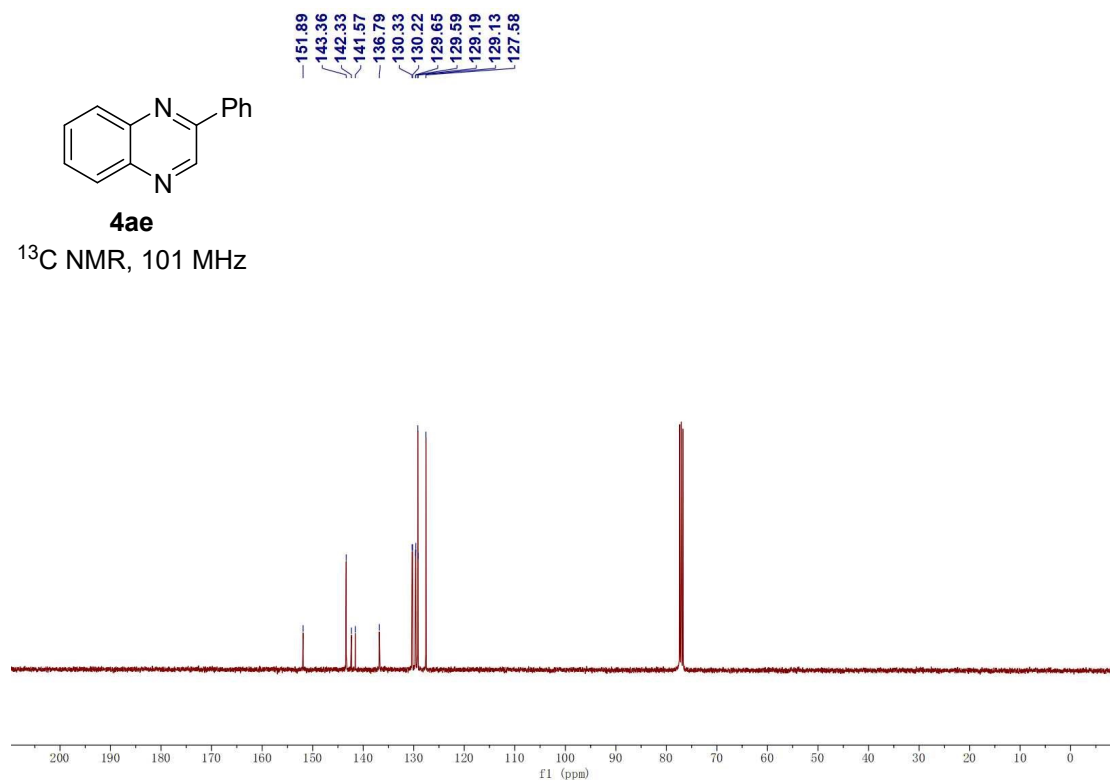

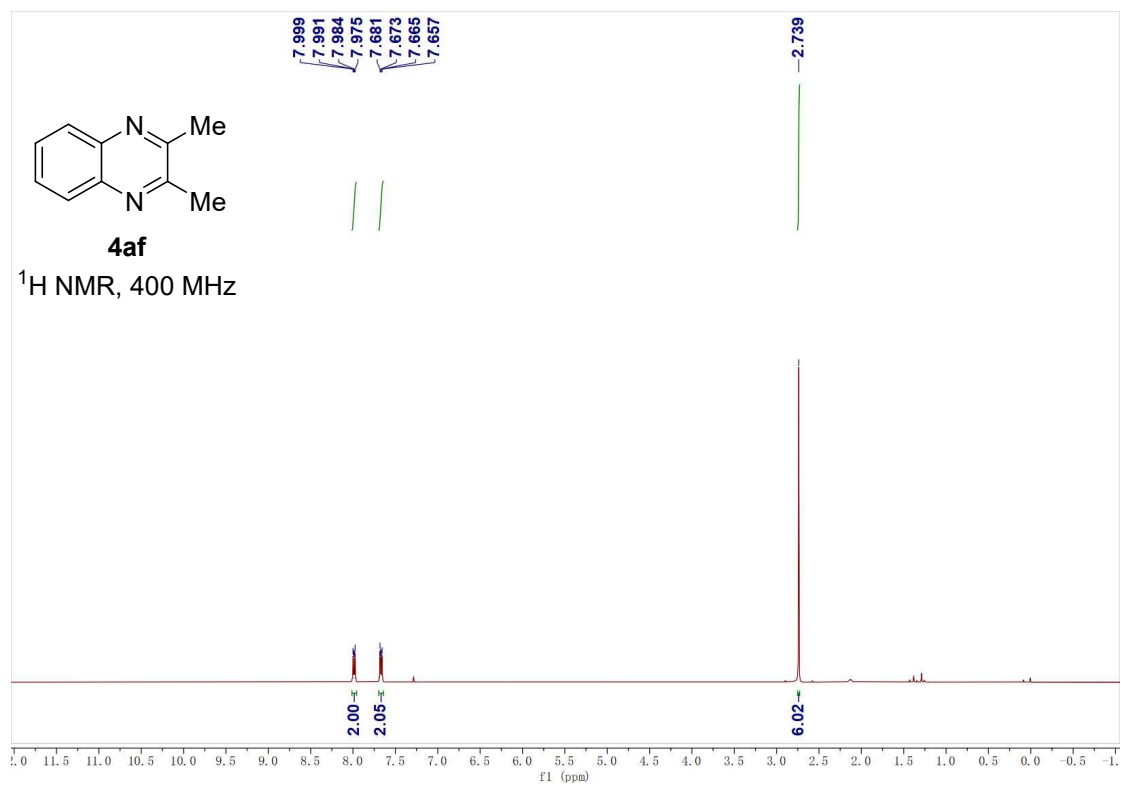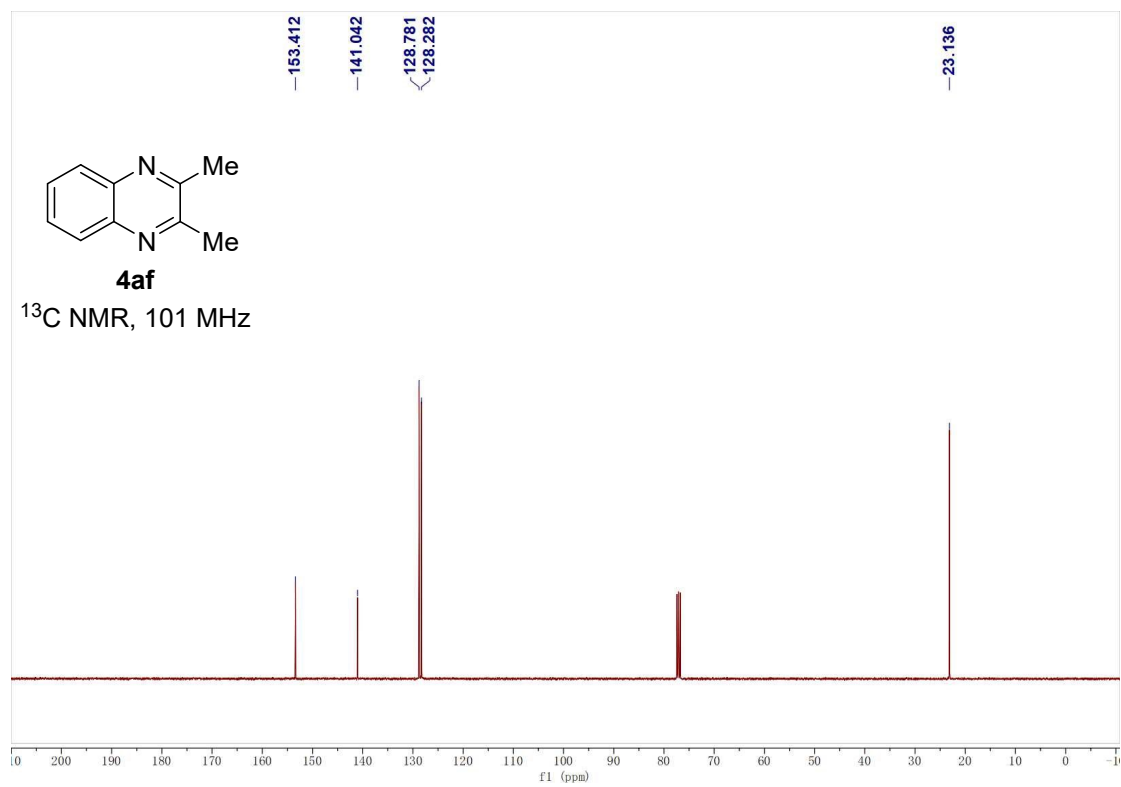

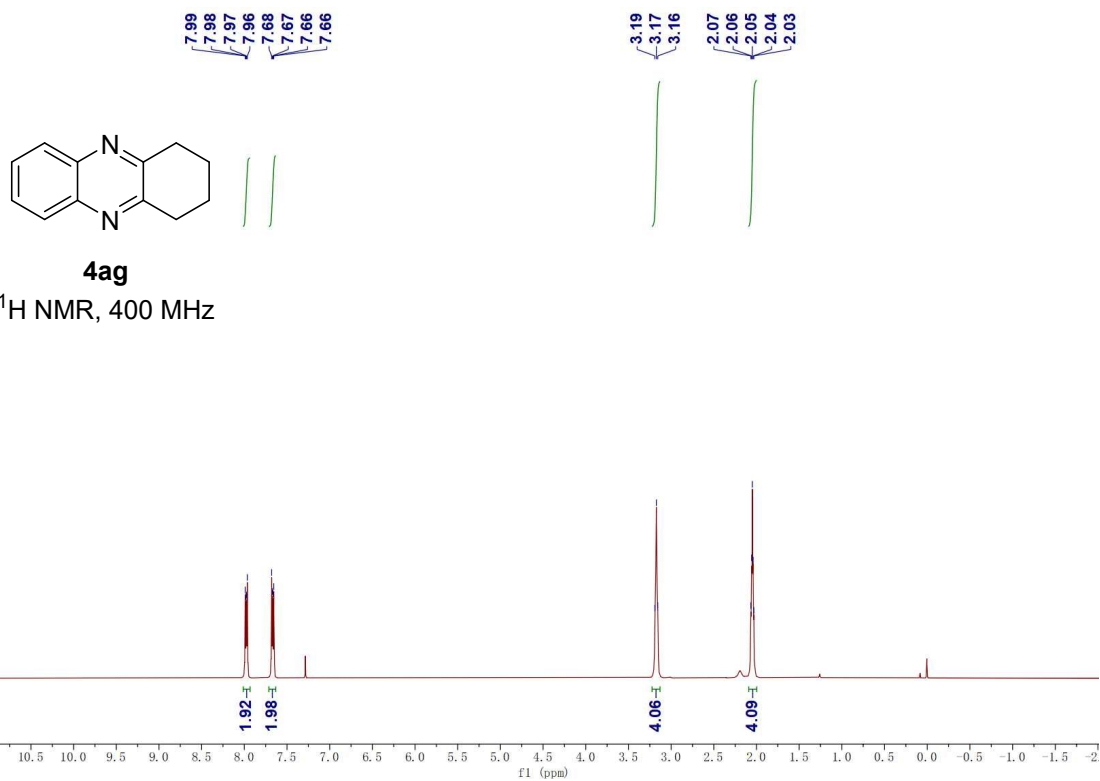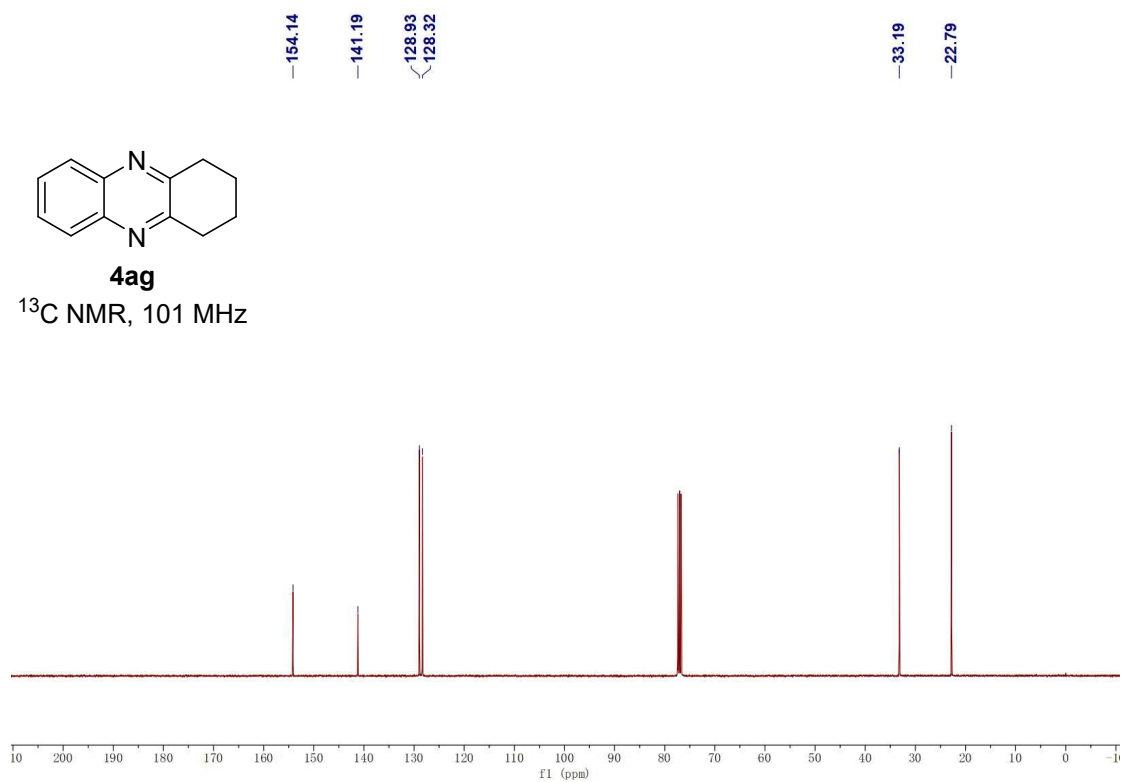



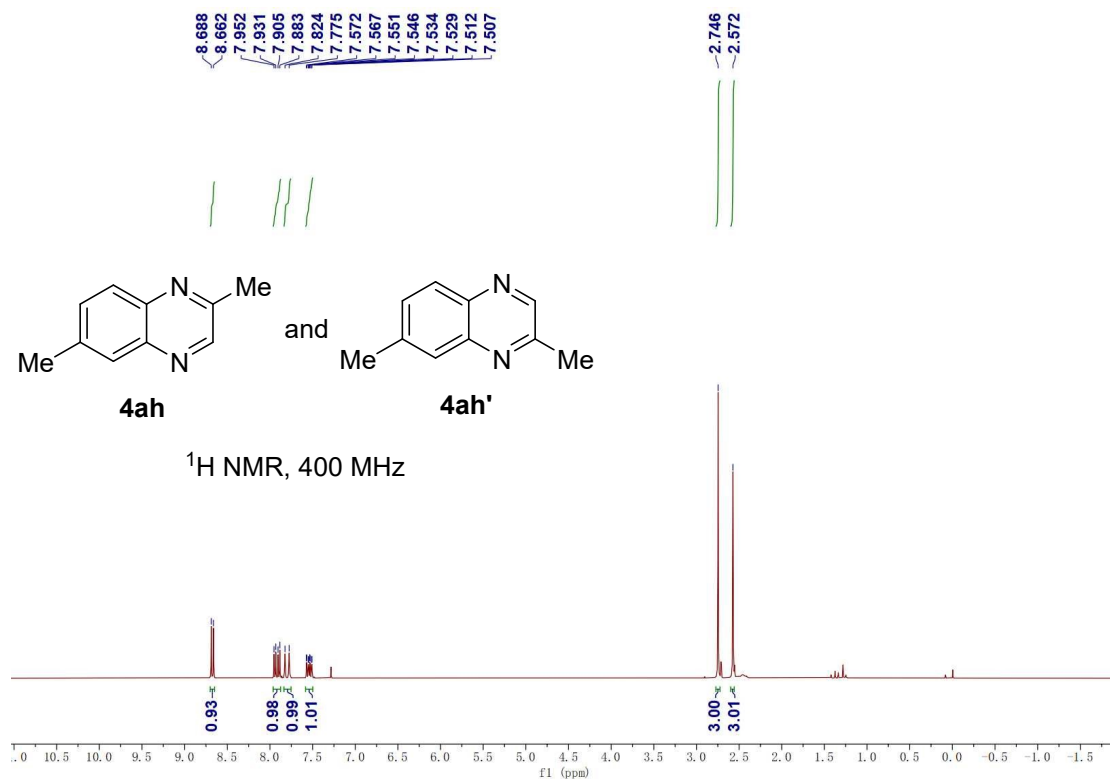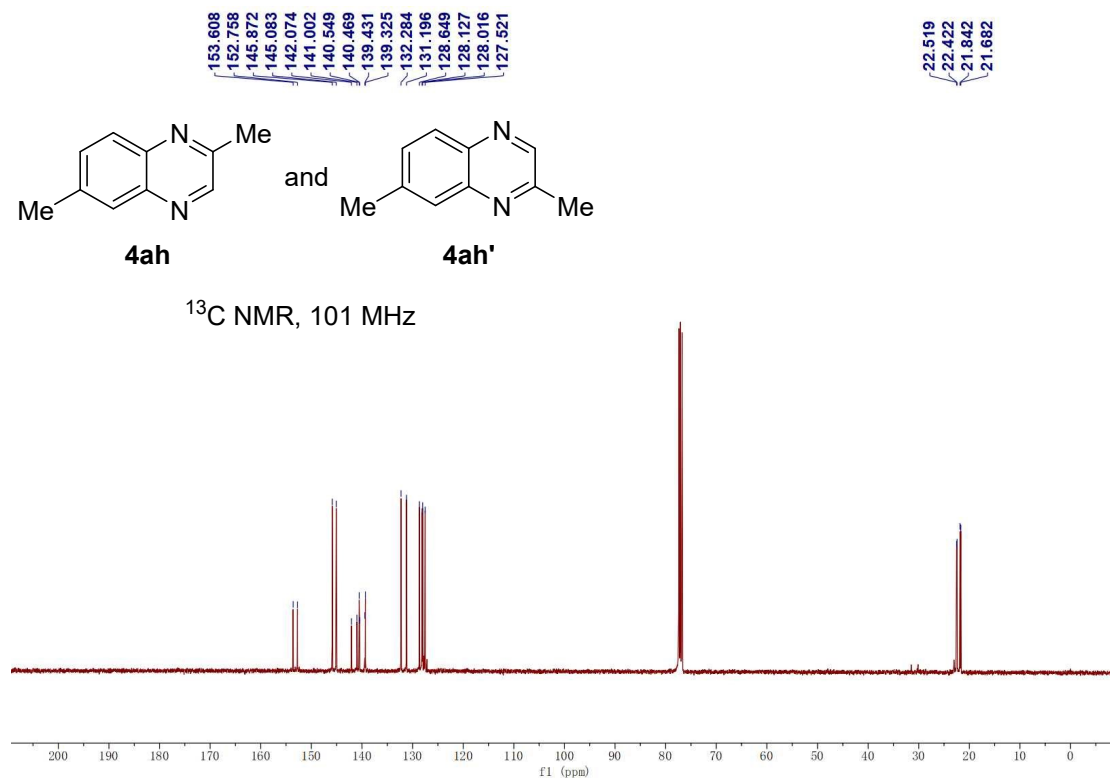

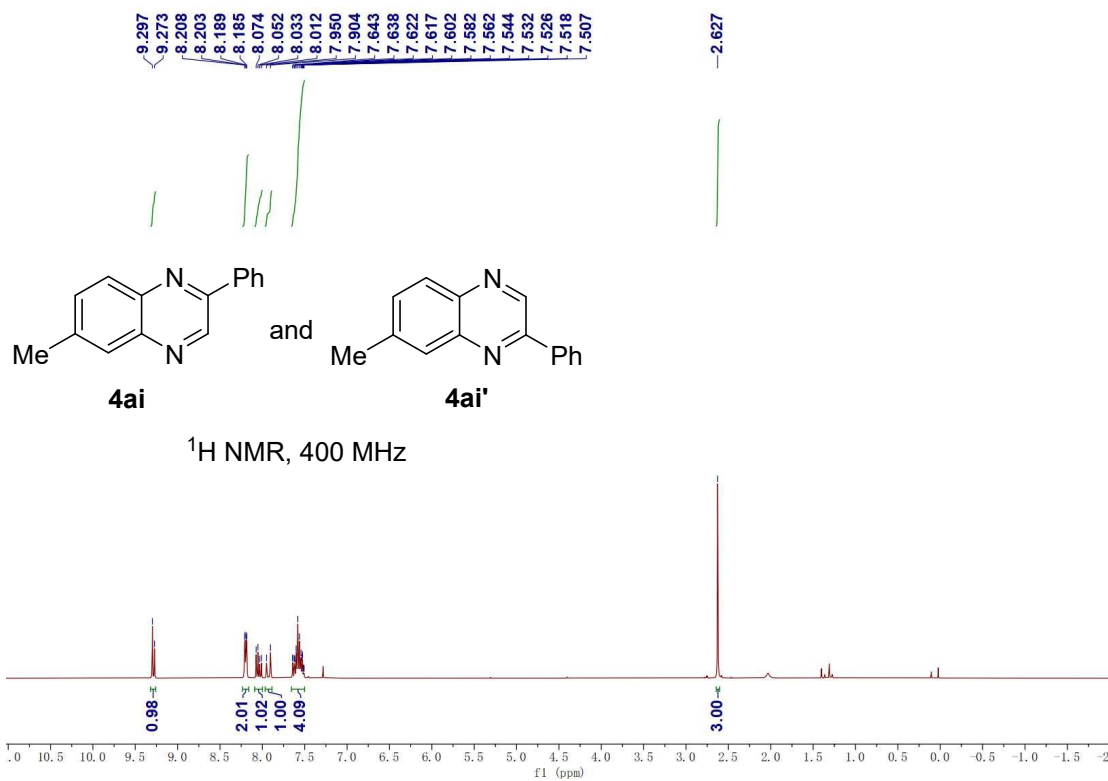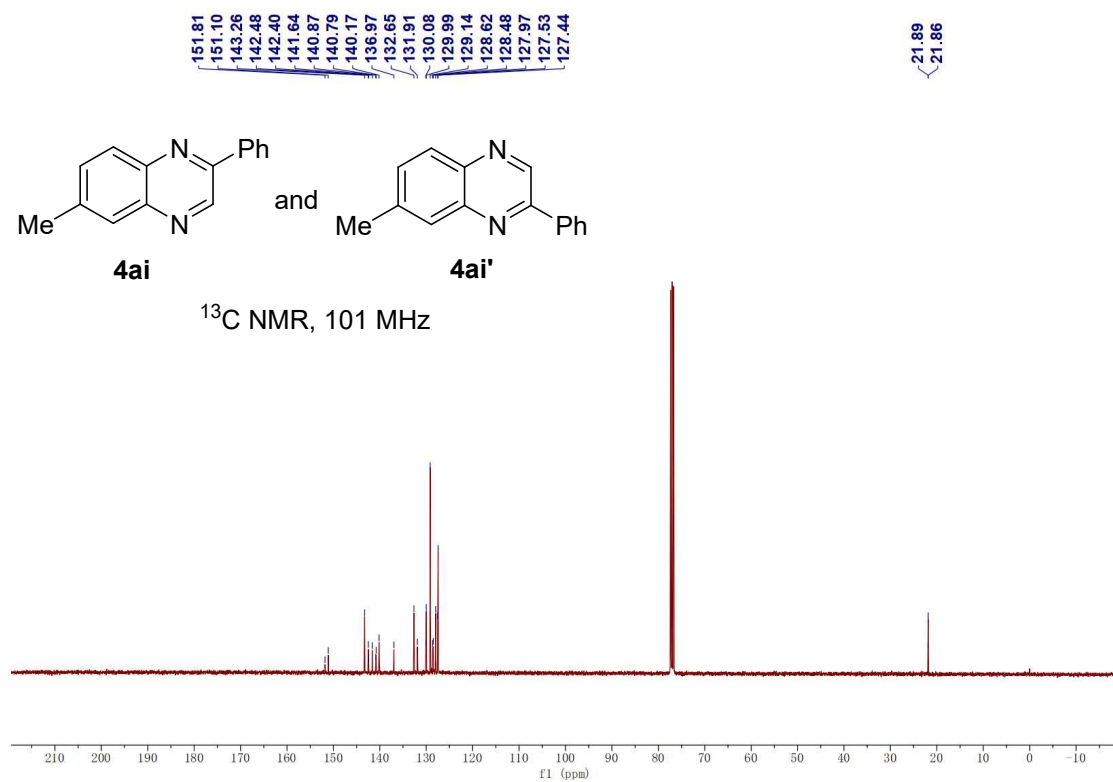

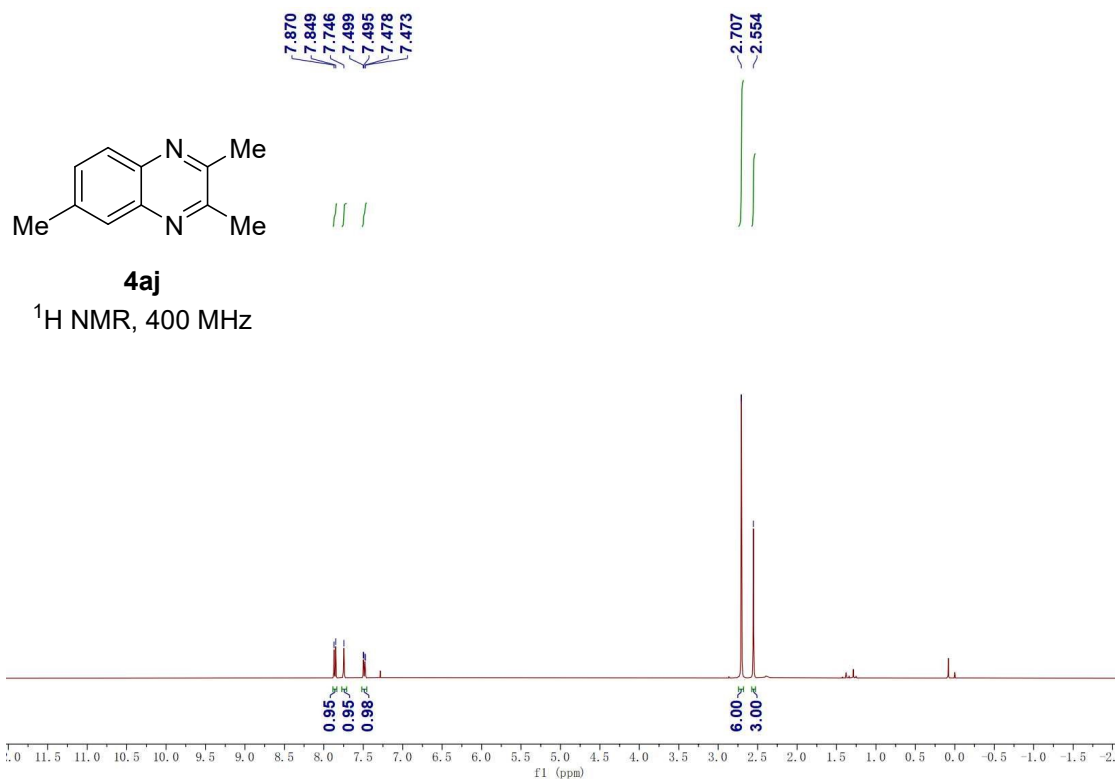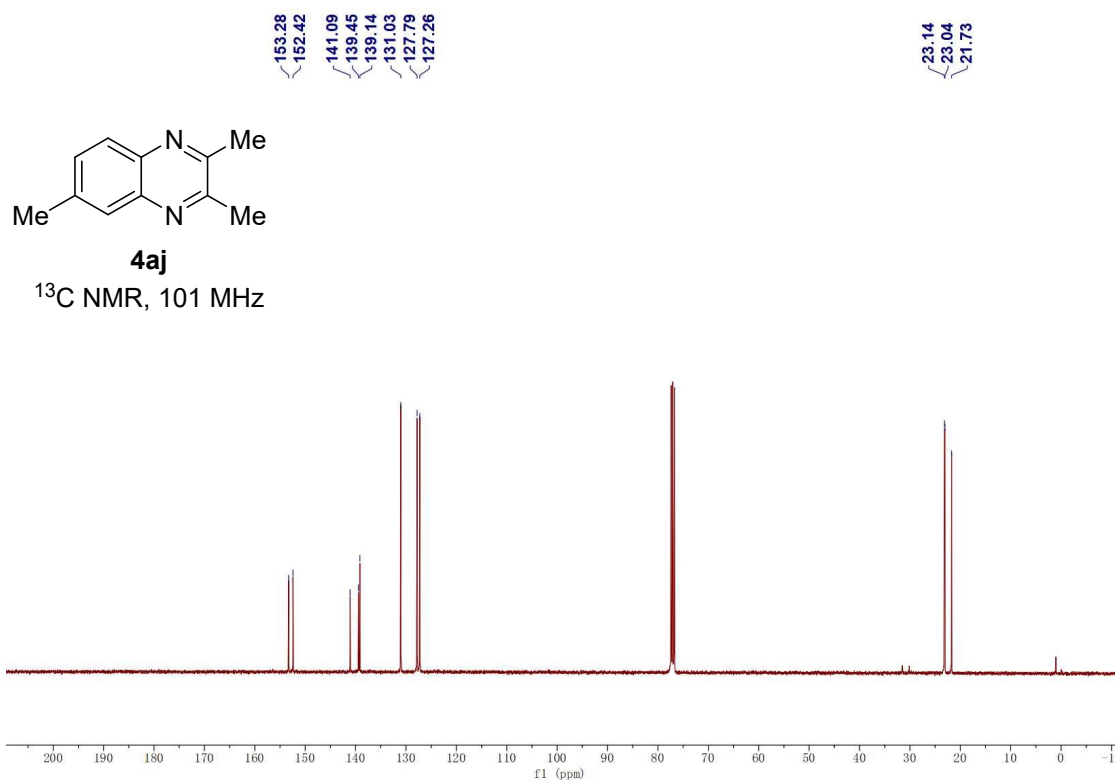

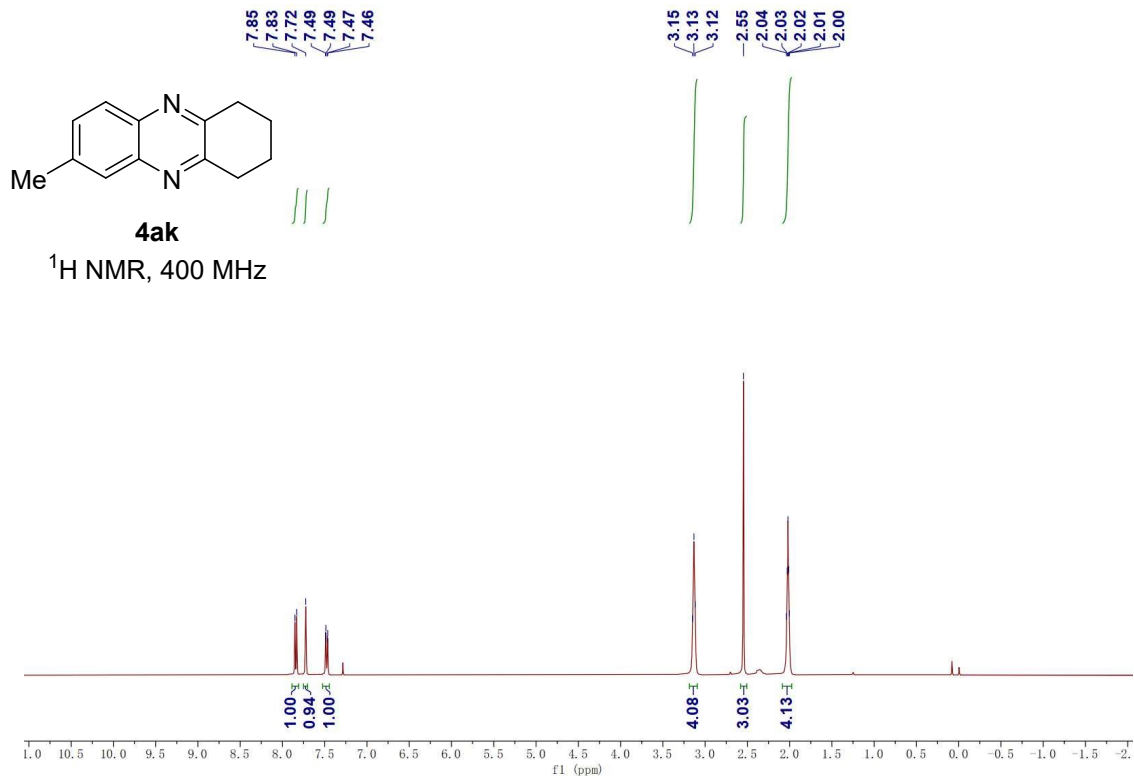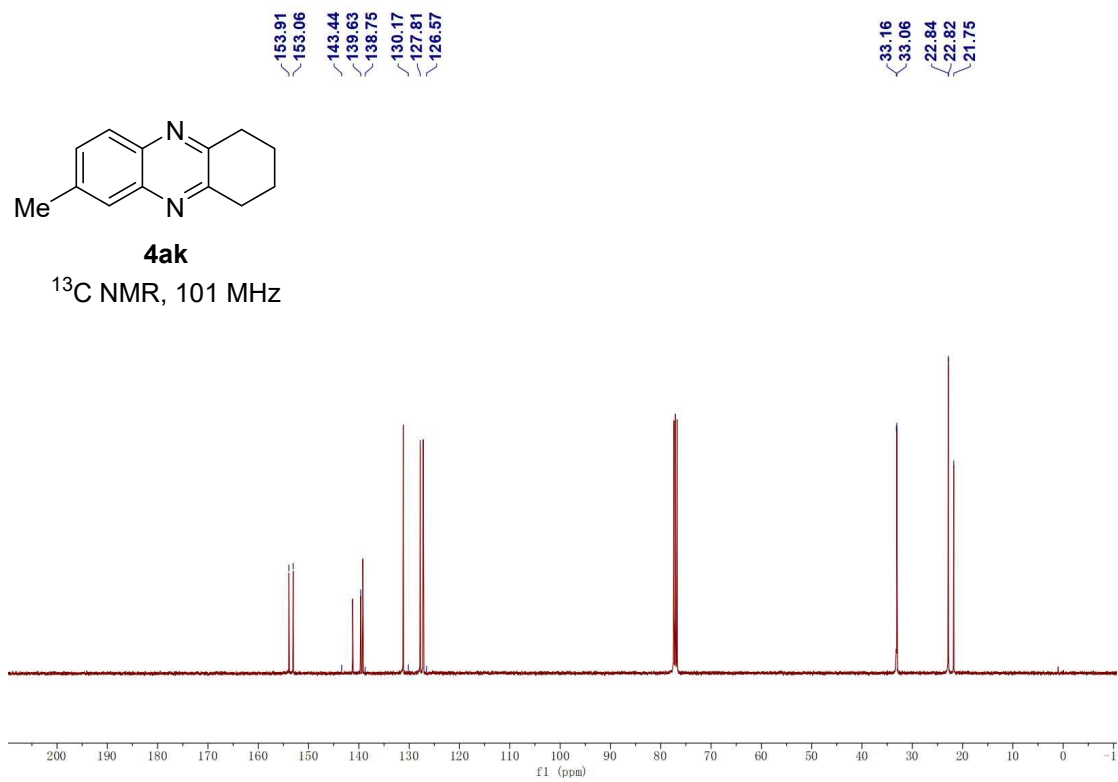

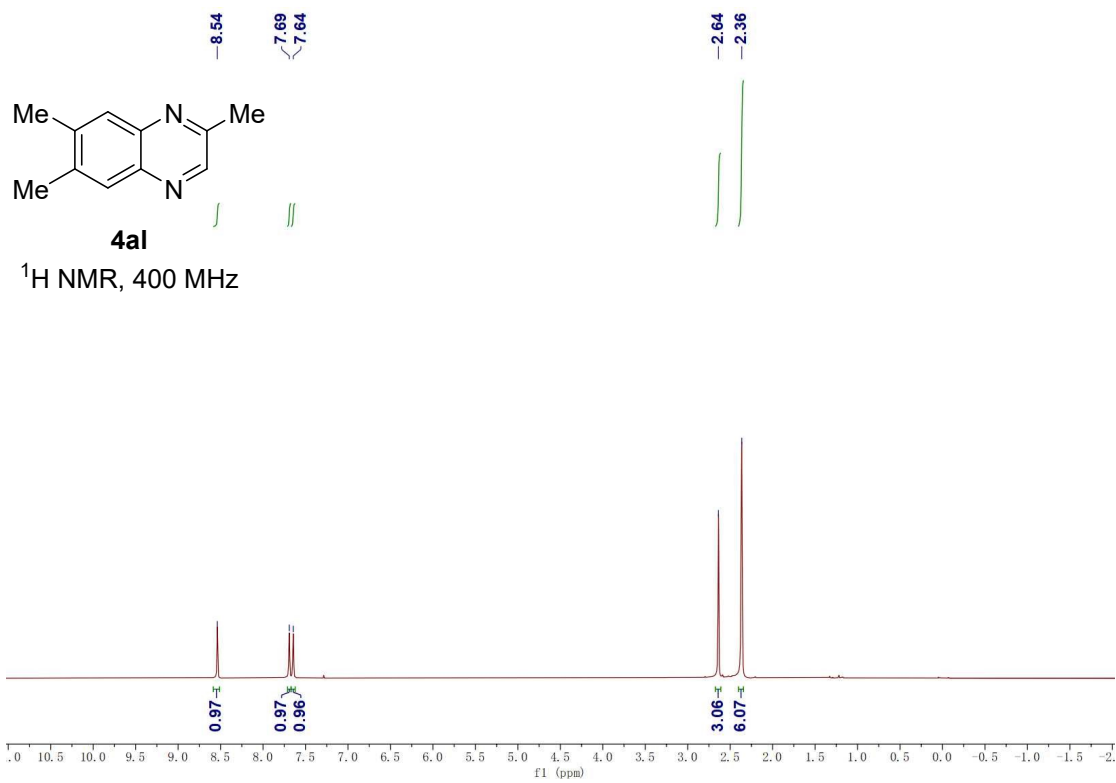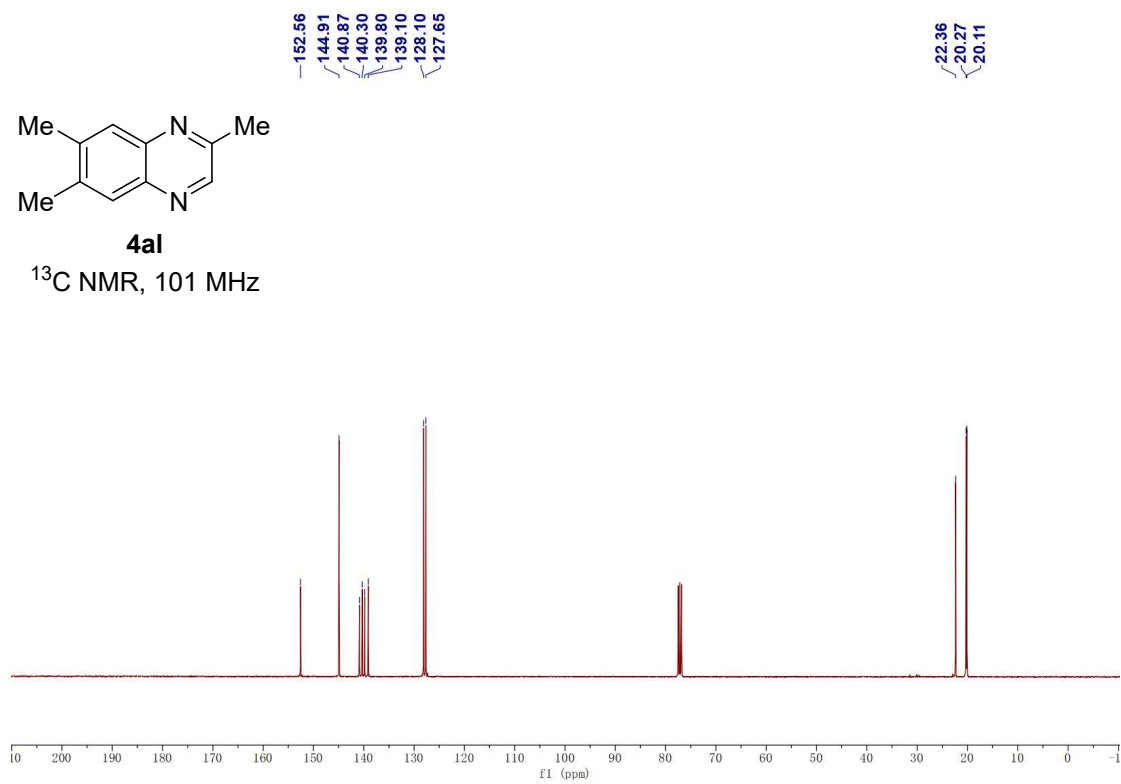

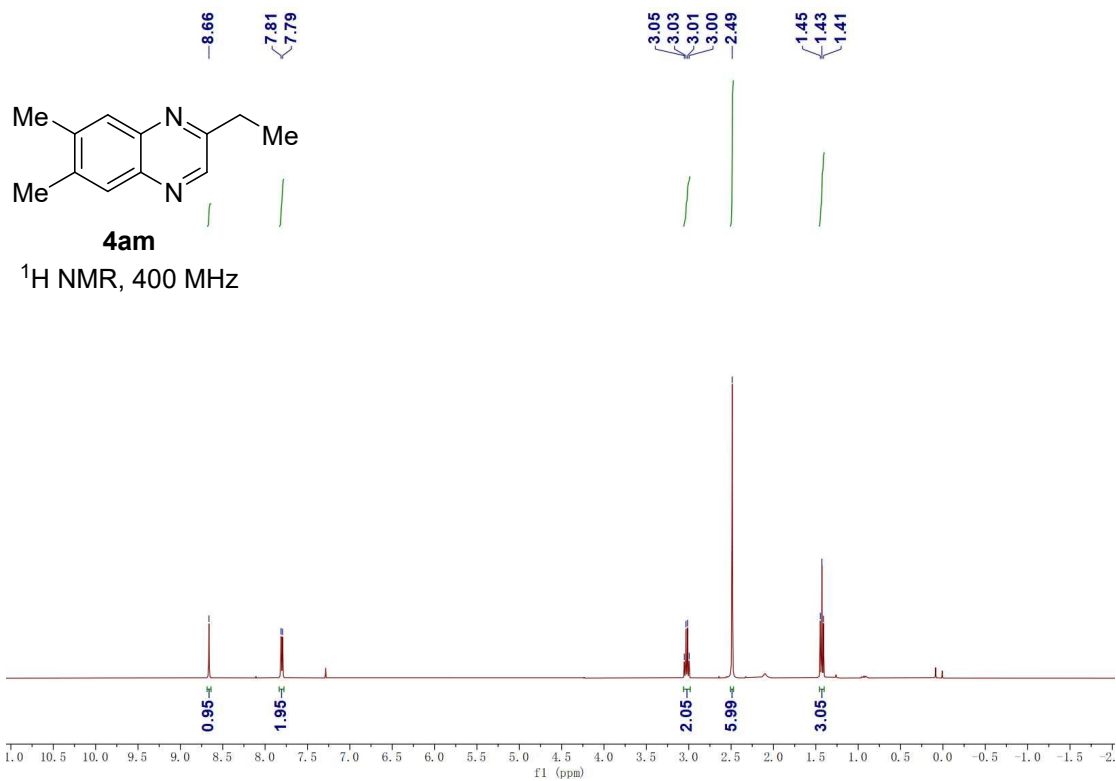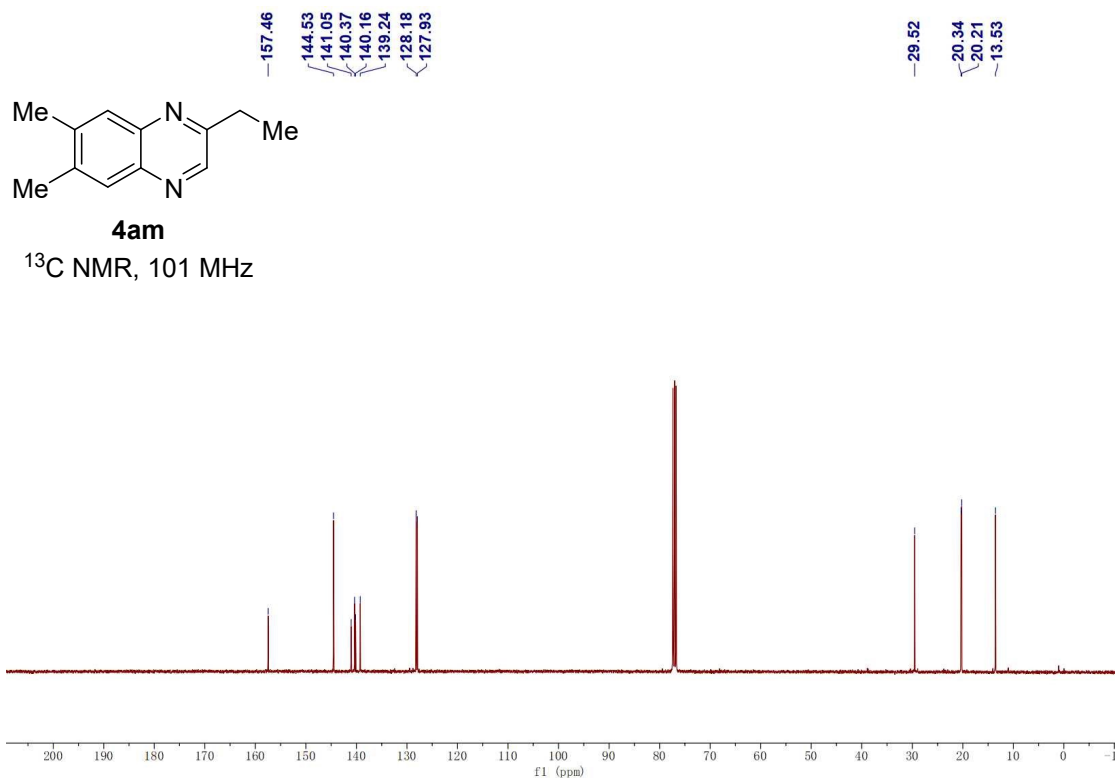

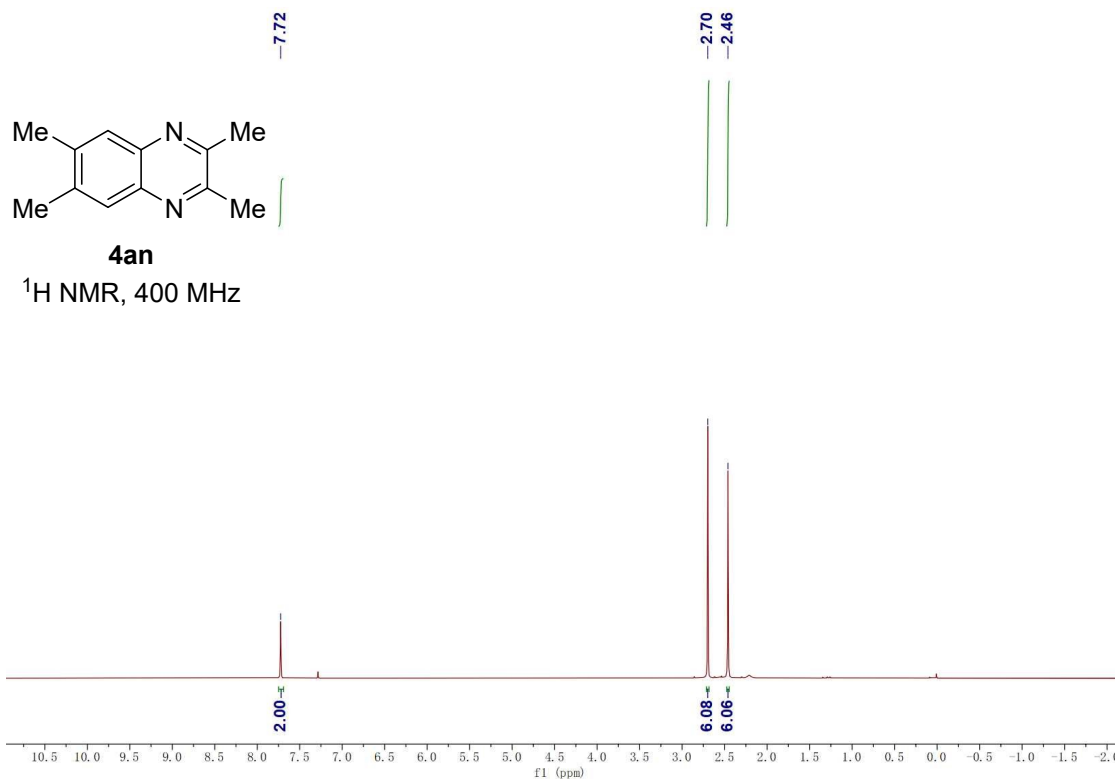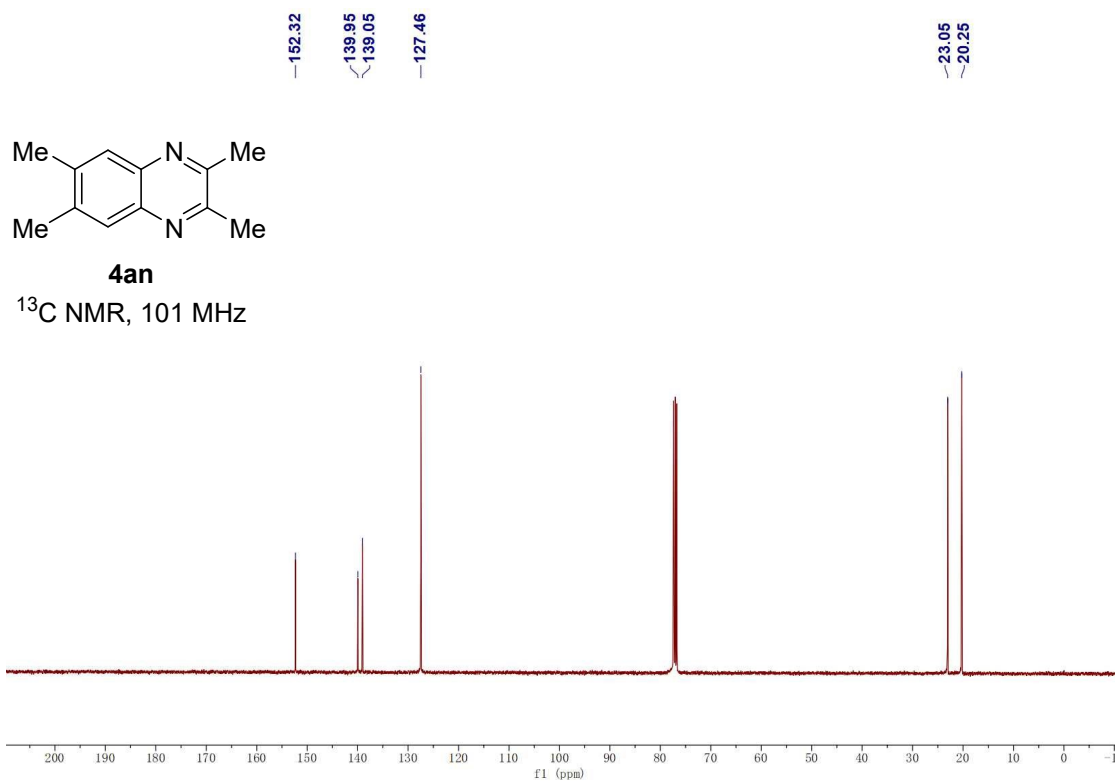

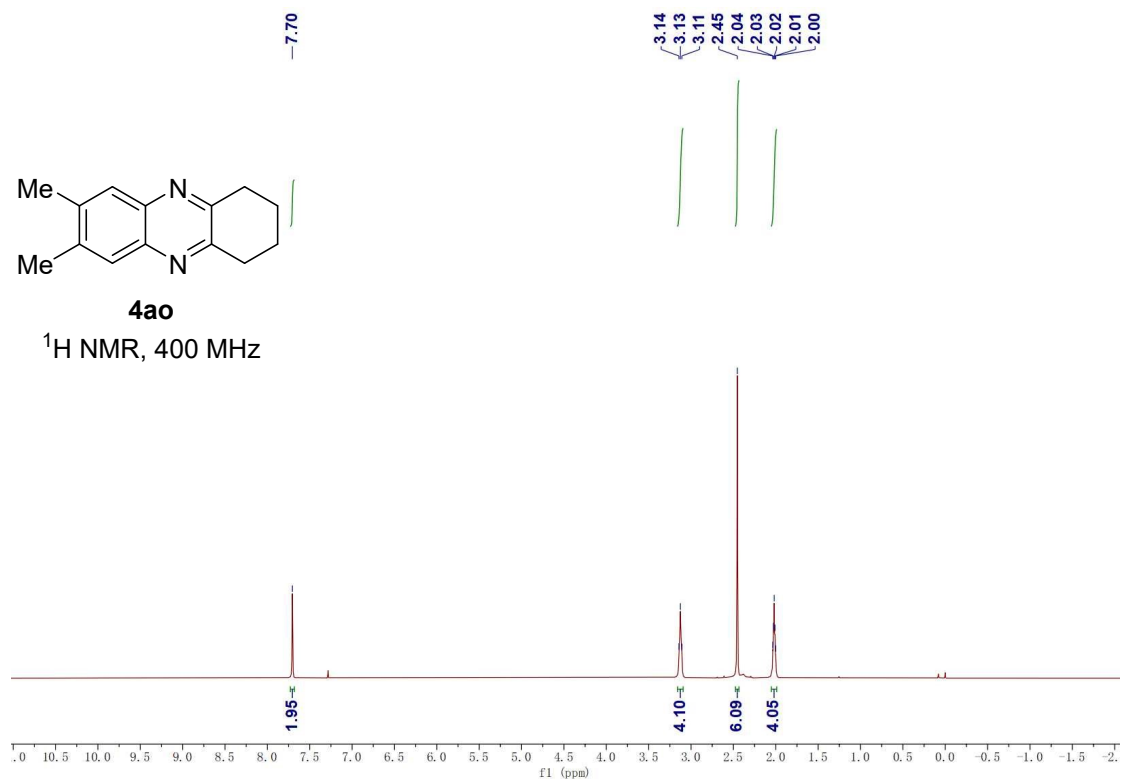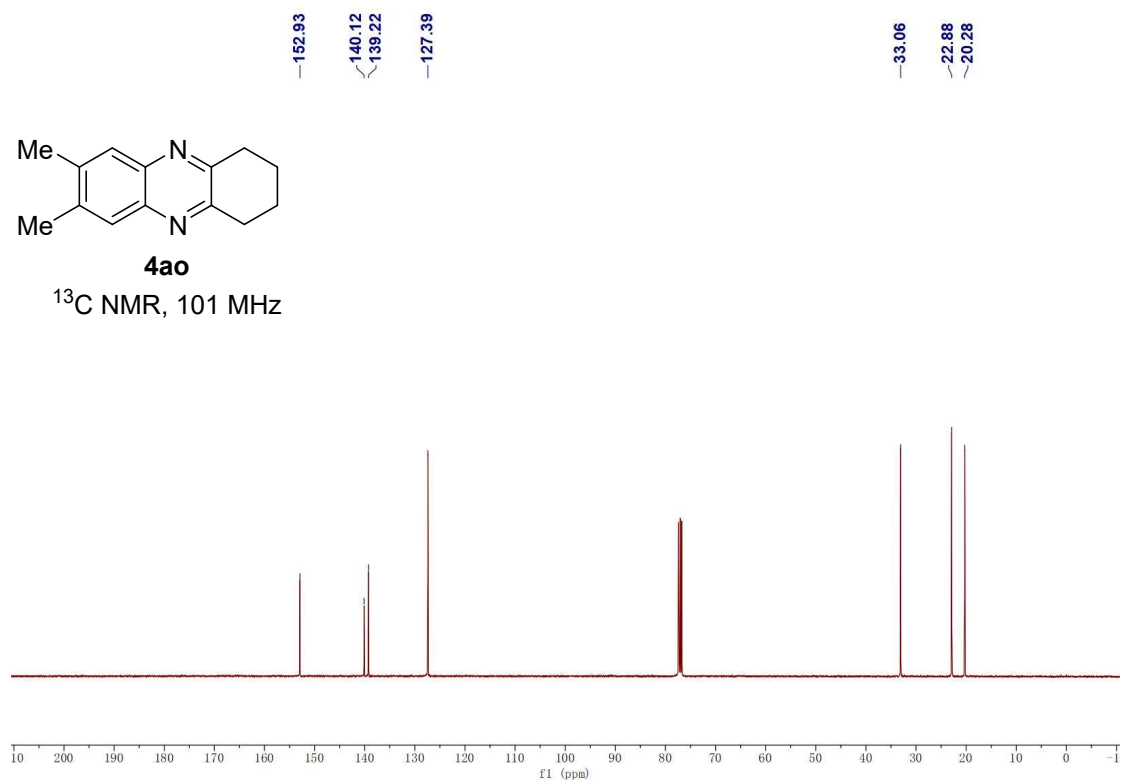



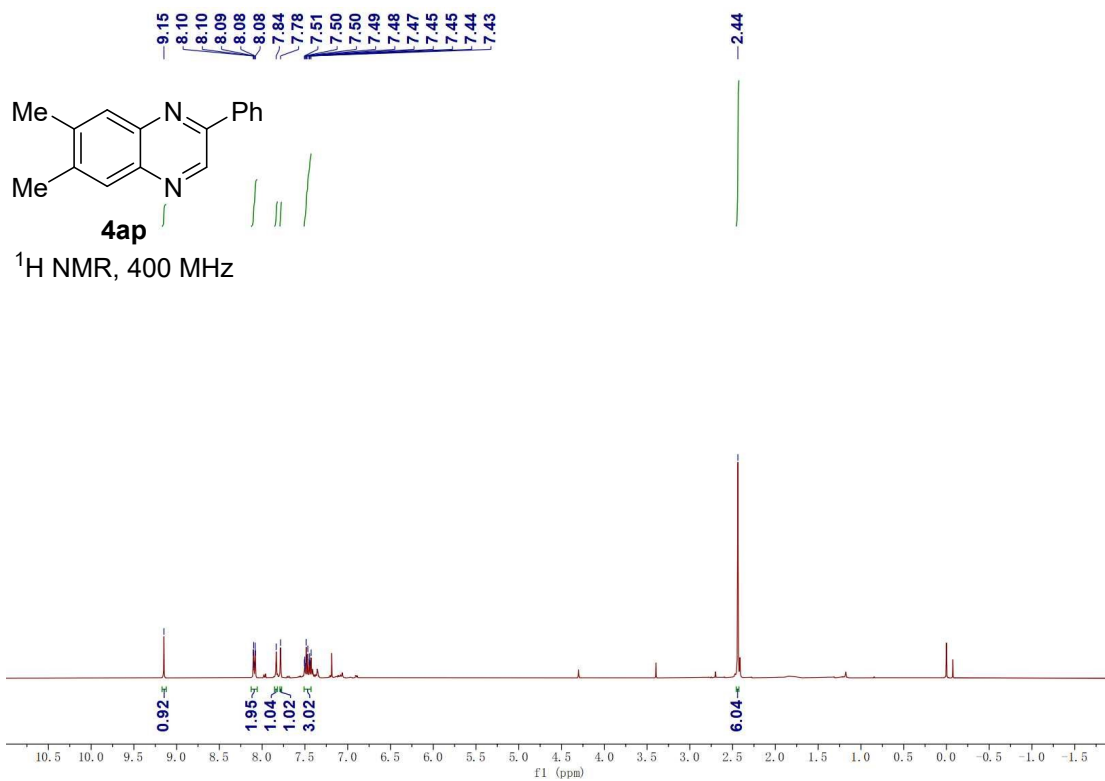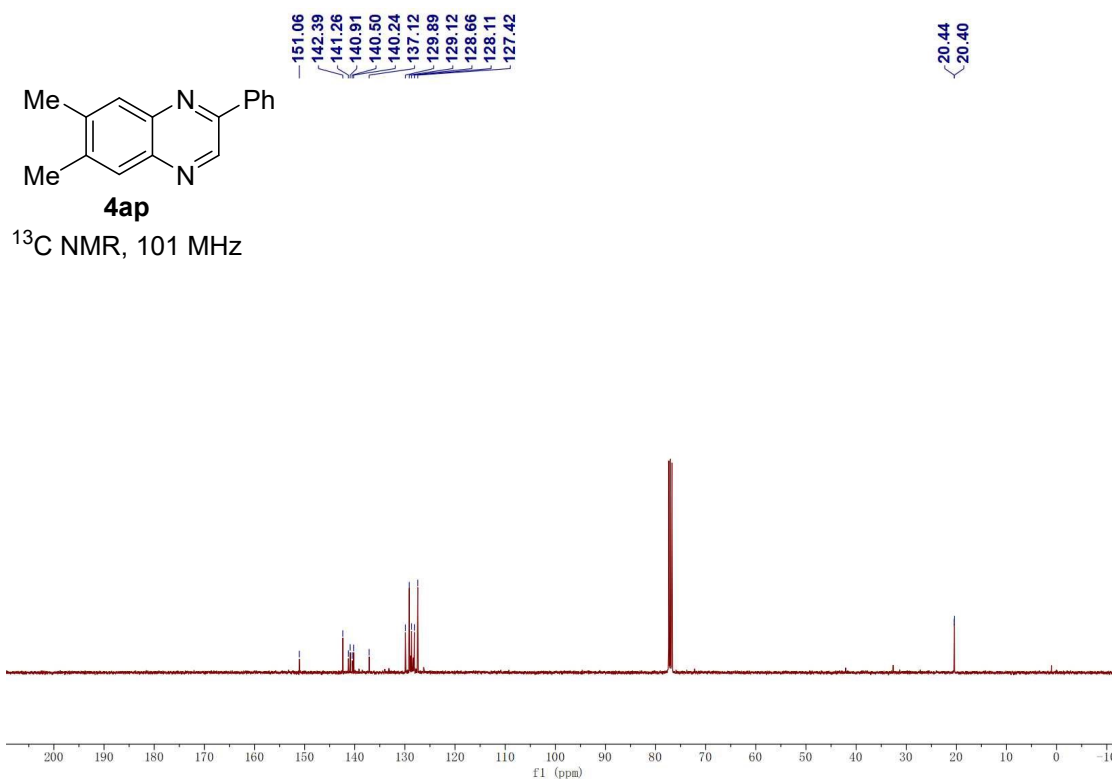

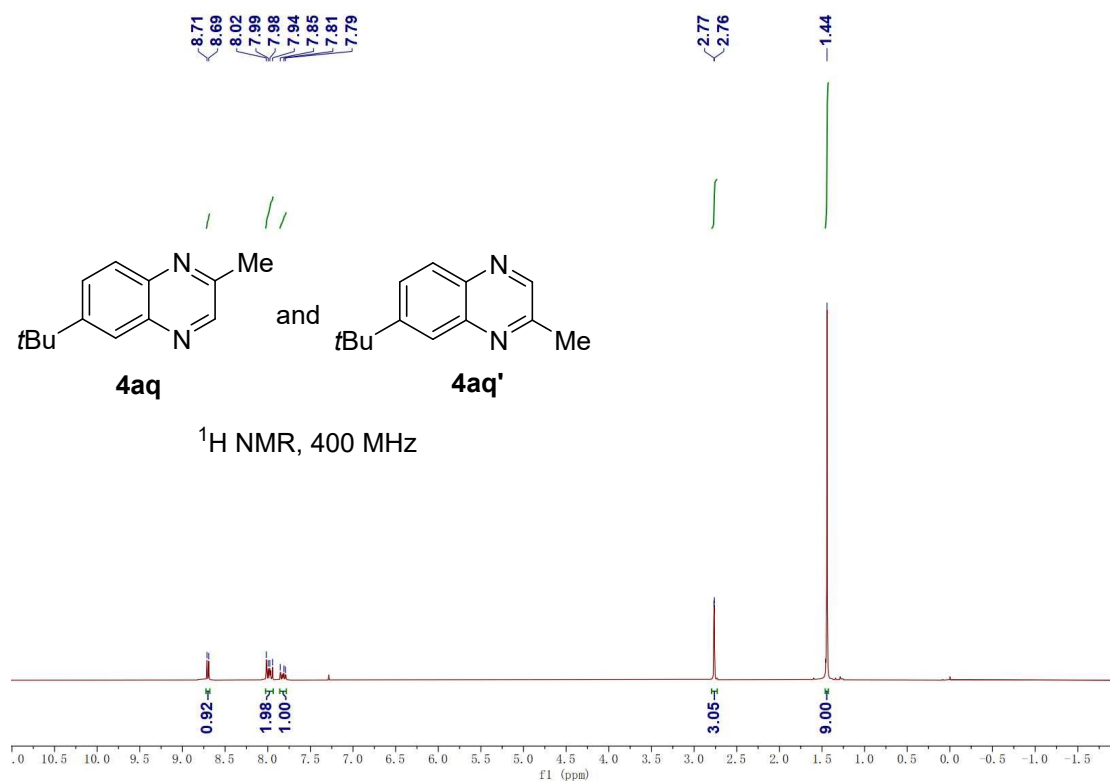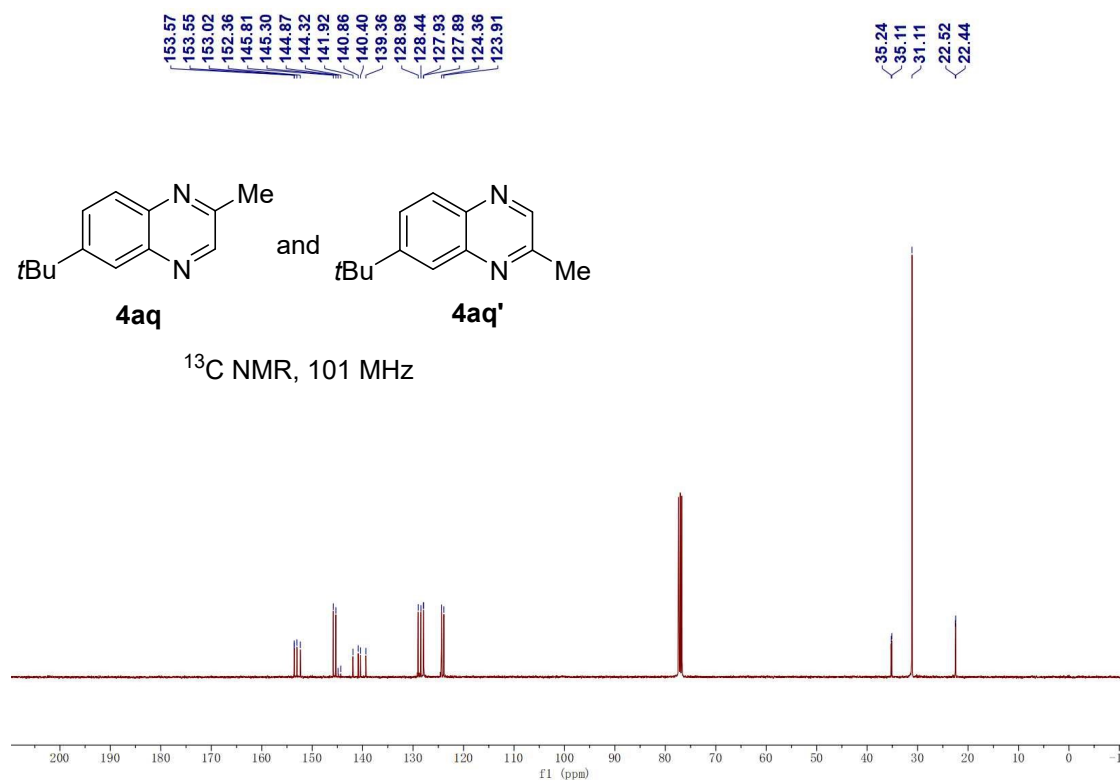

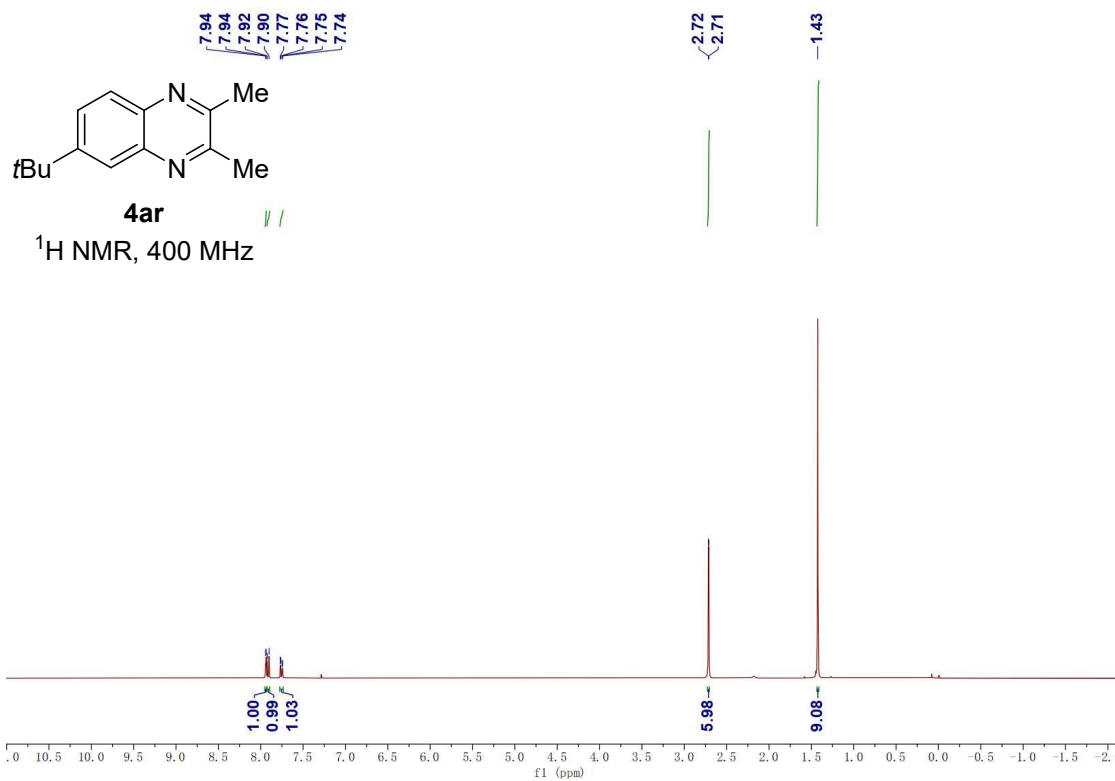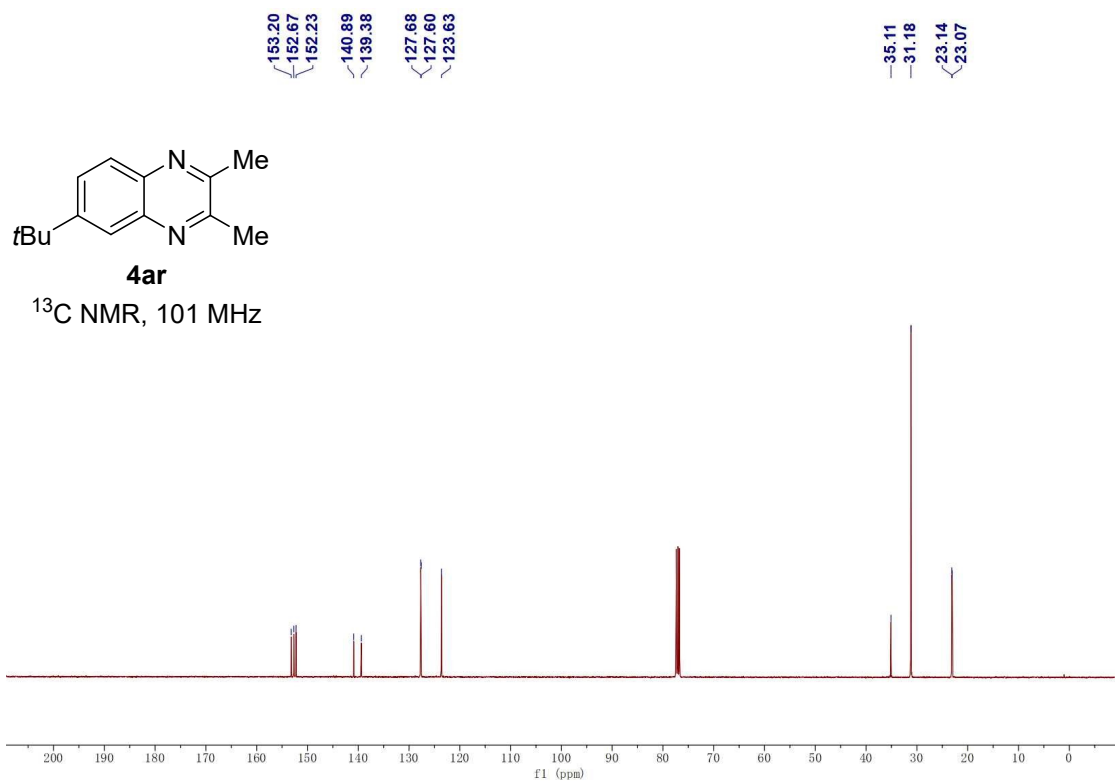

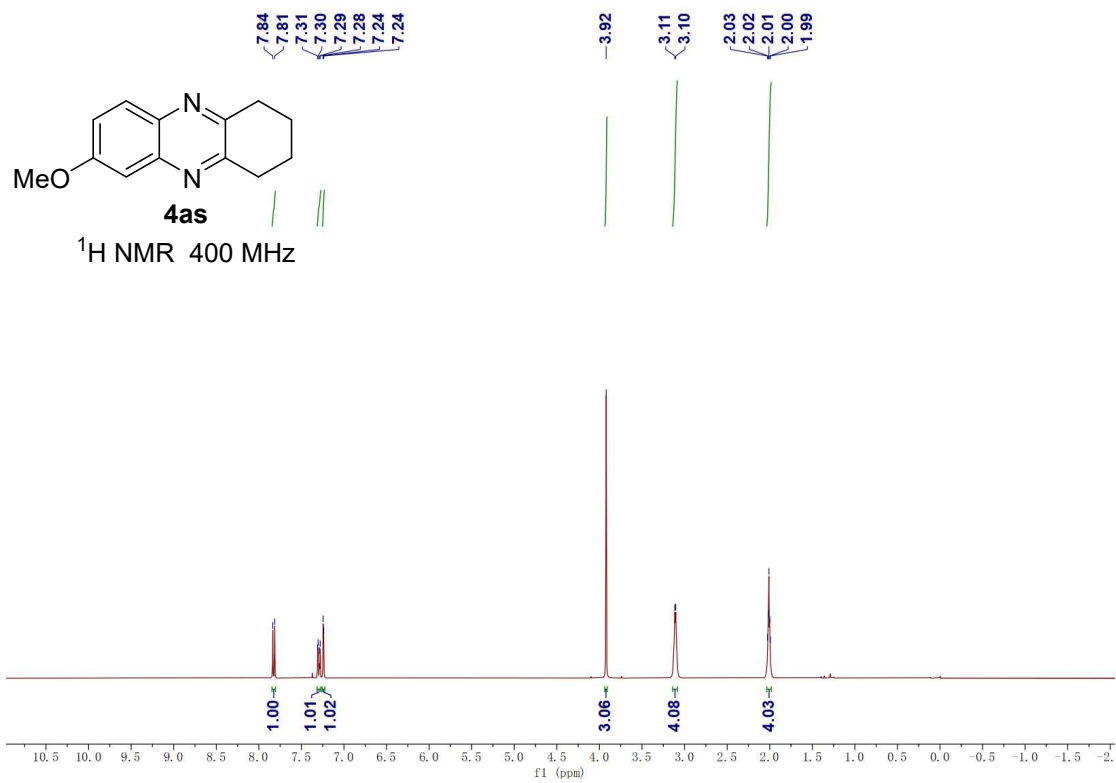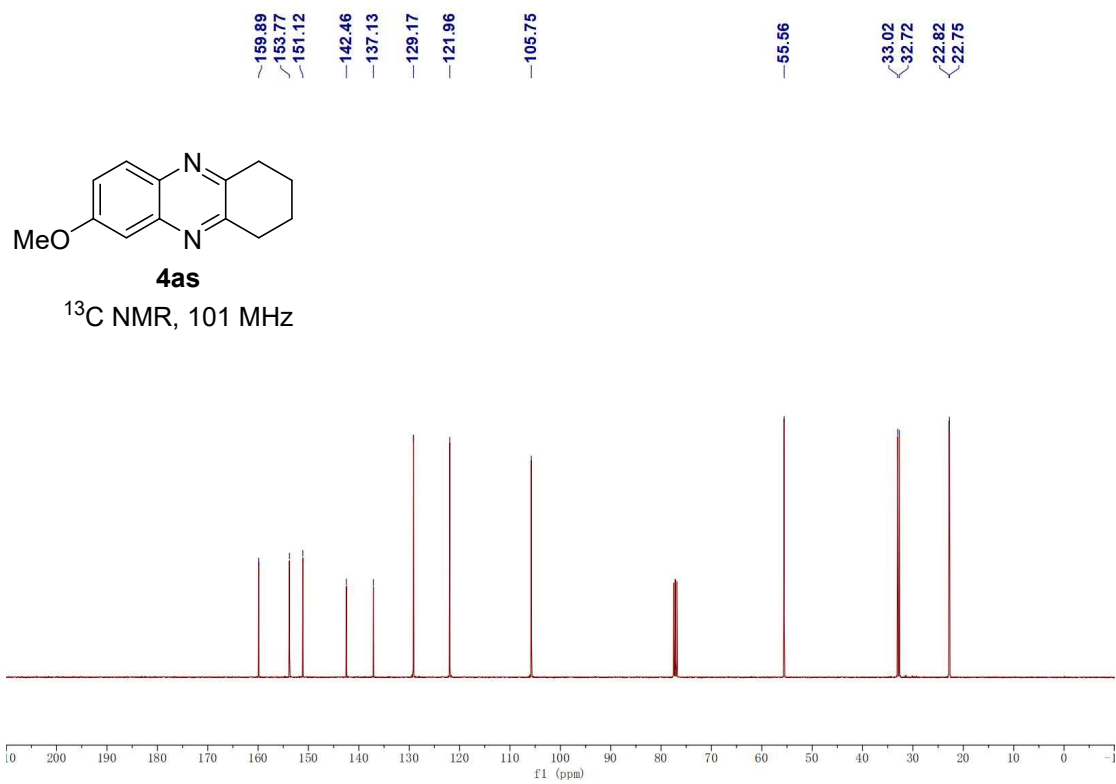

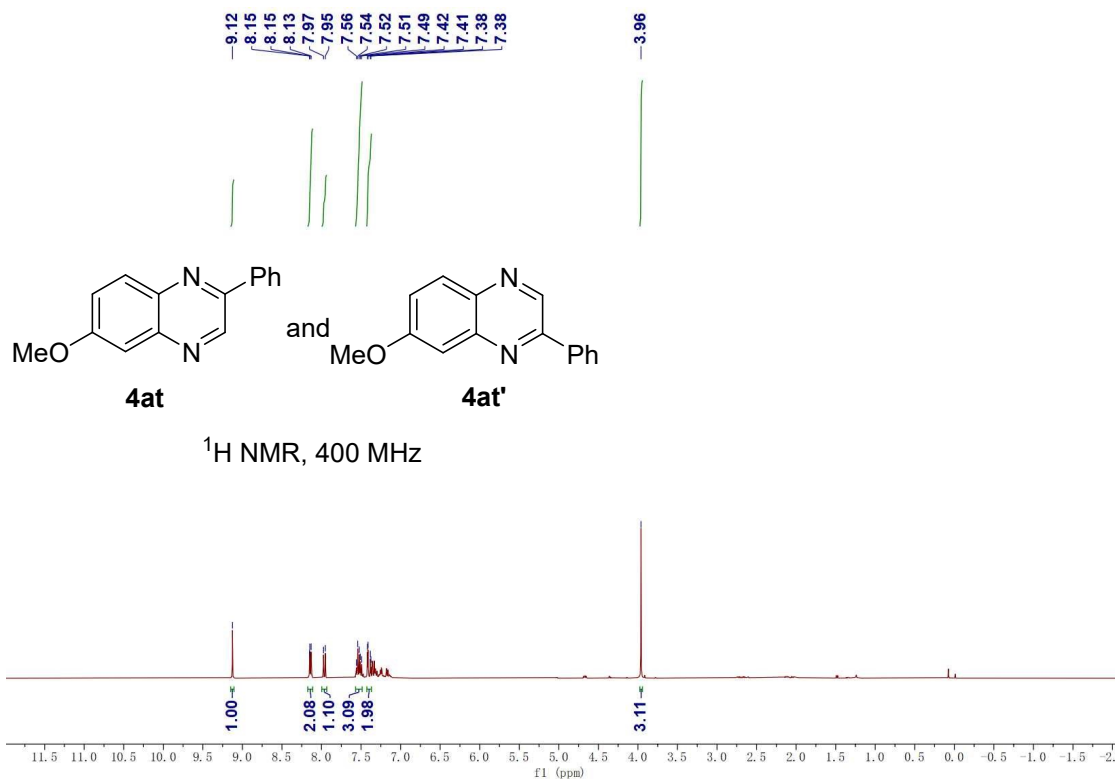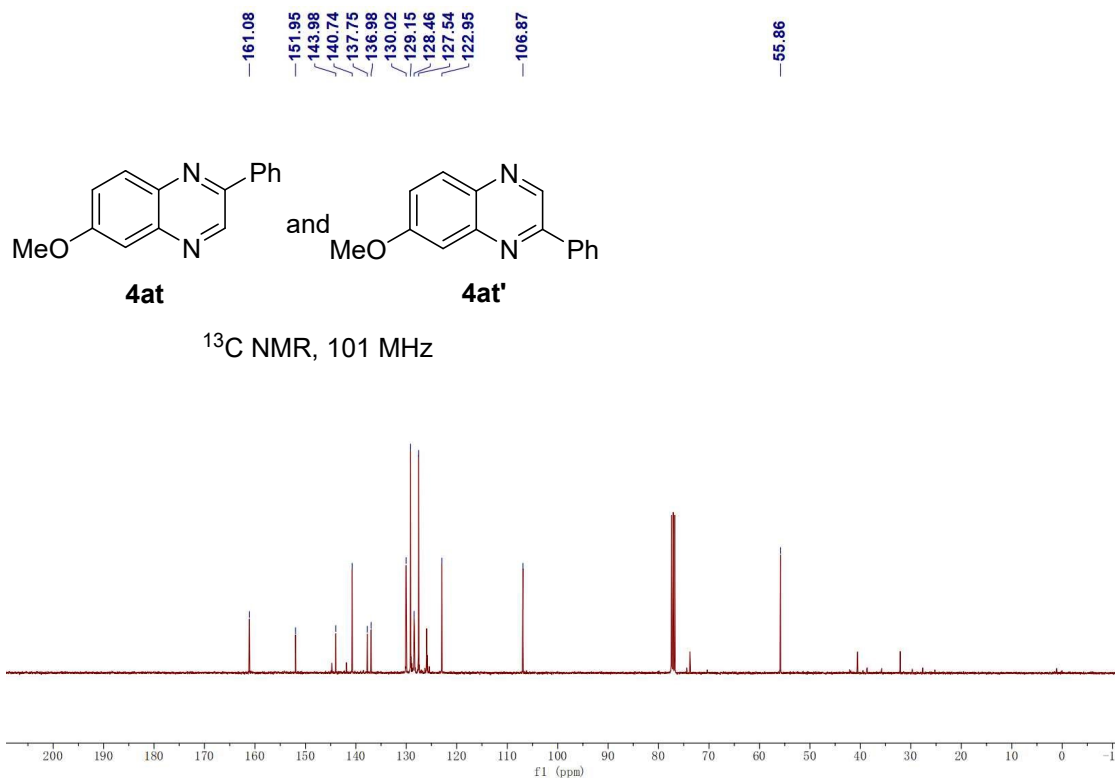

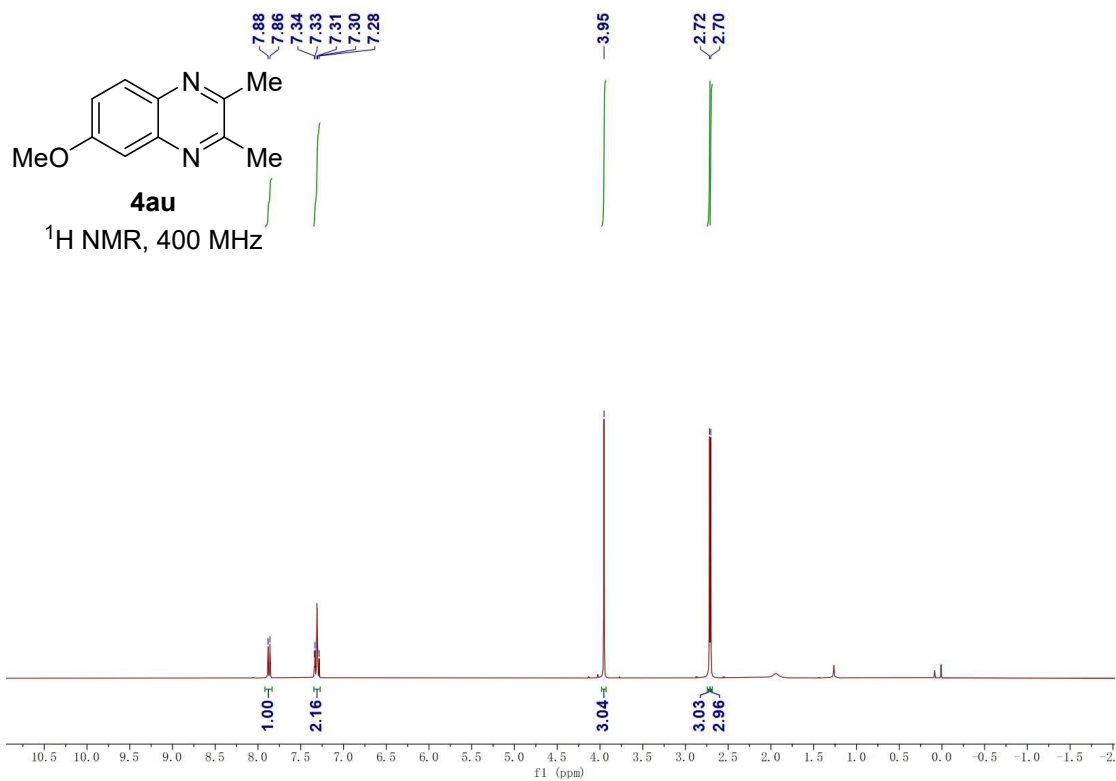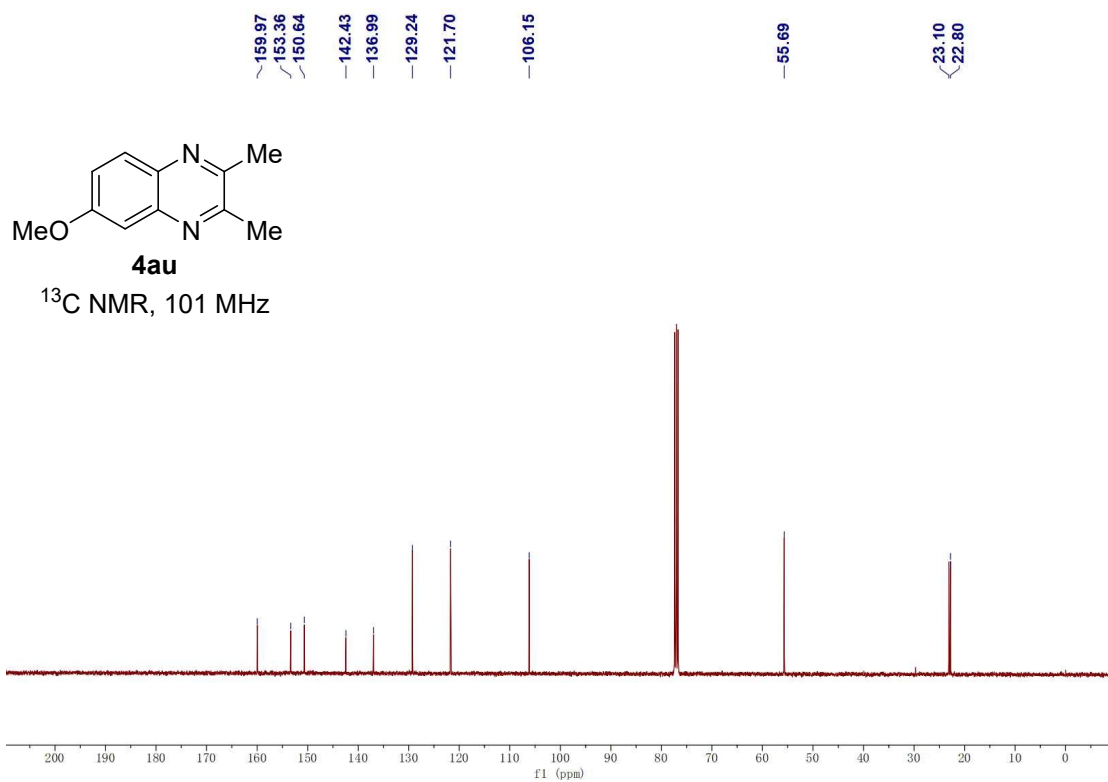

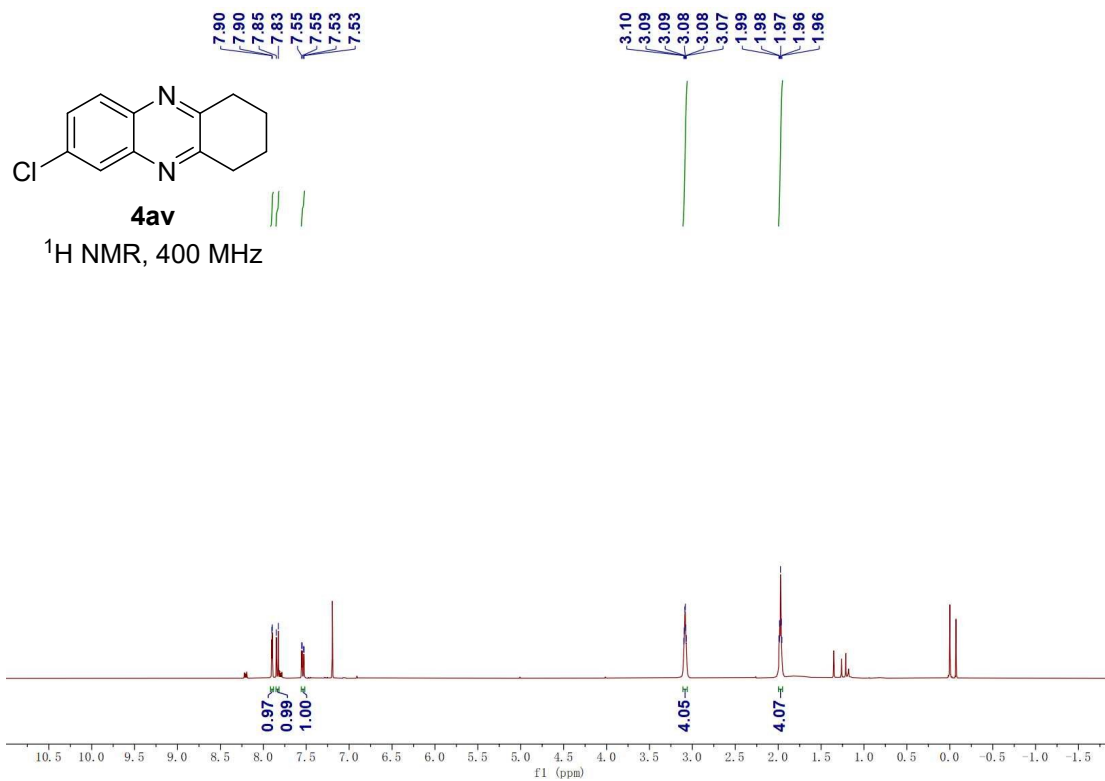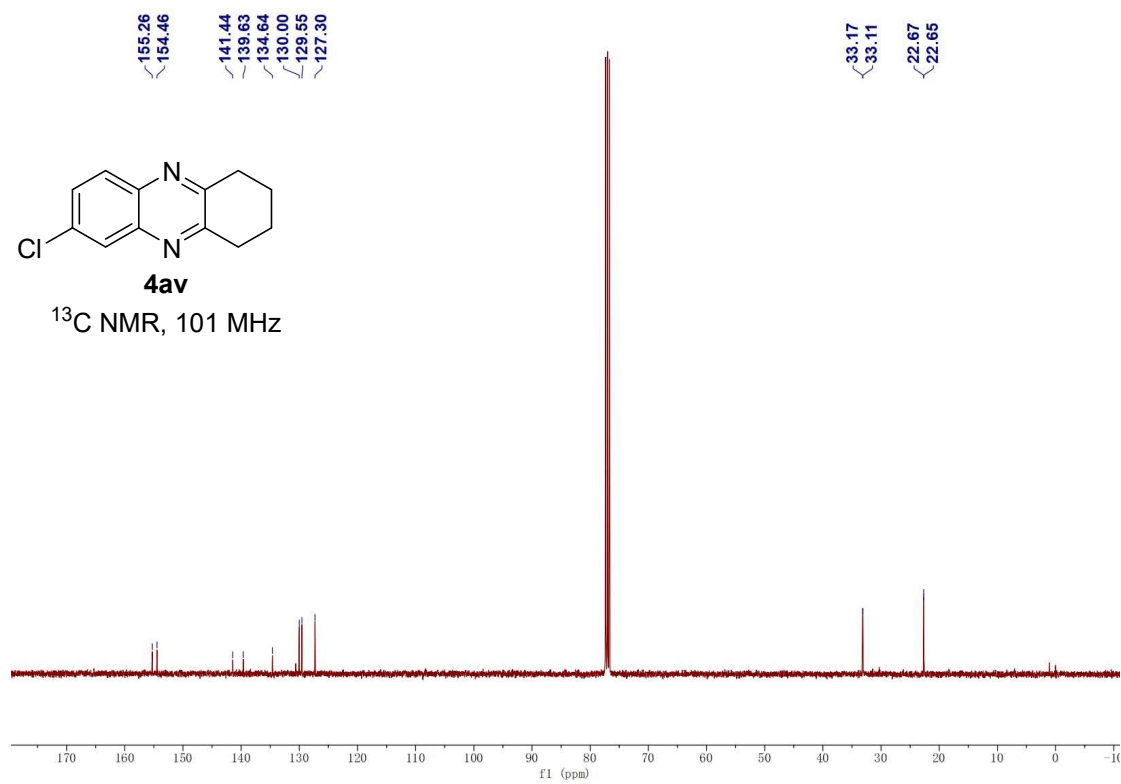

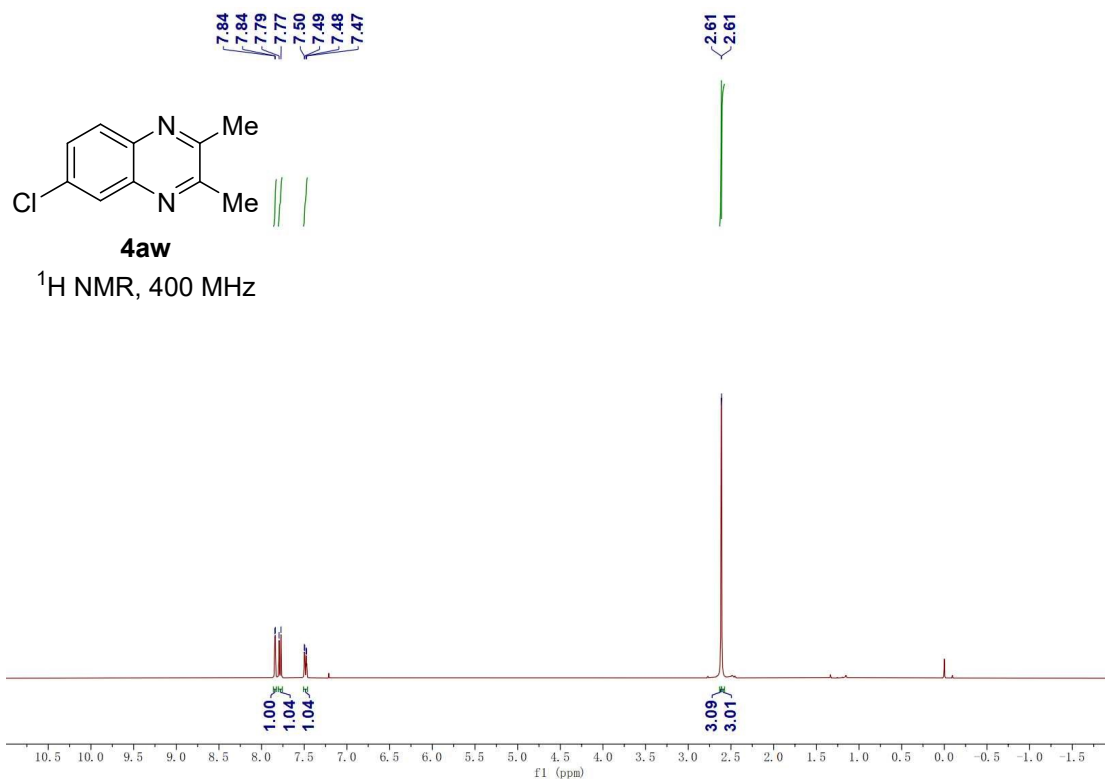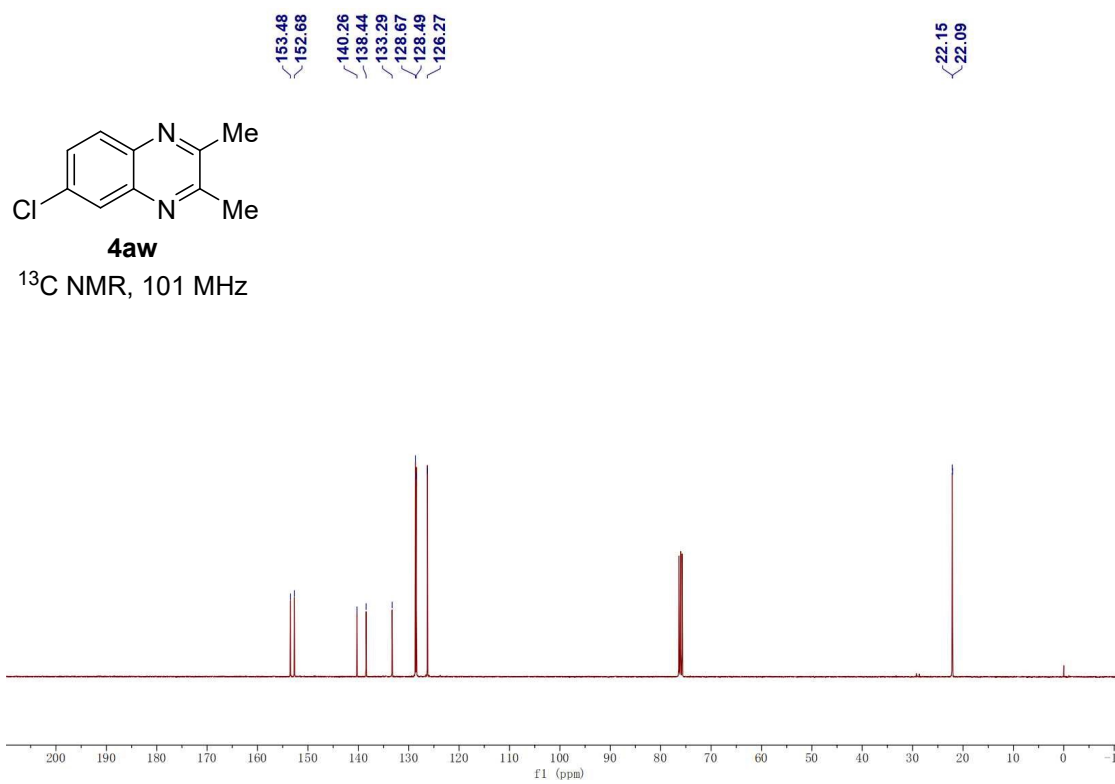



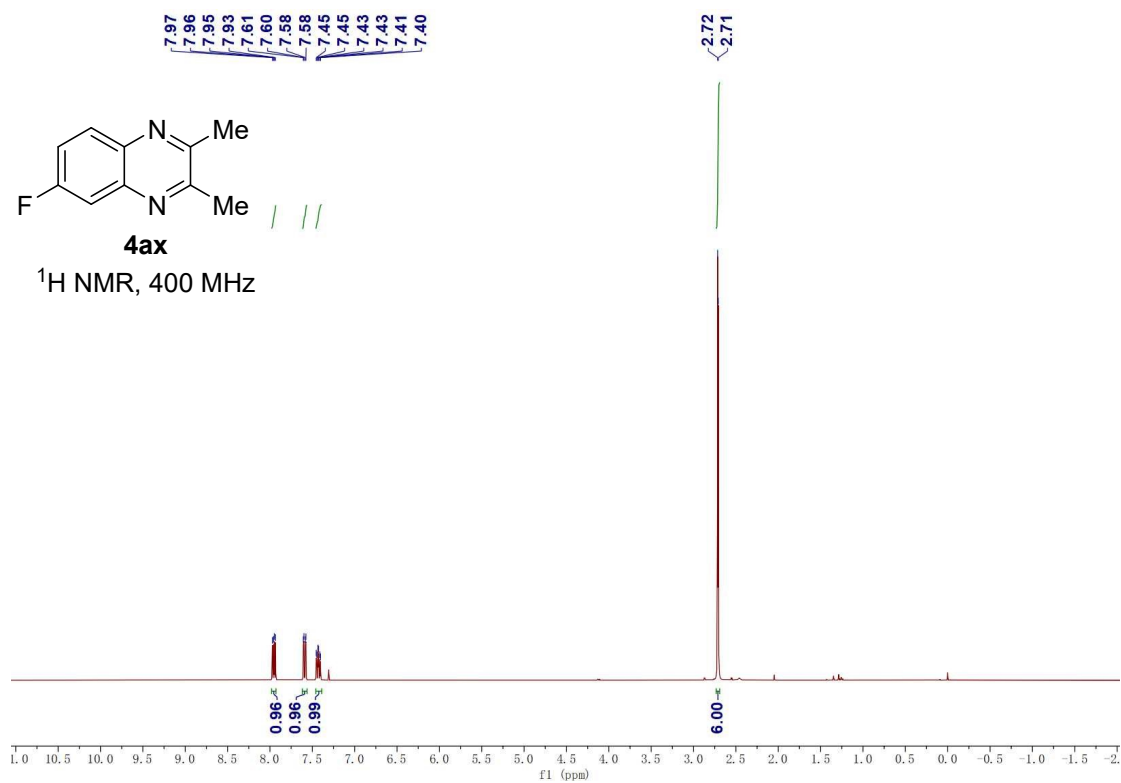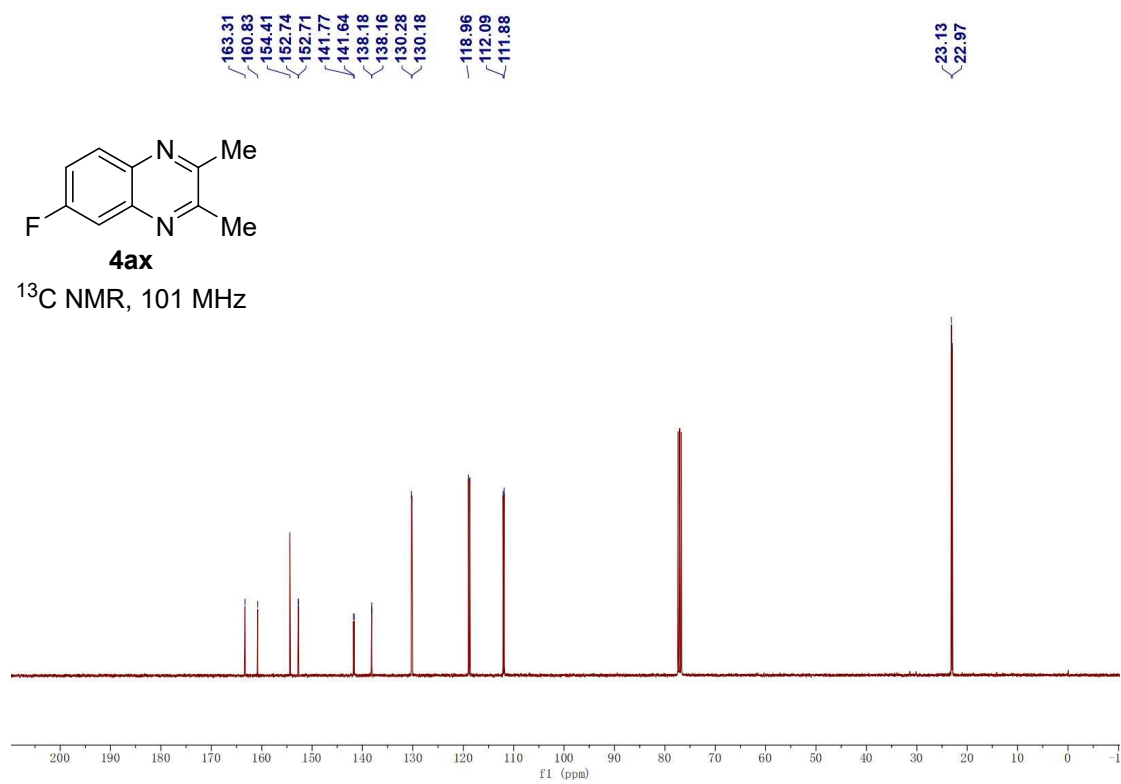

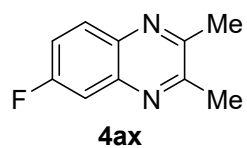

<sup>19</sup>F NMR, 376 MHz

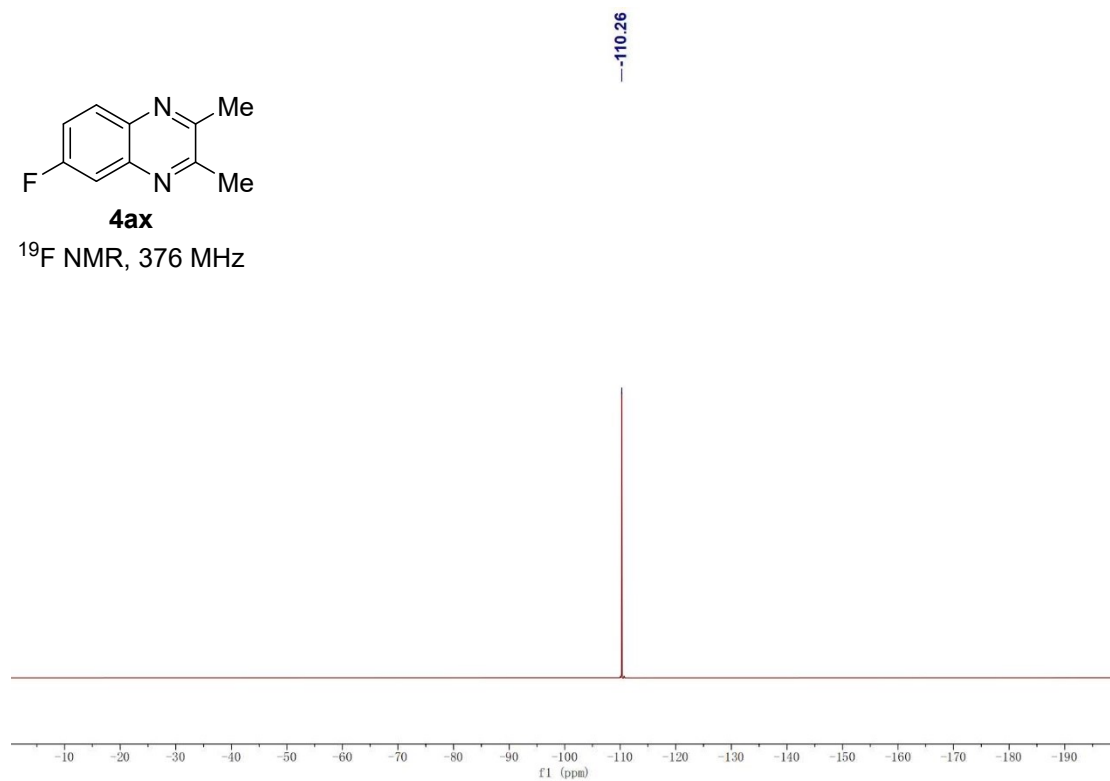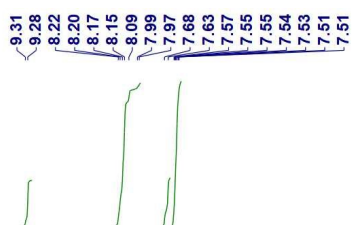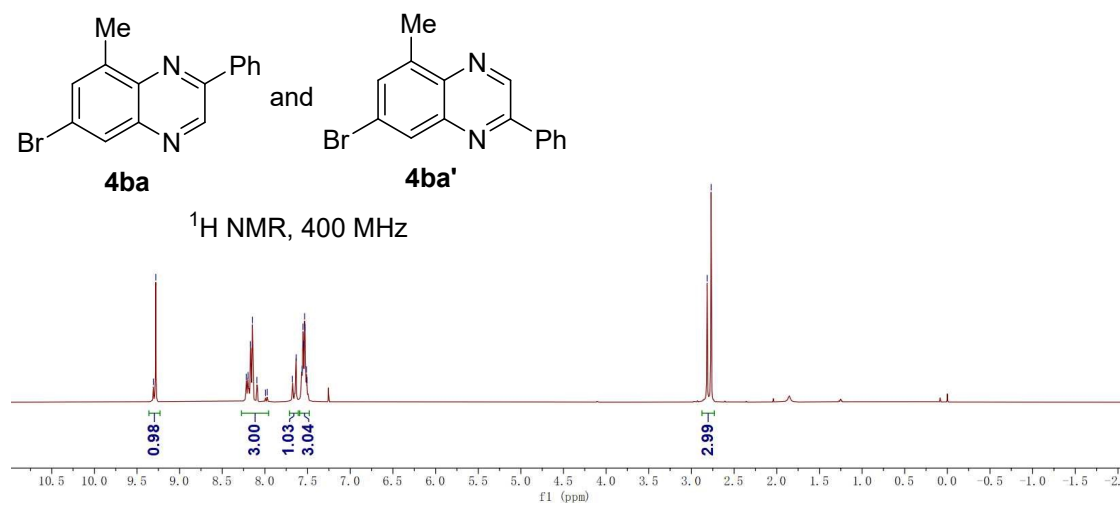

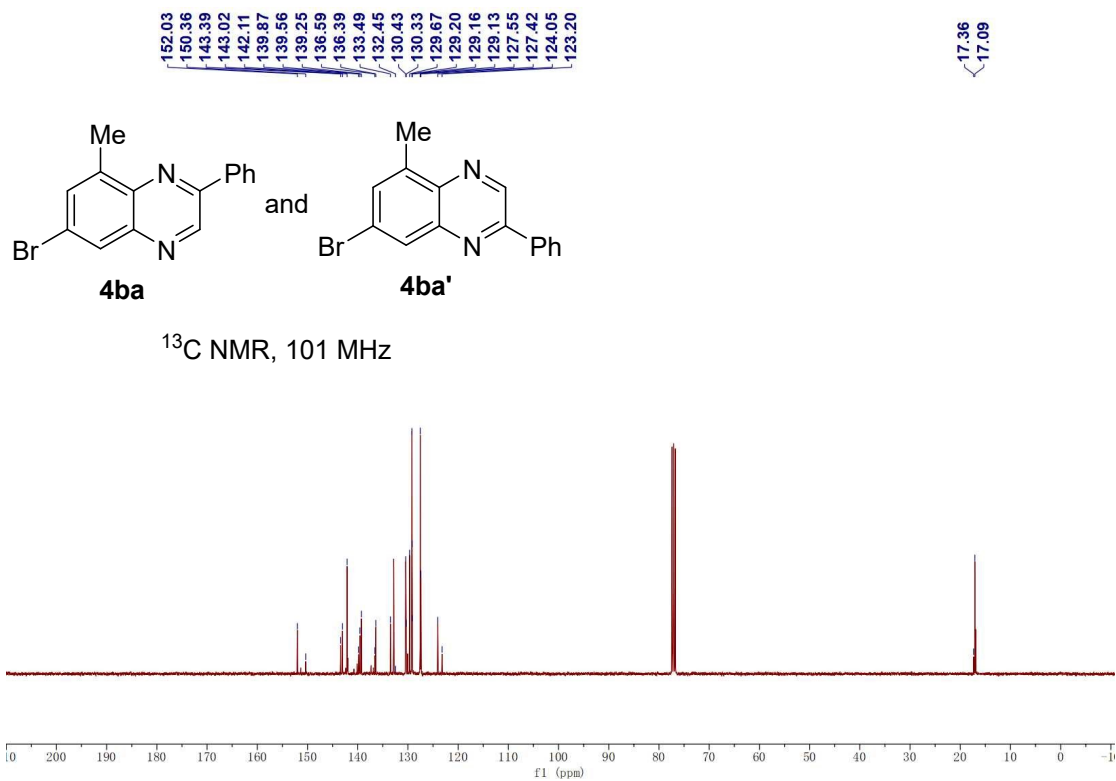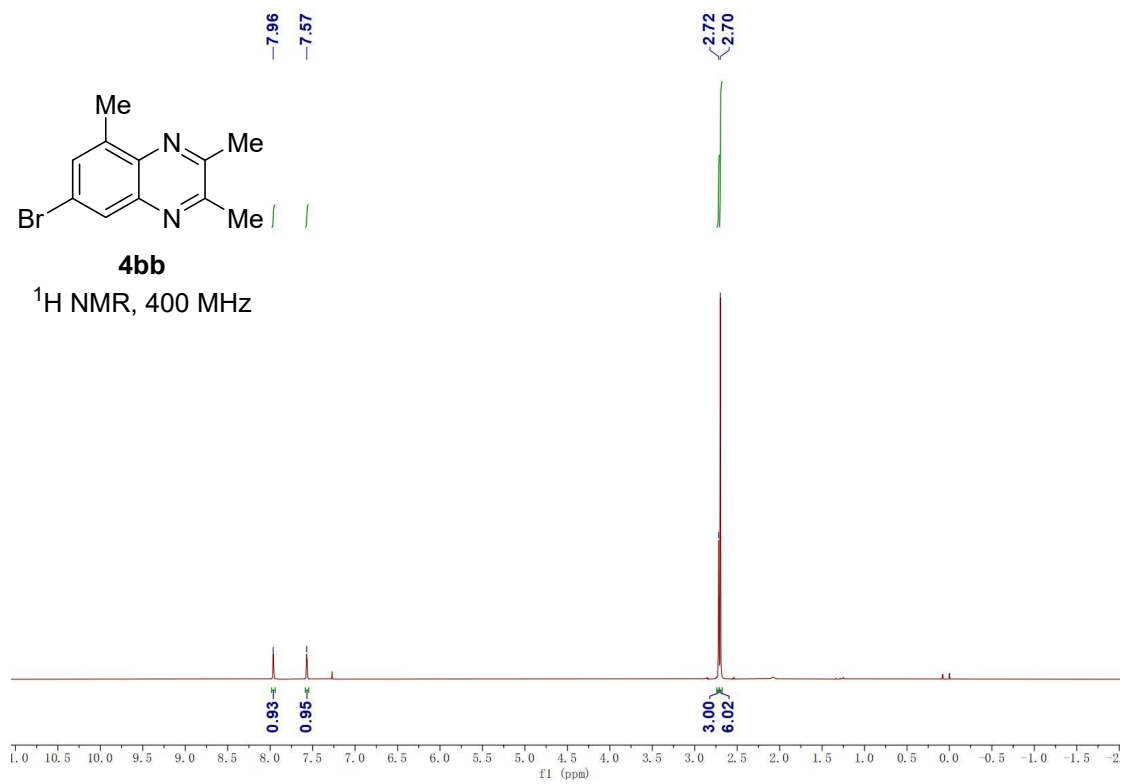

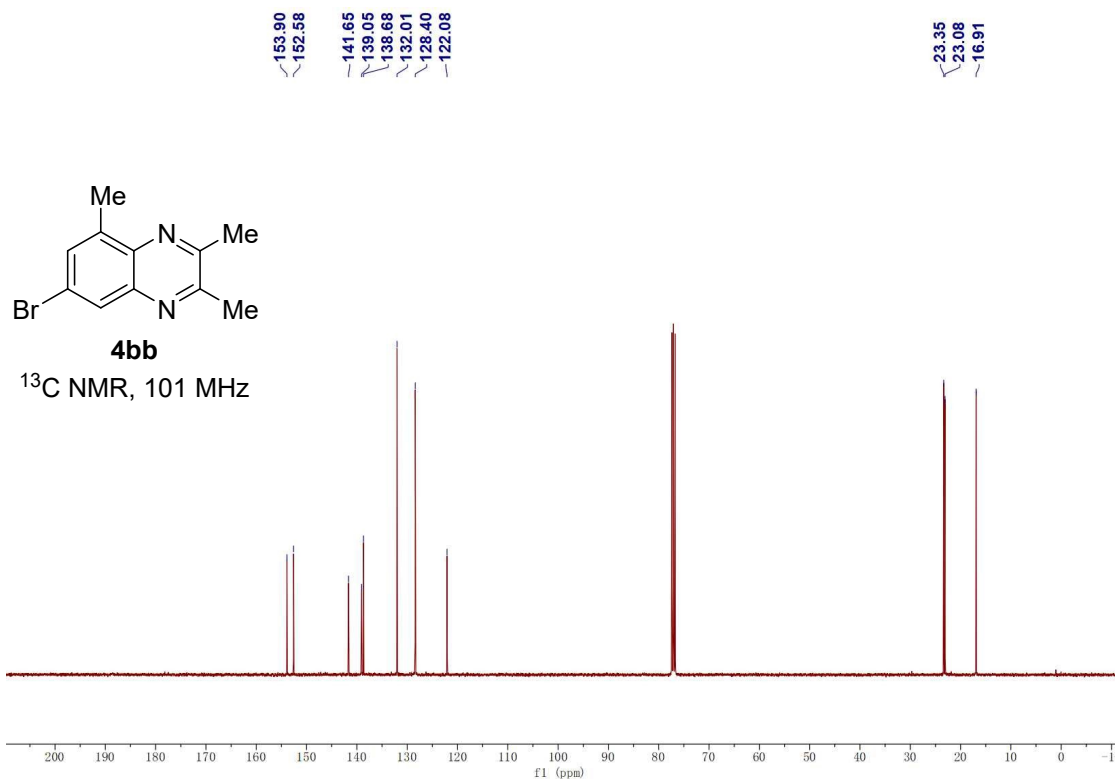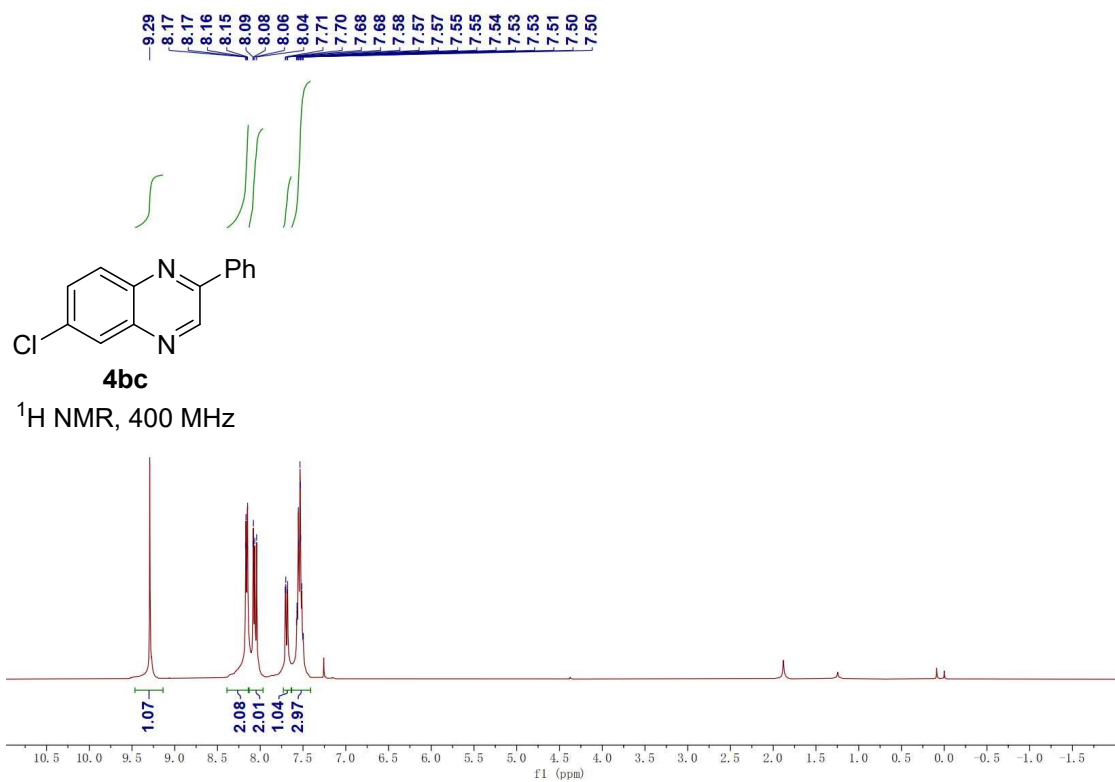

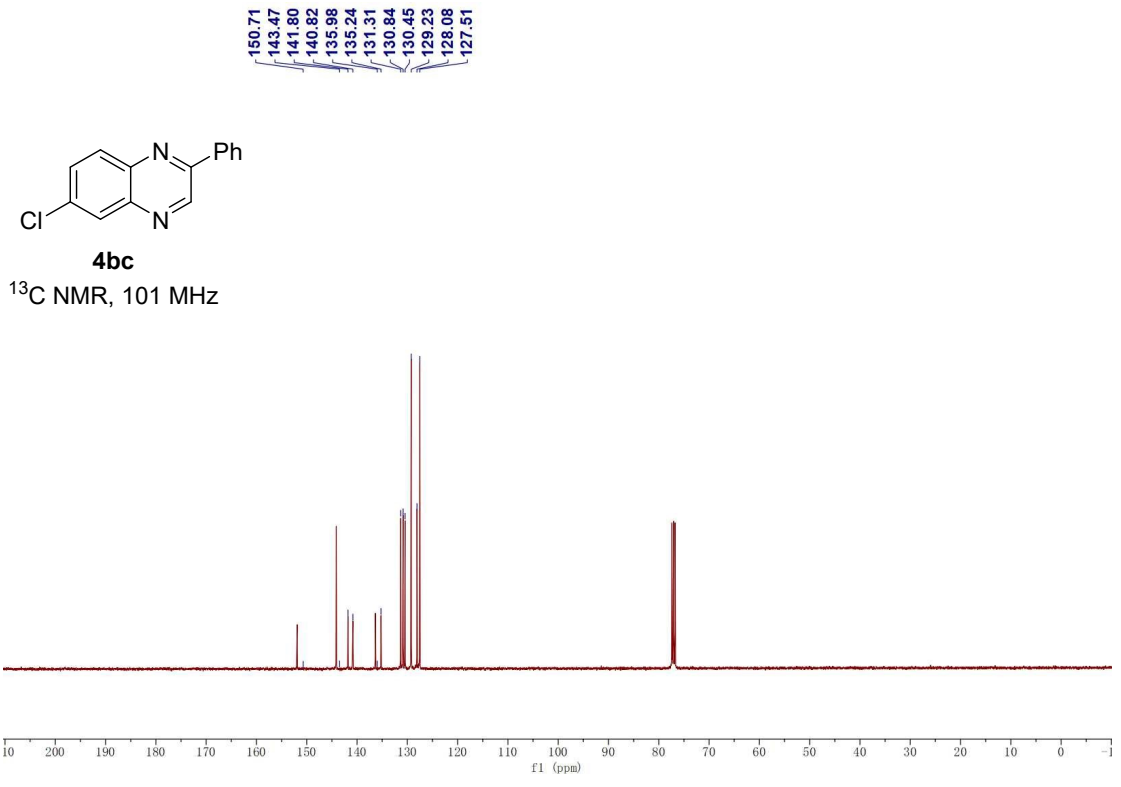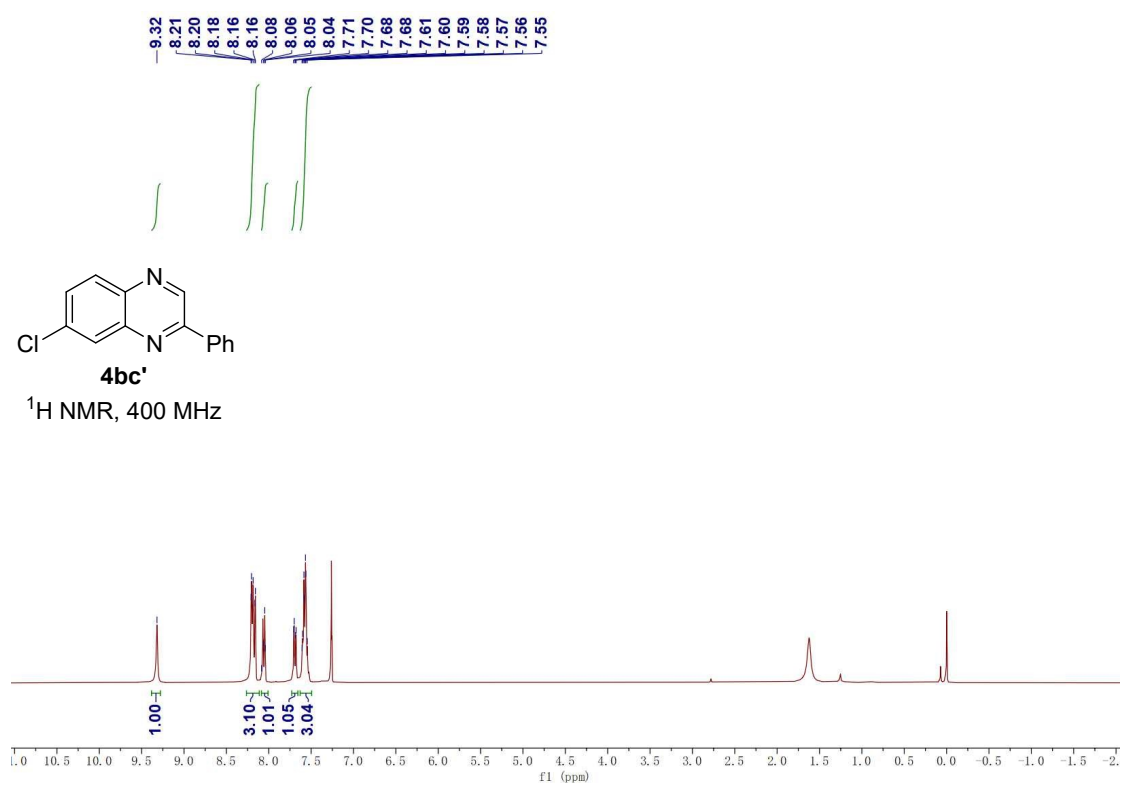

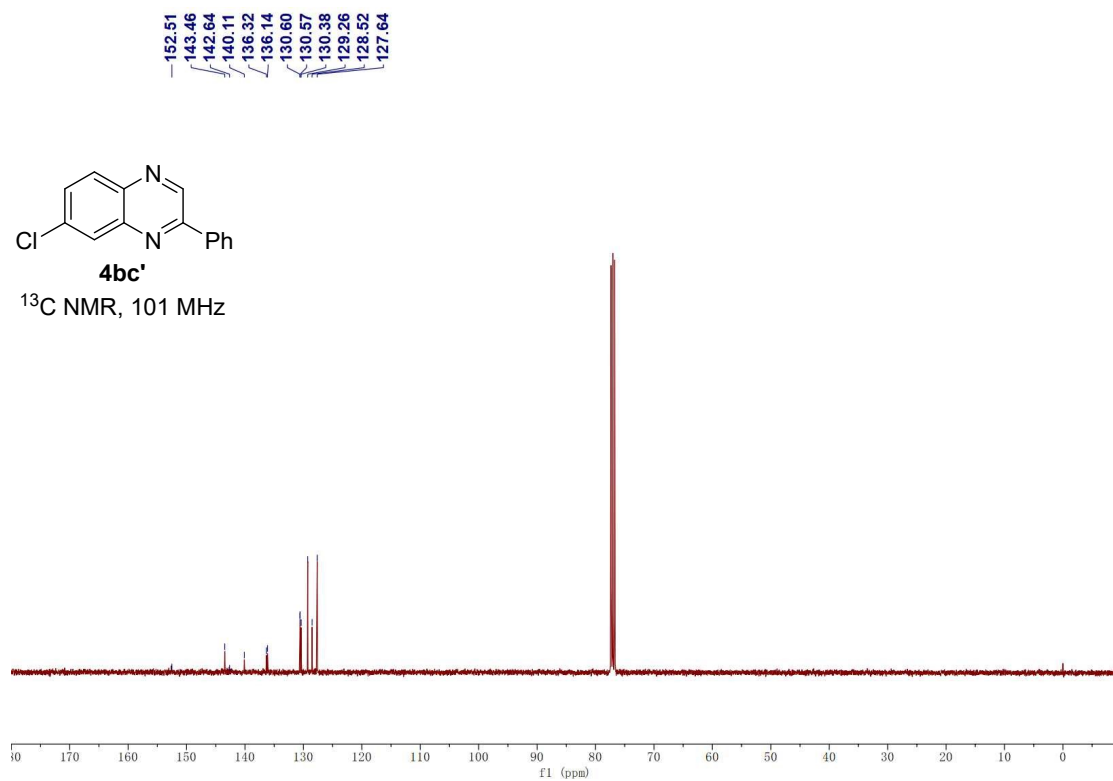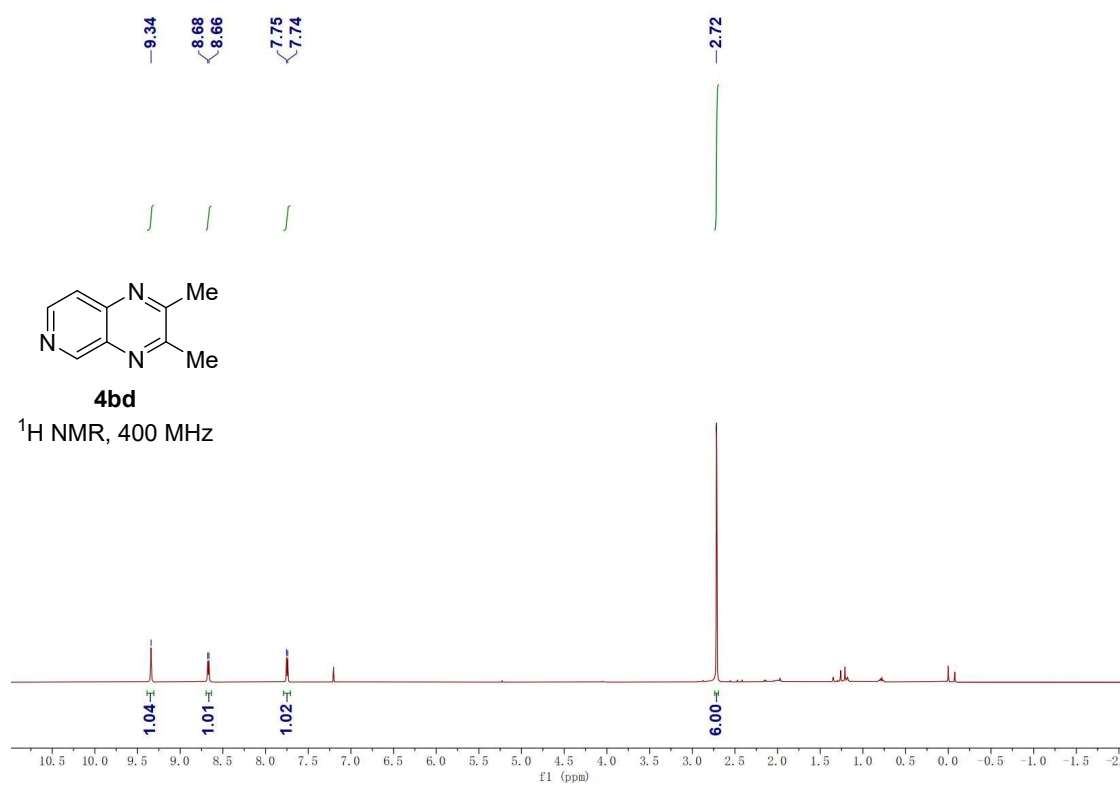

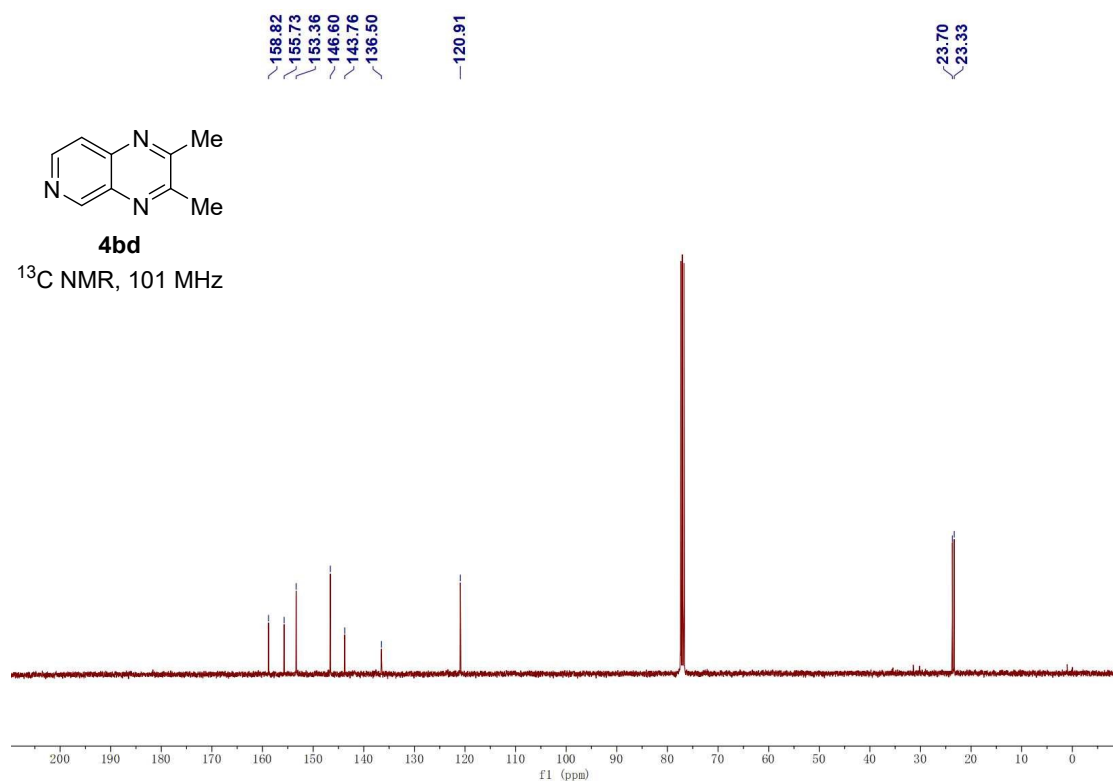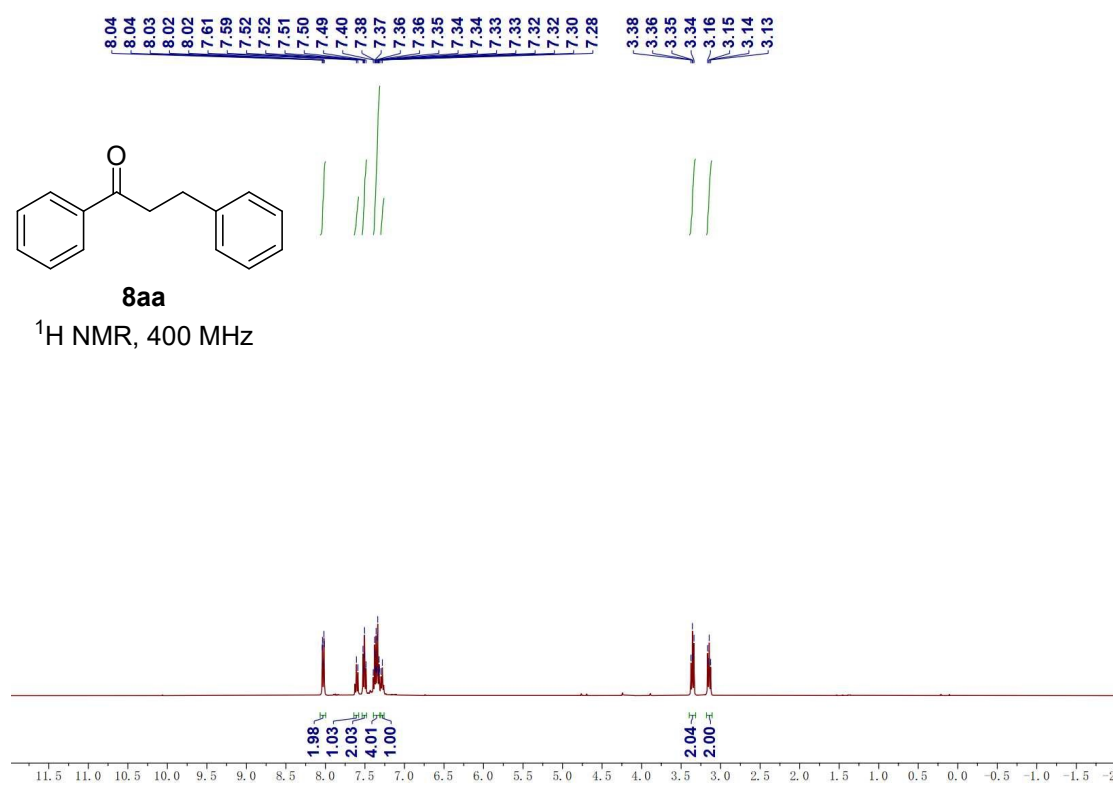

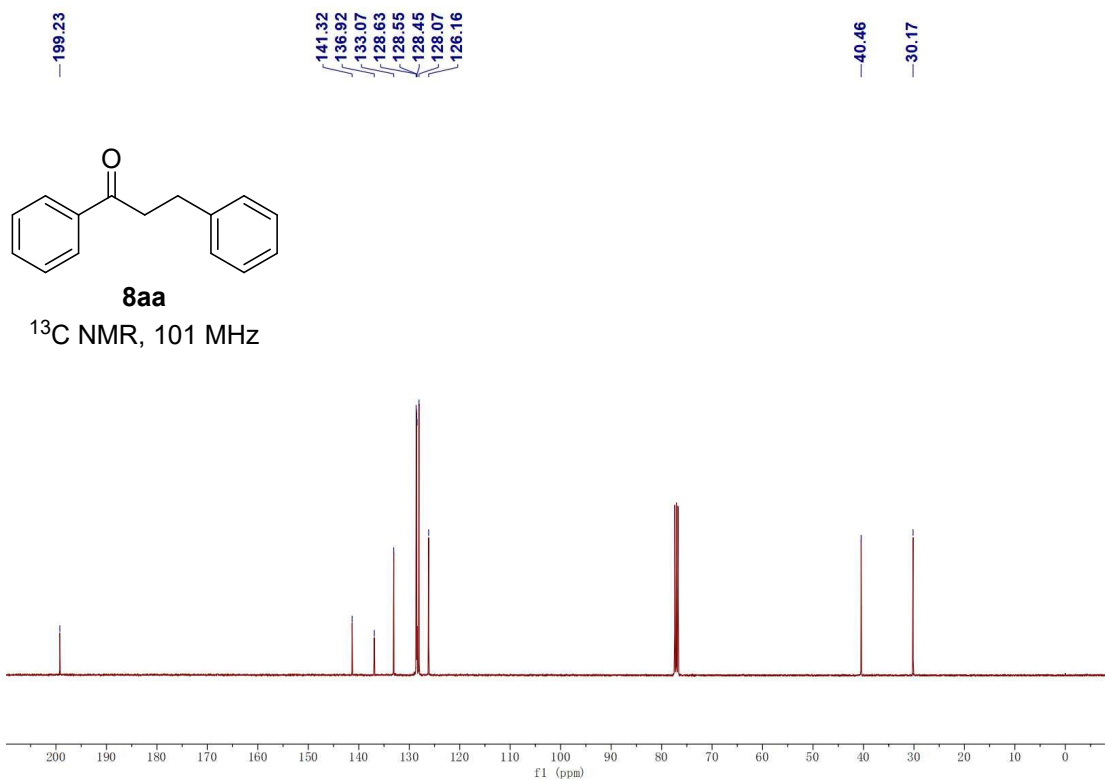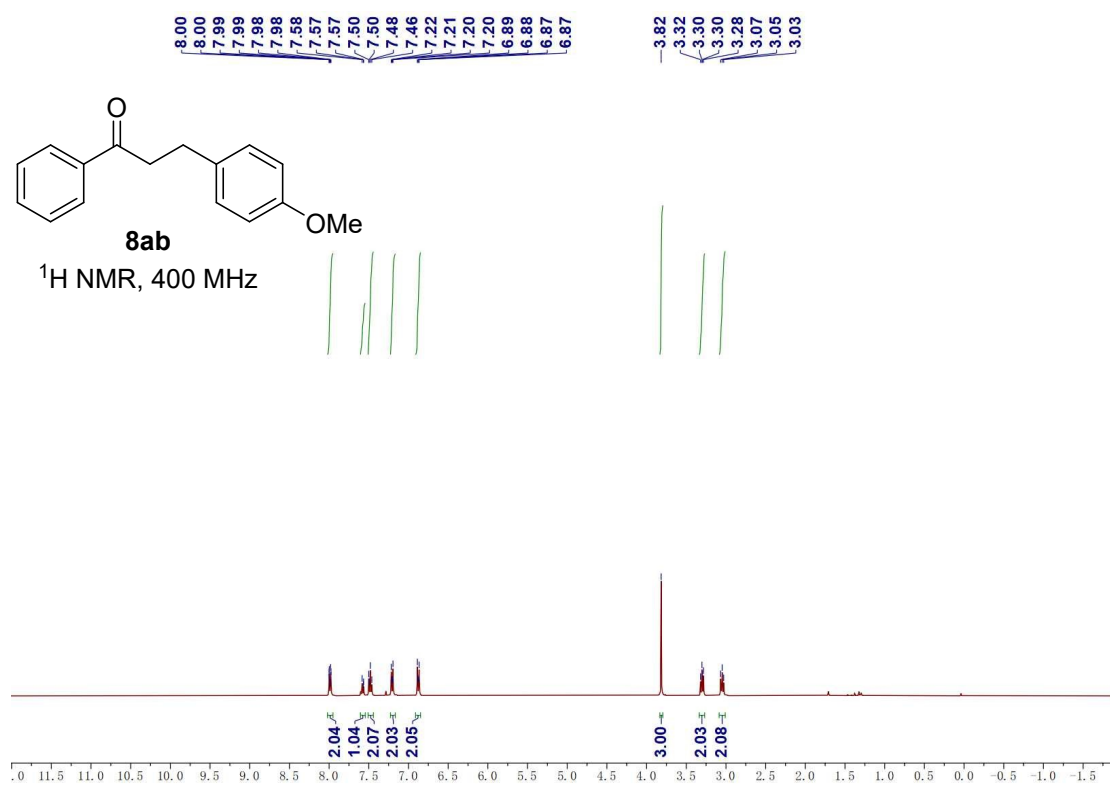



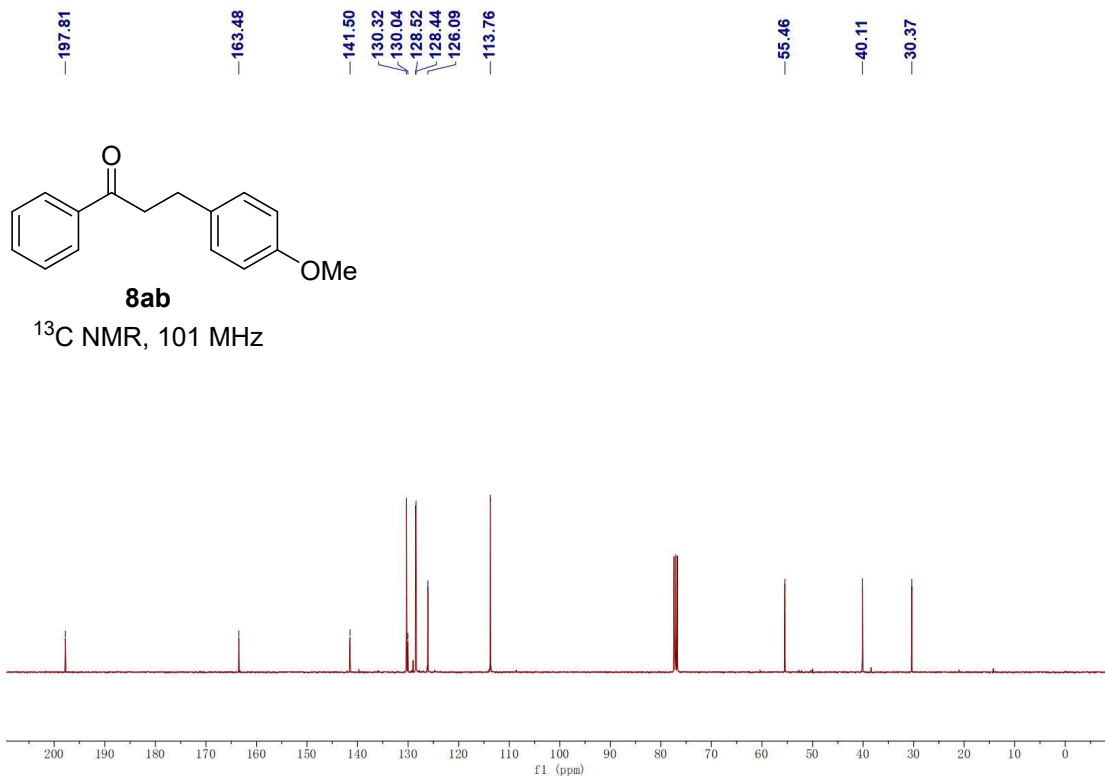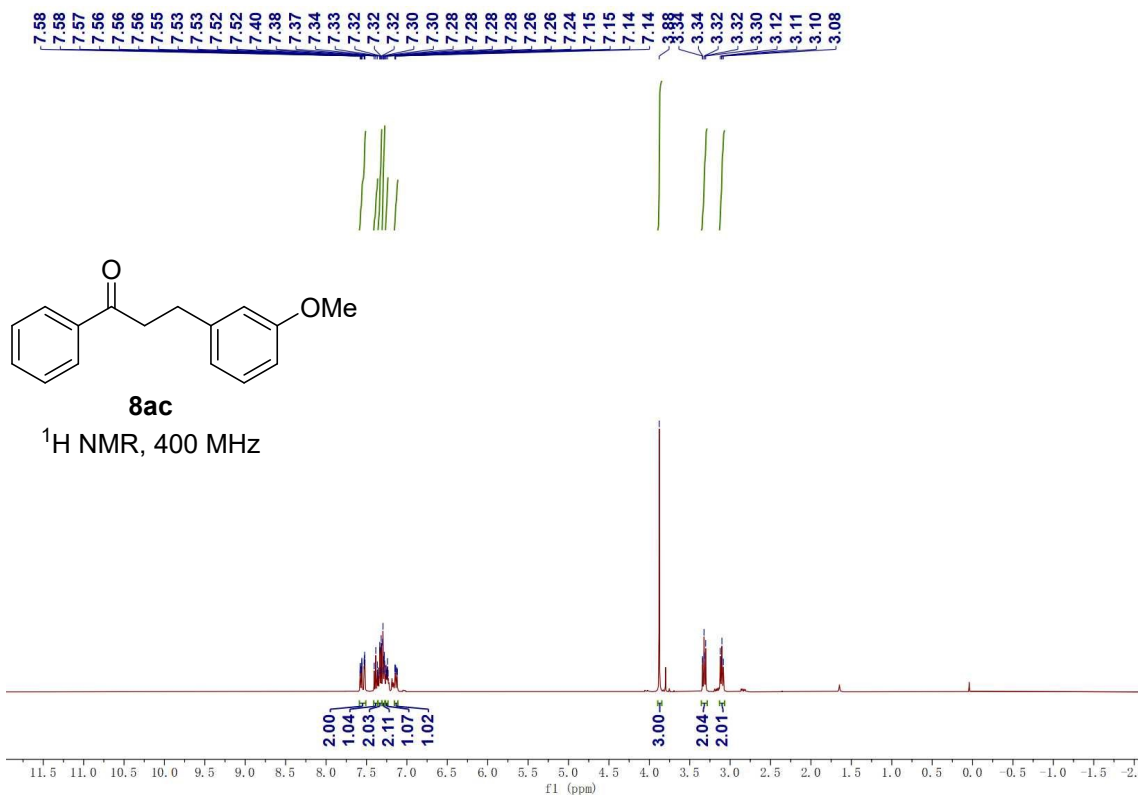

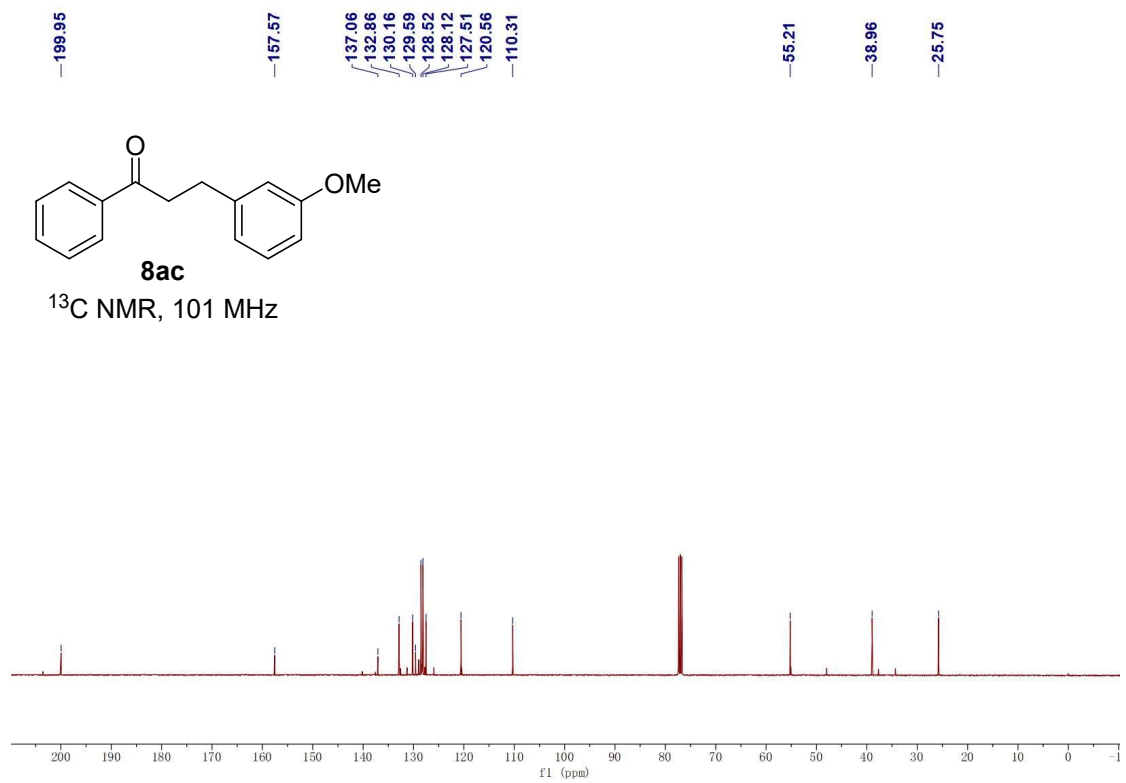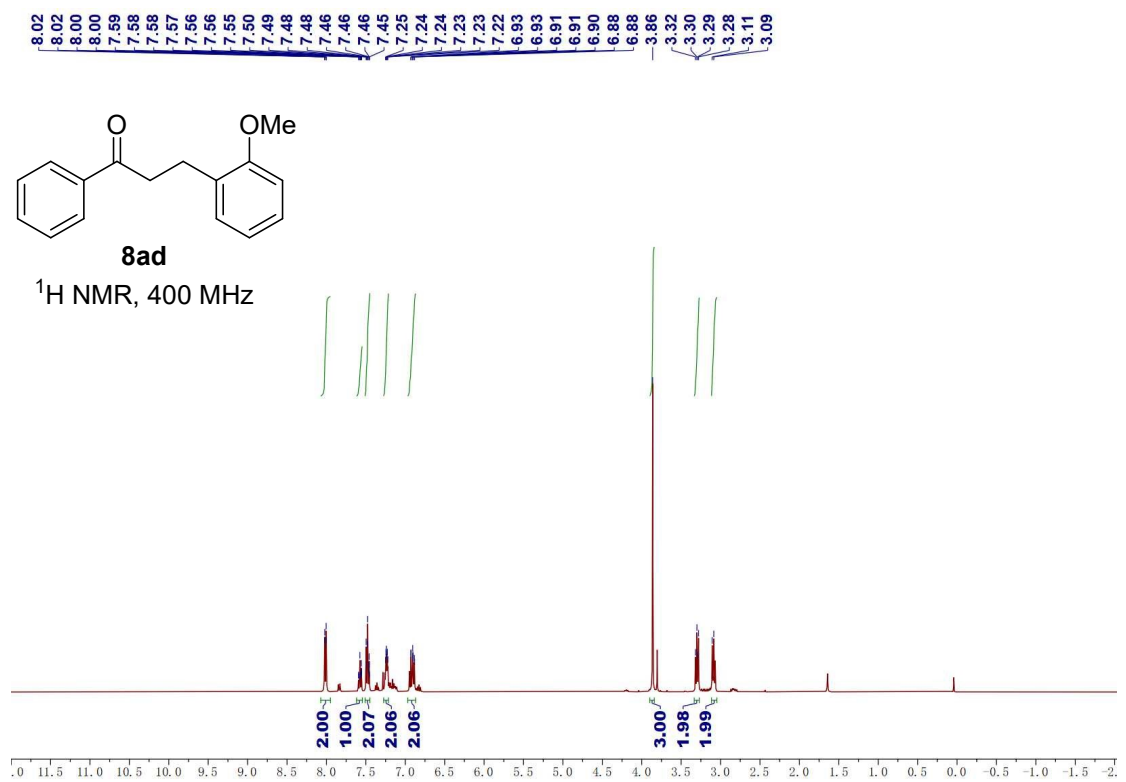

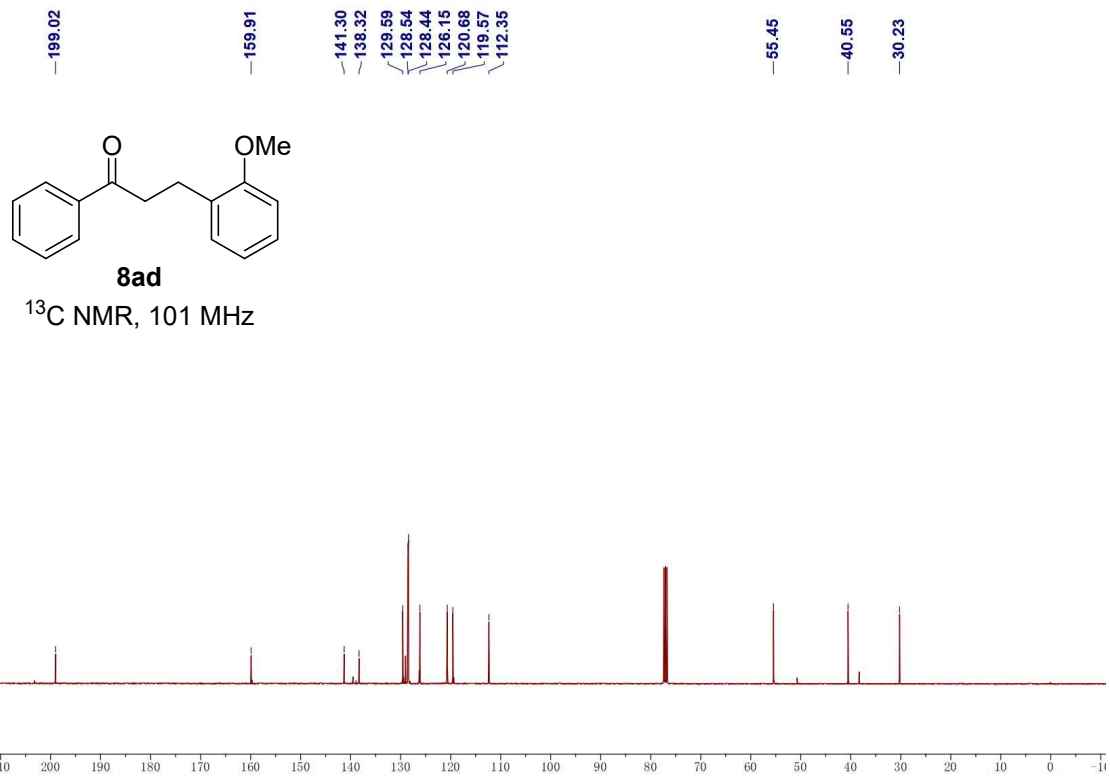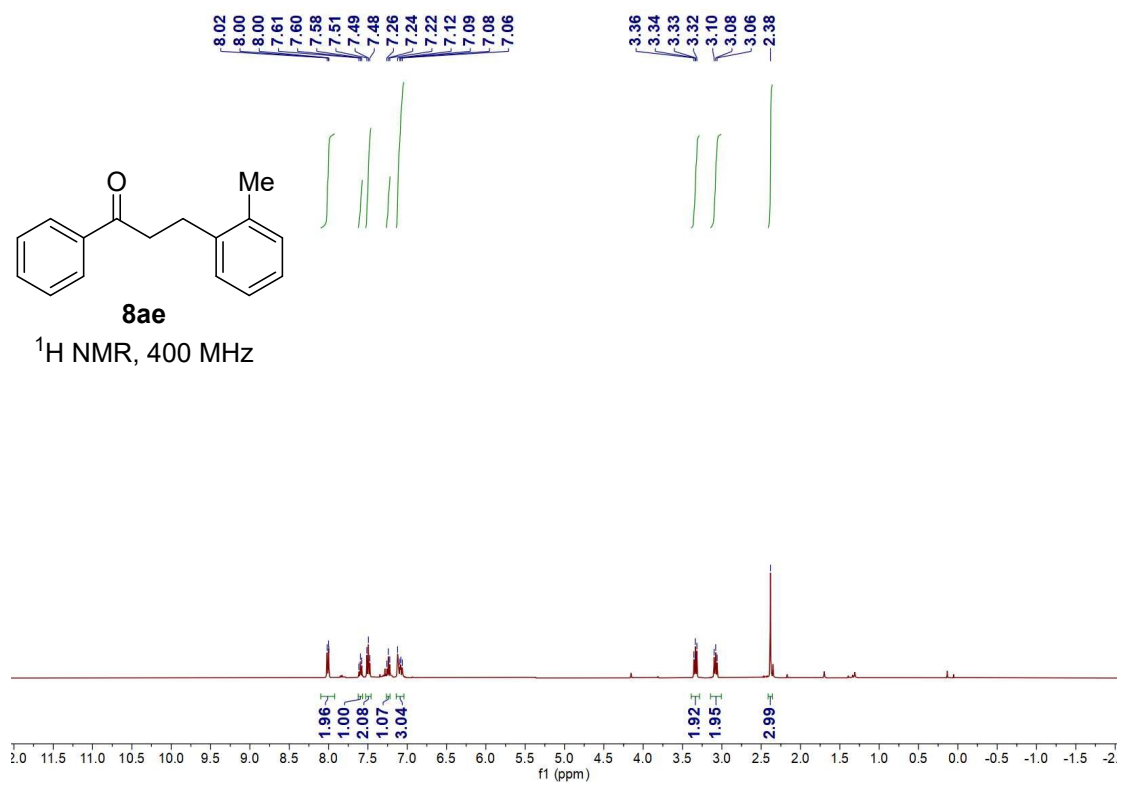

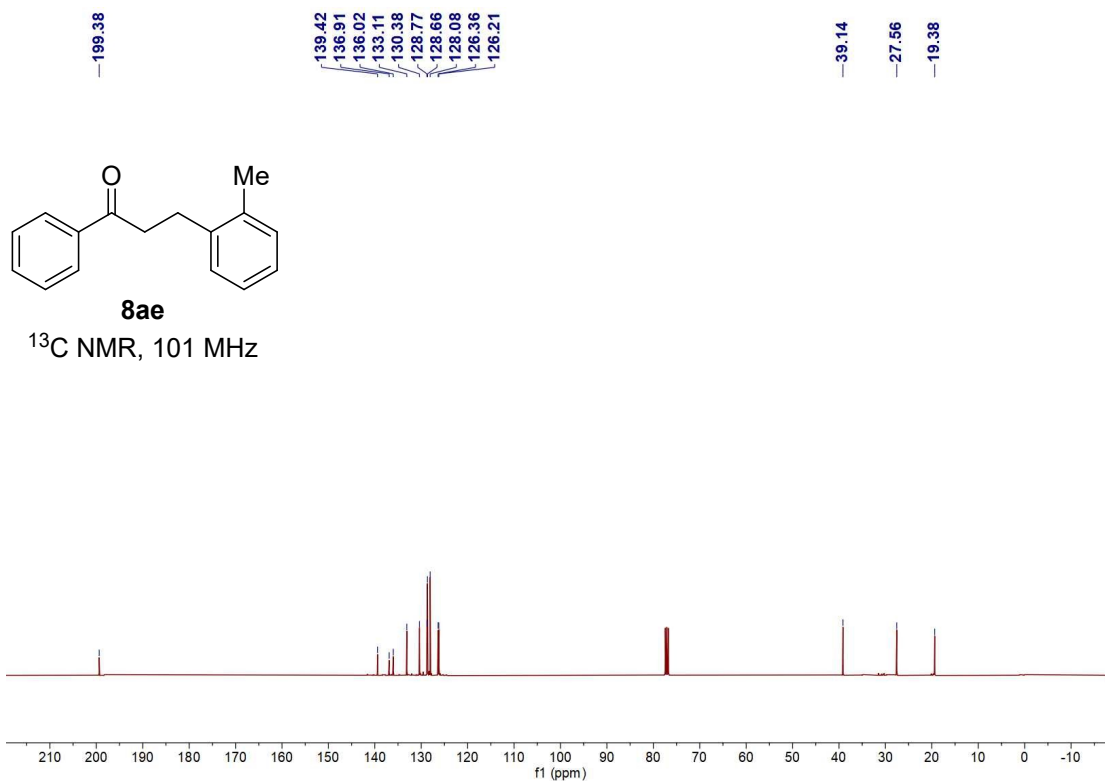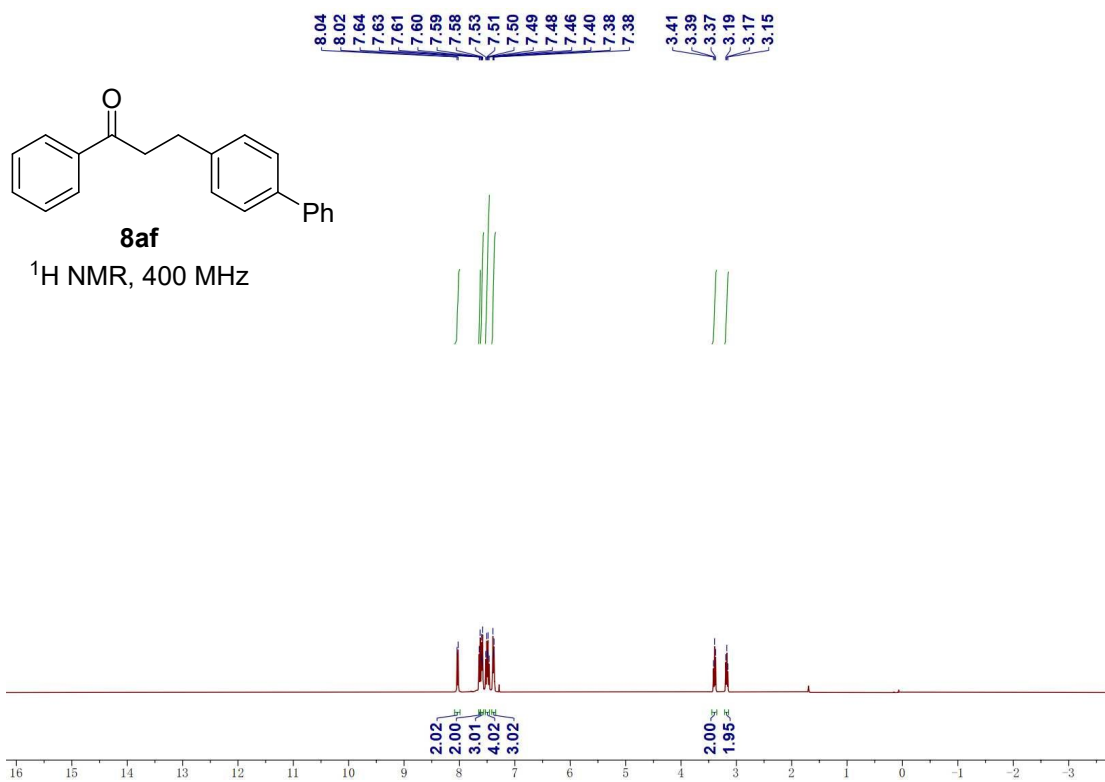

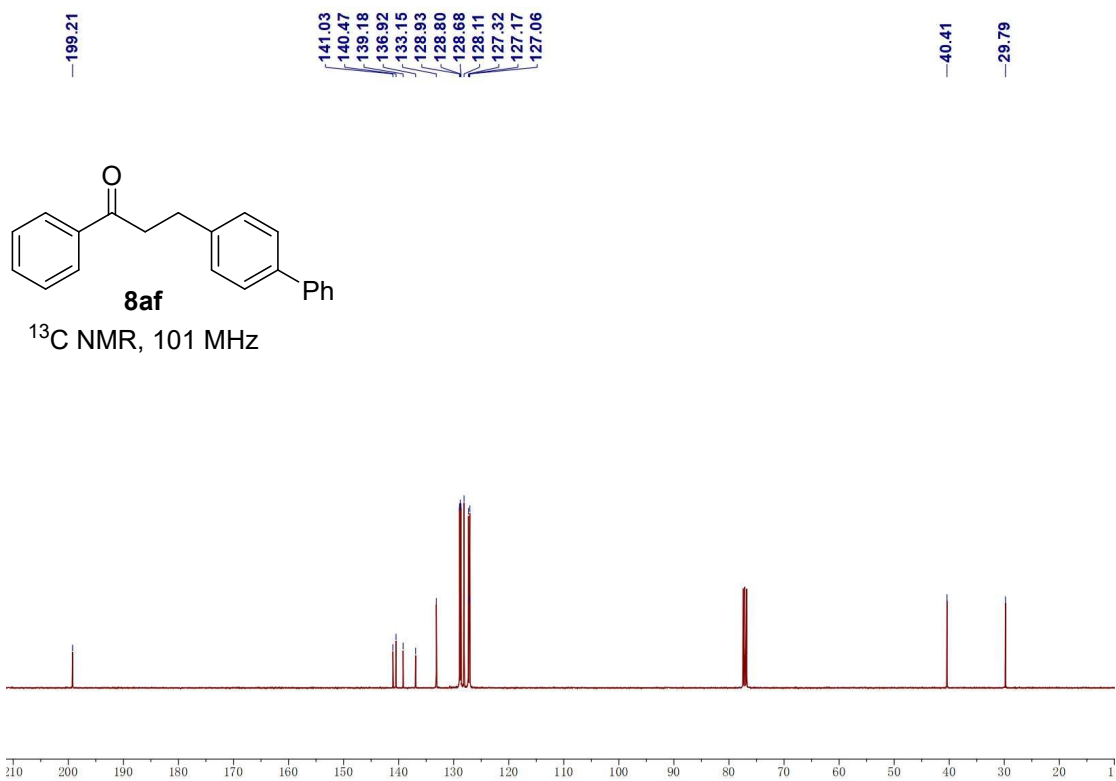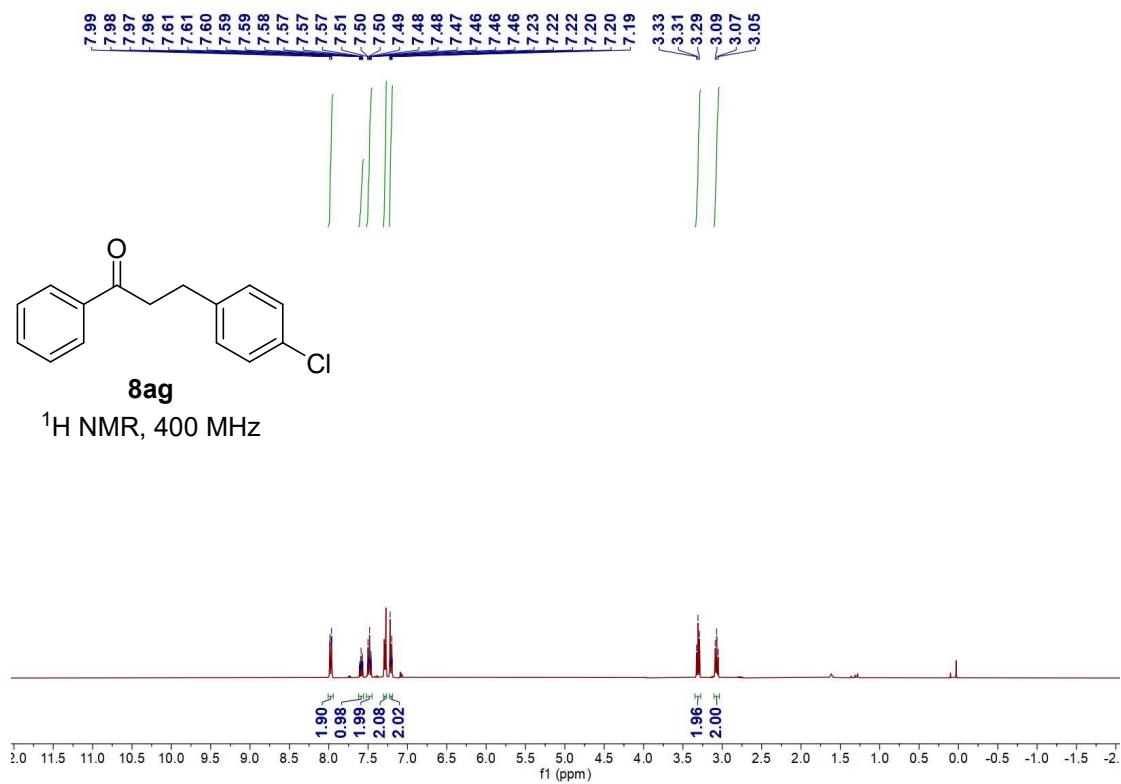

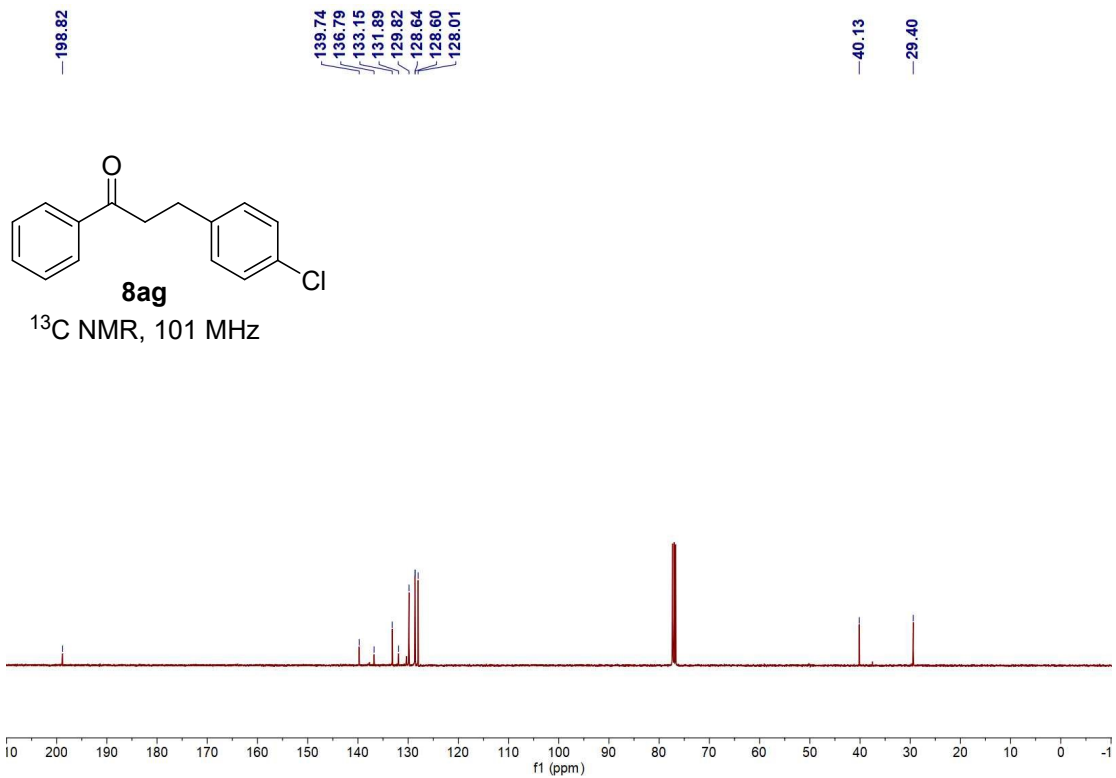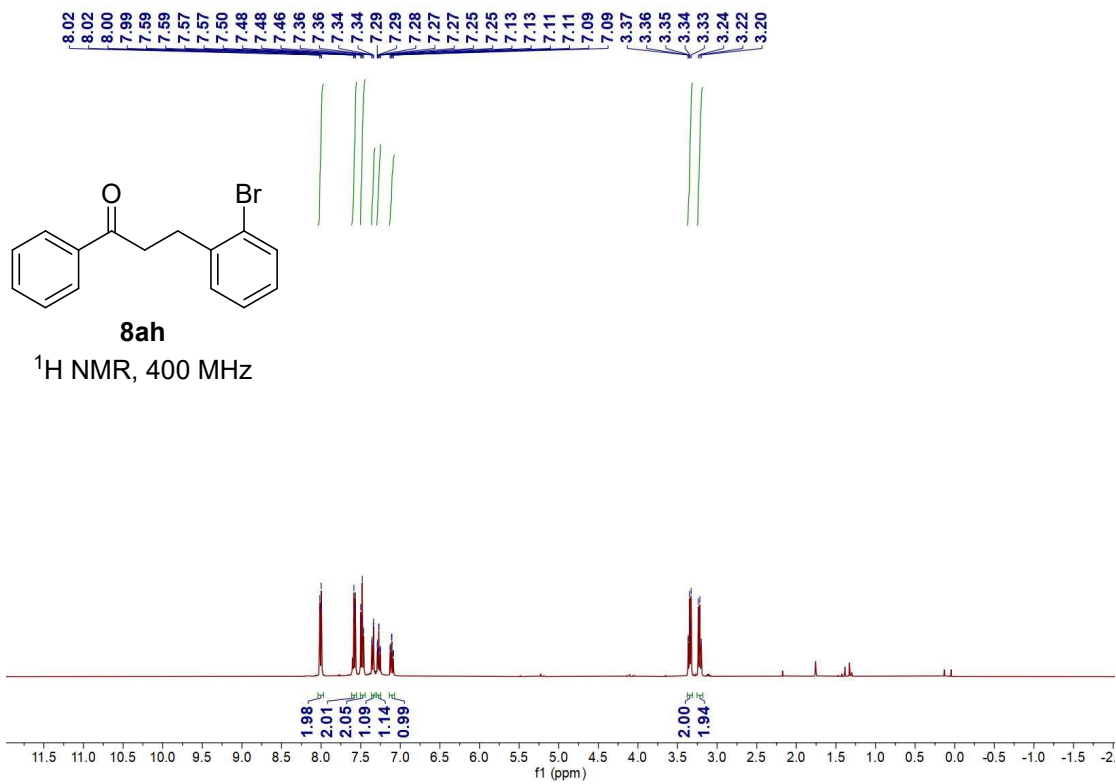

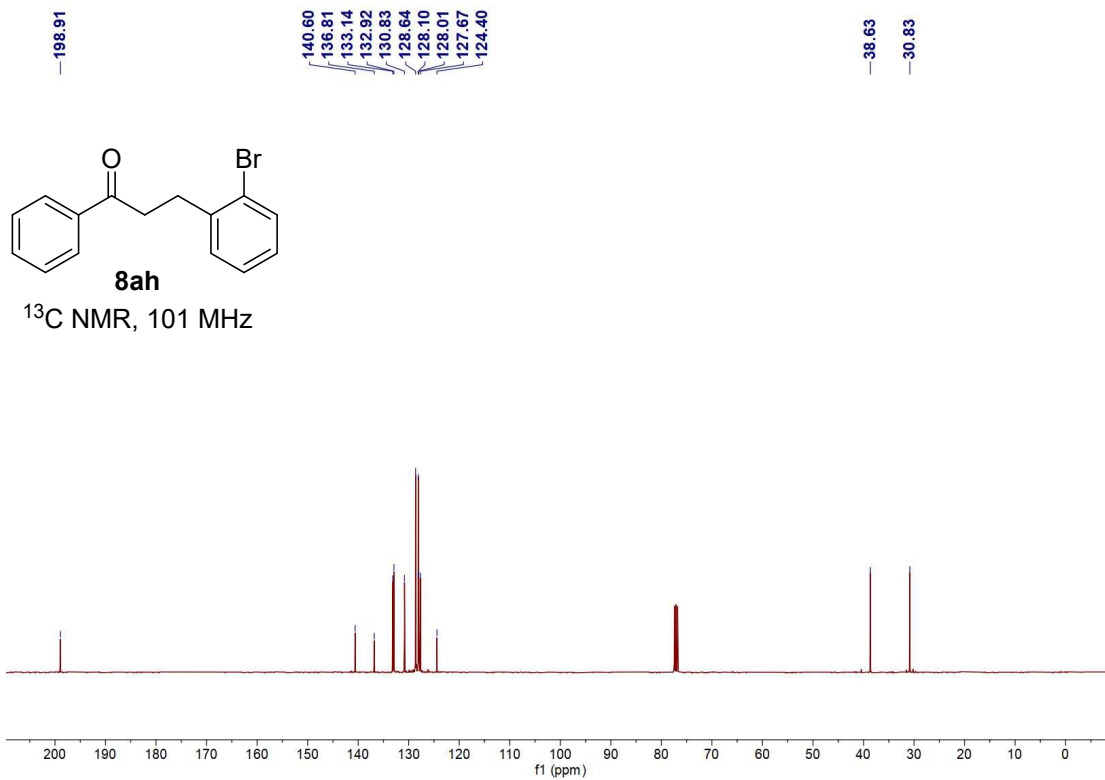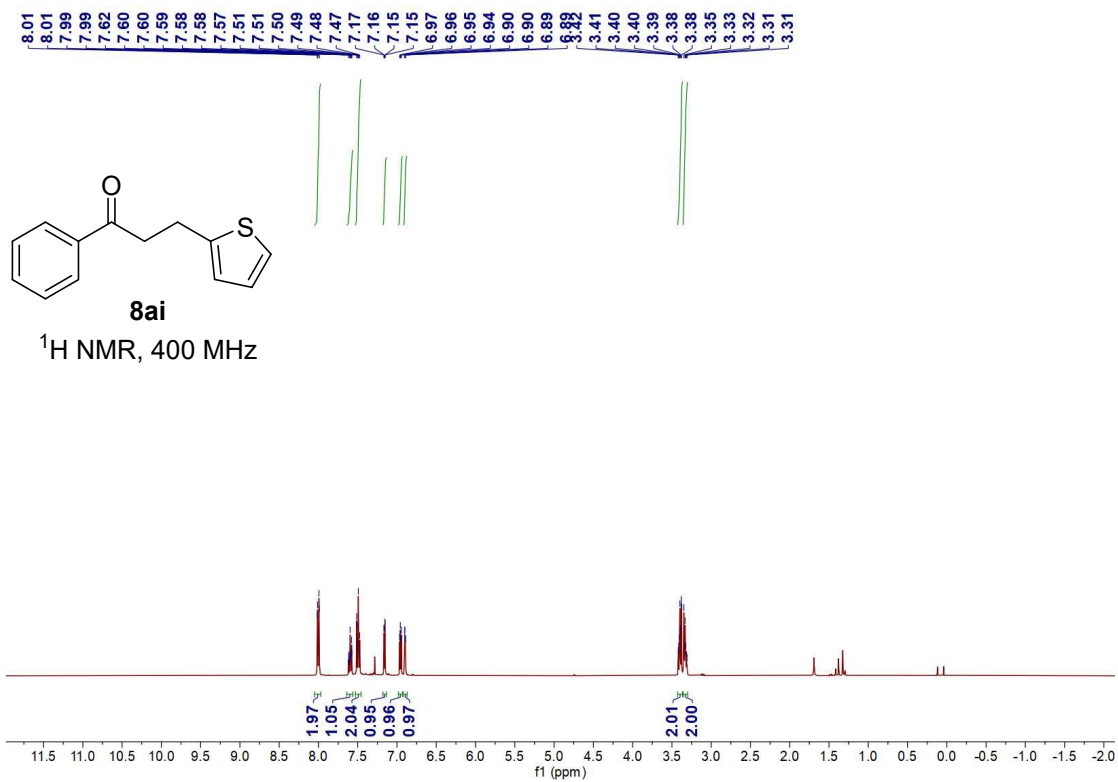

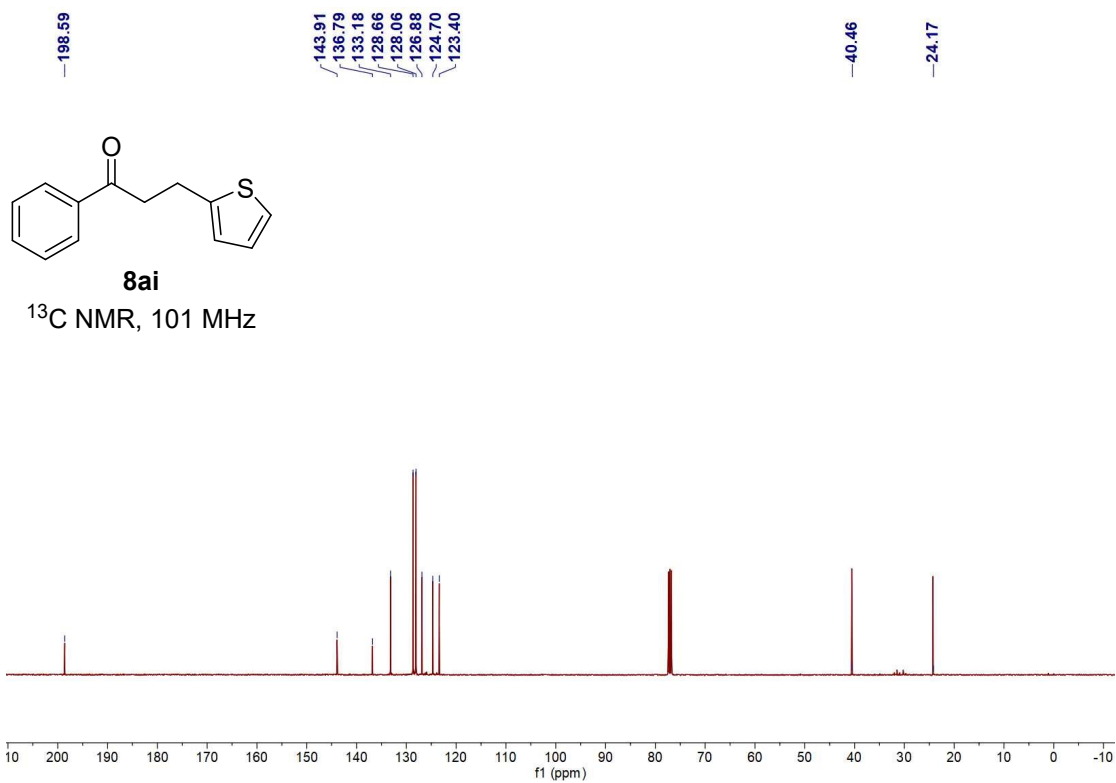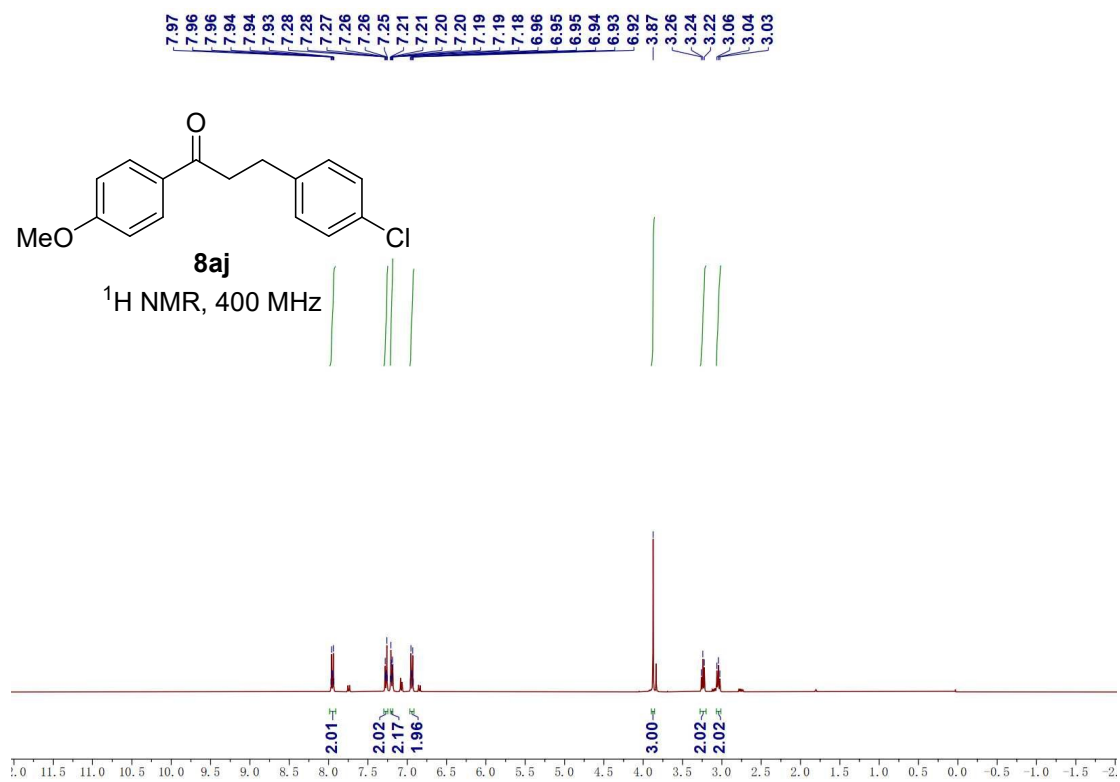



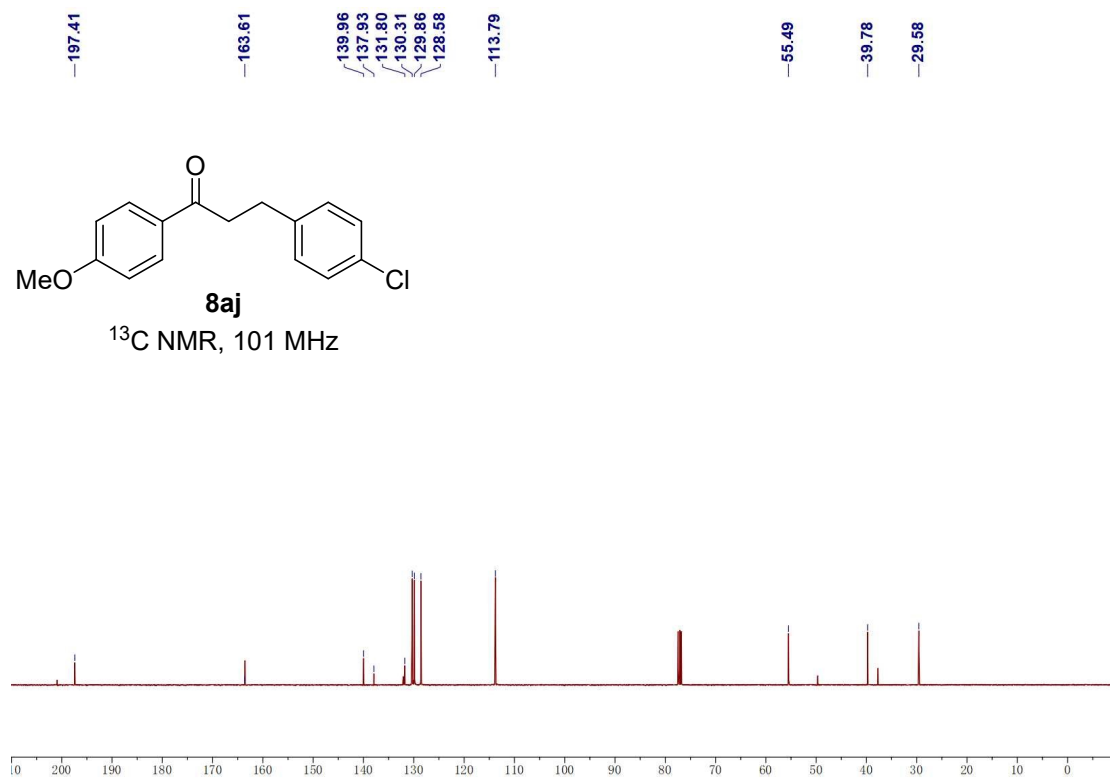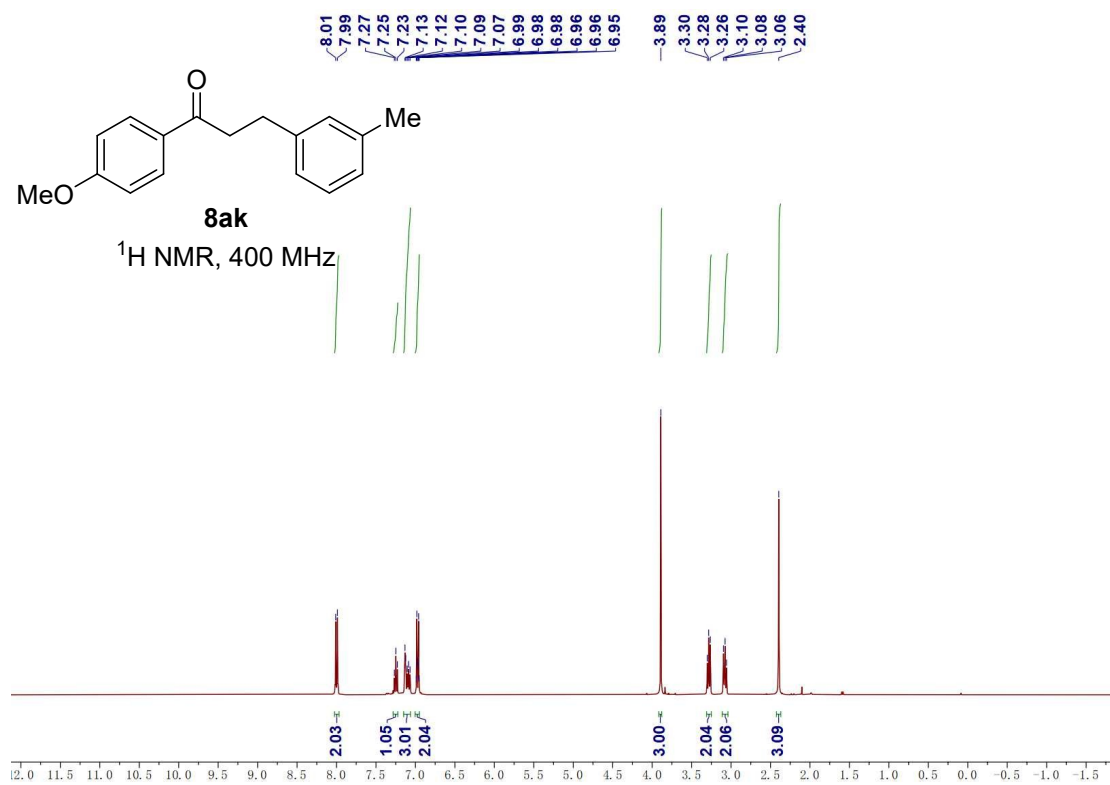

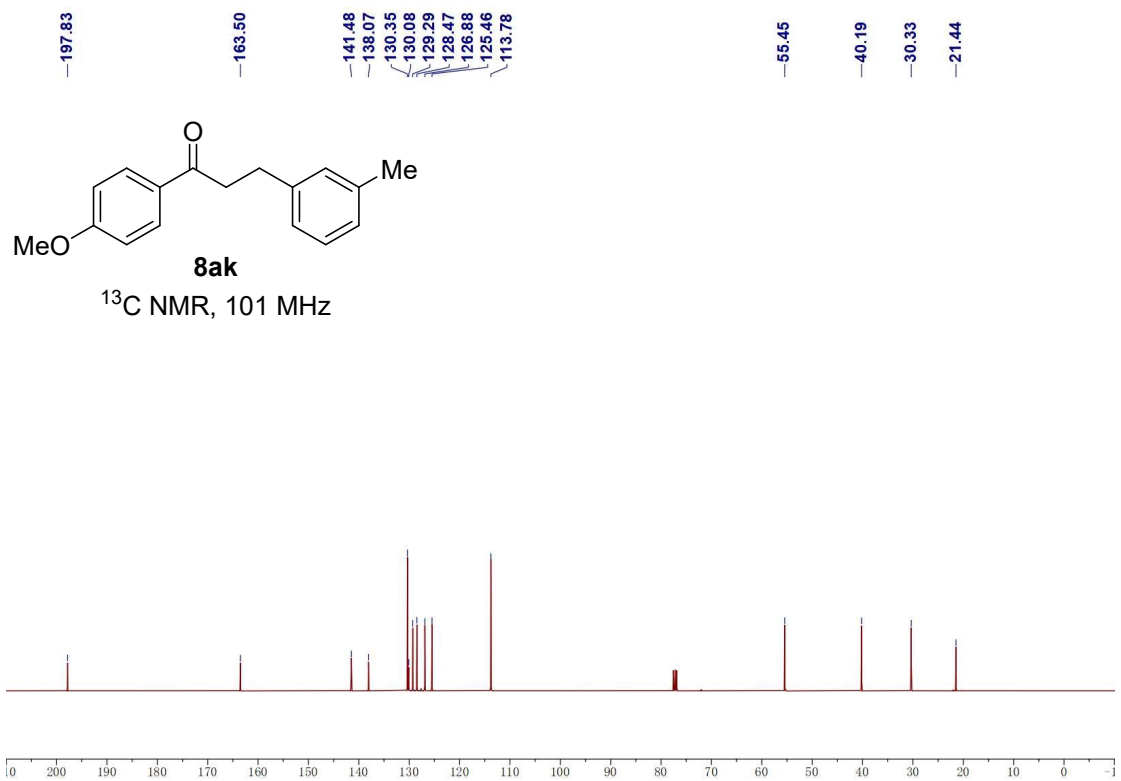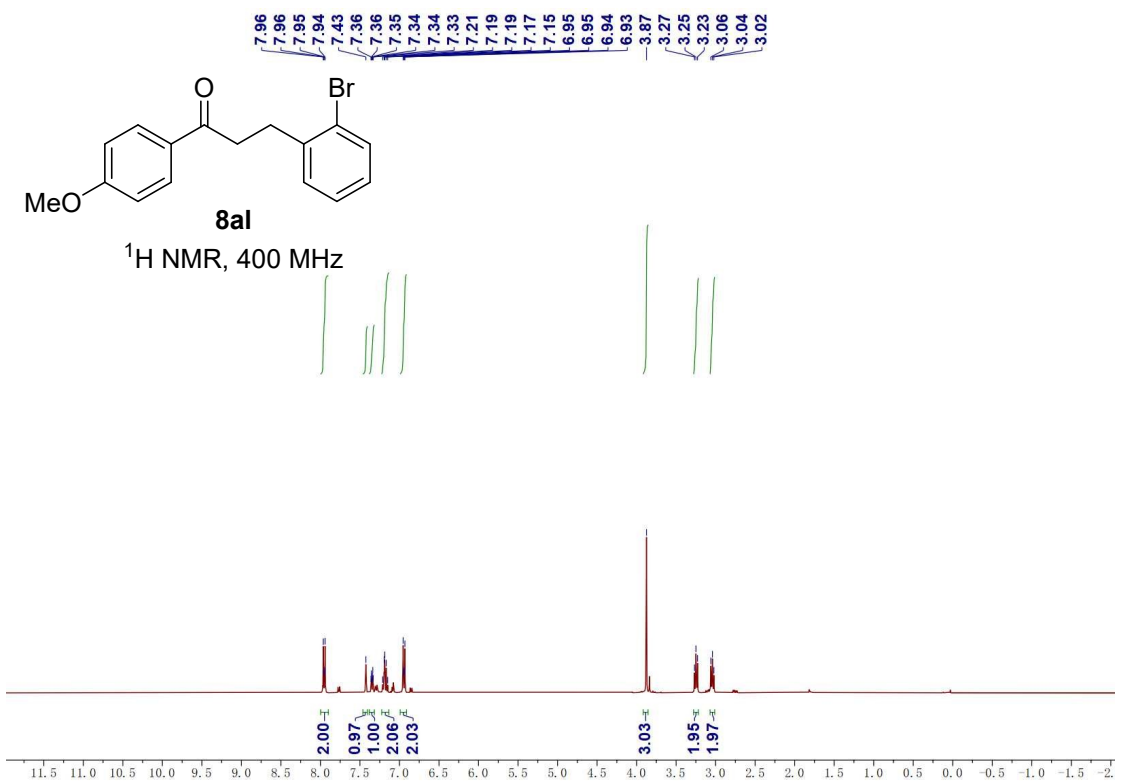

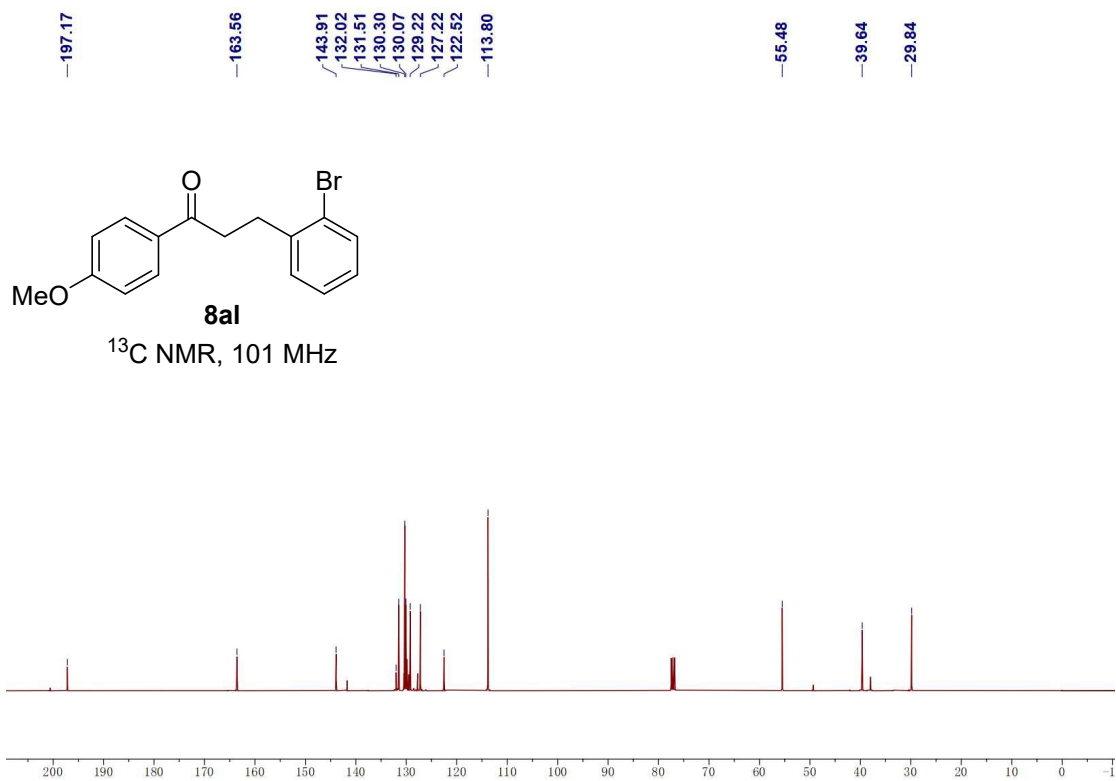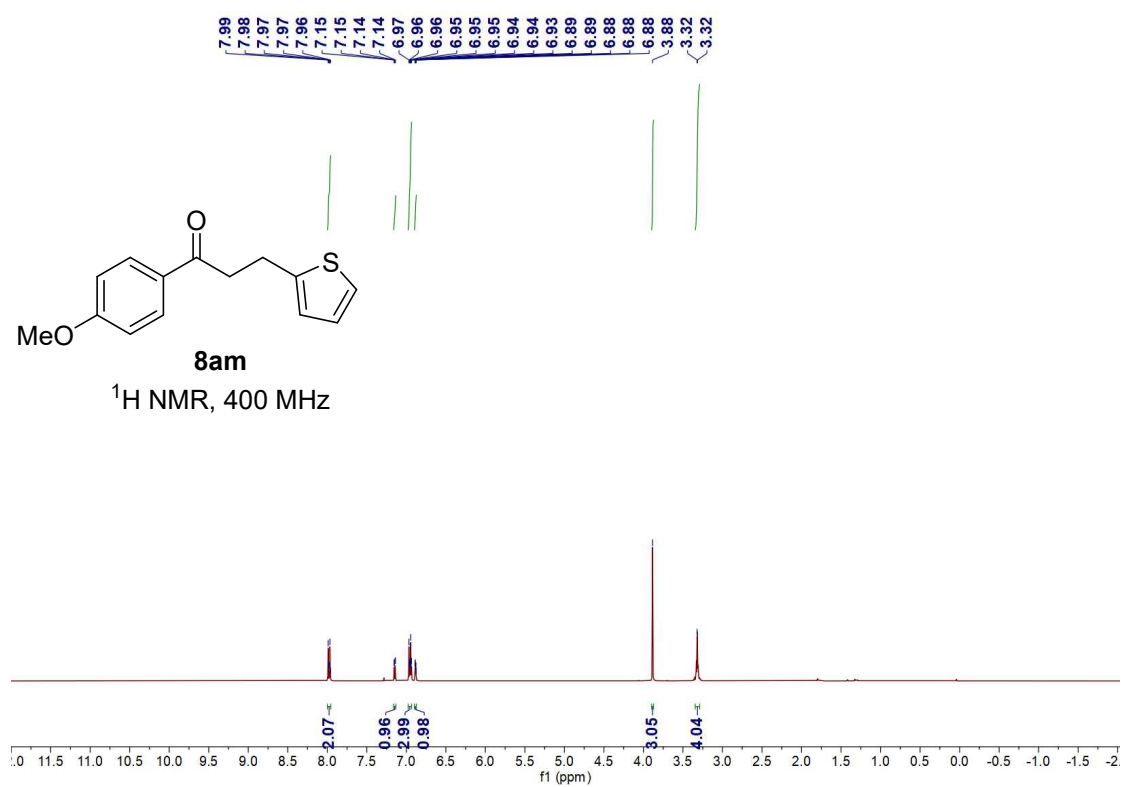

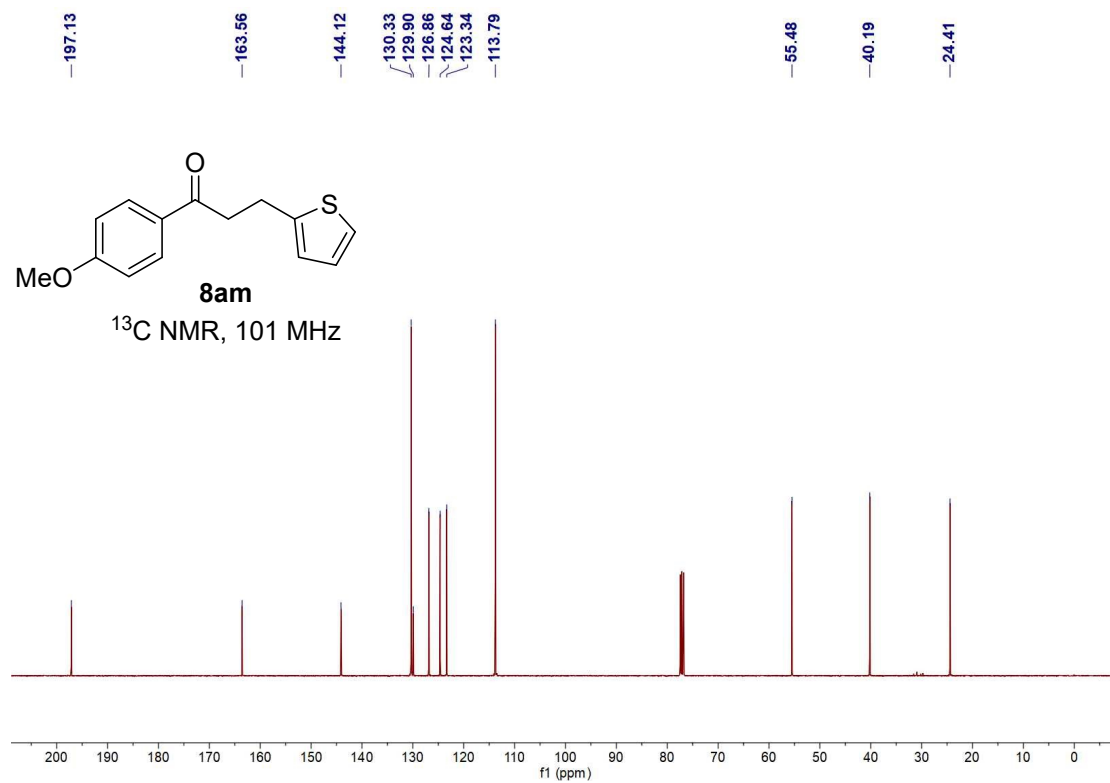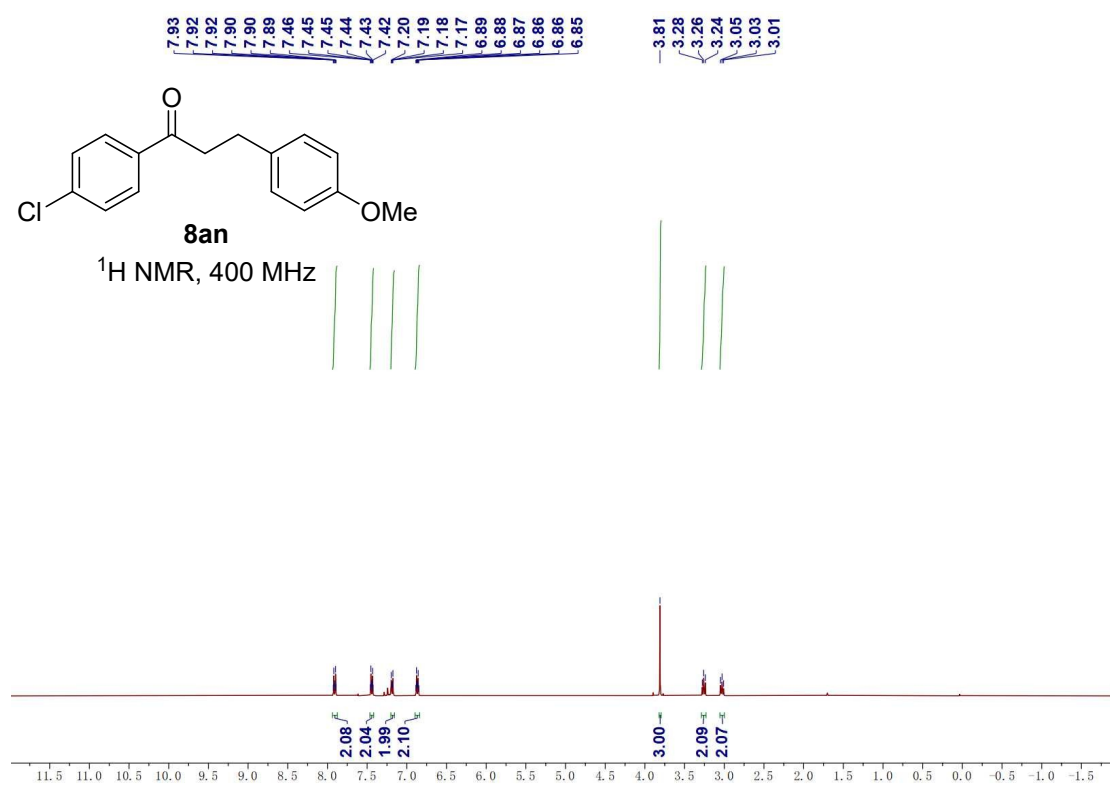

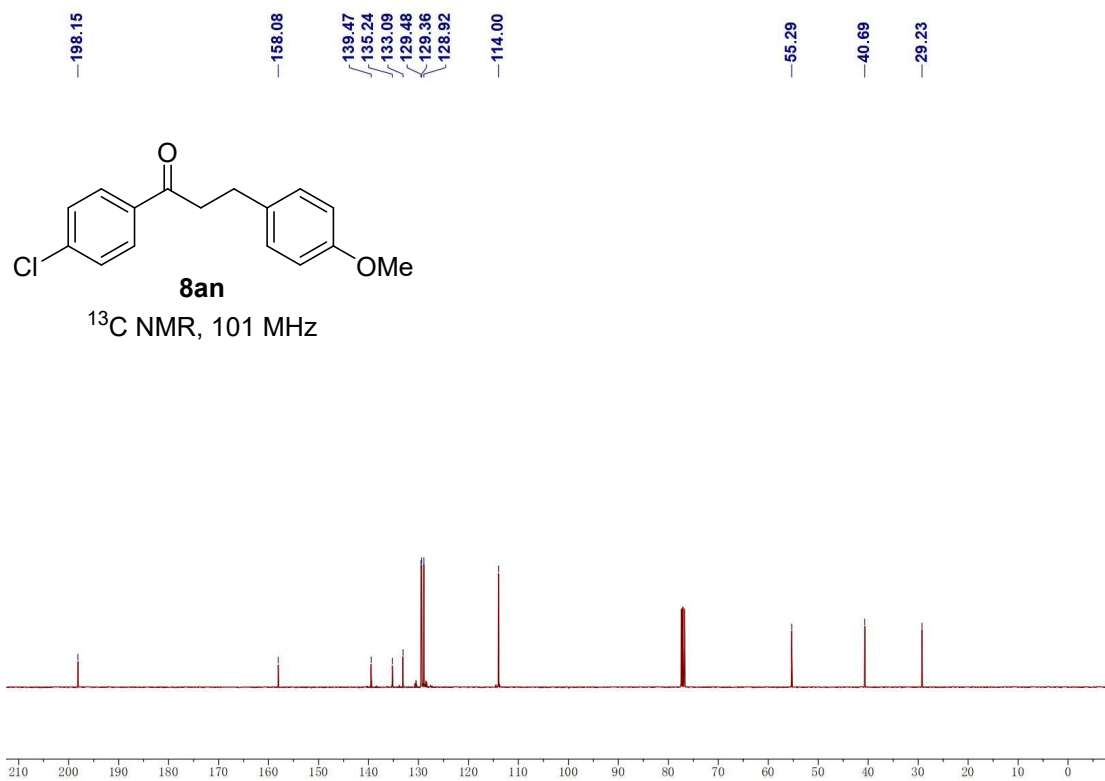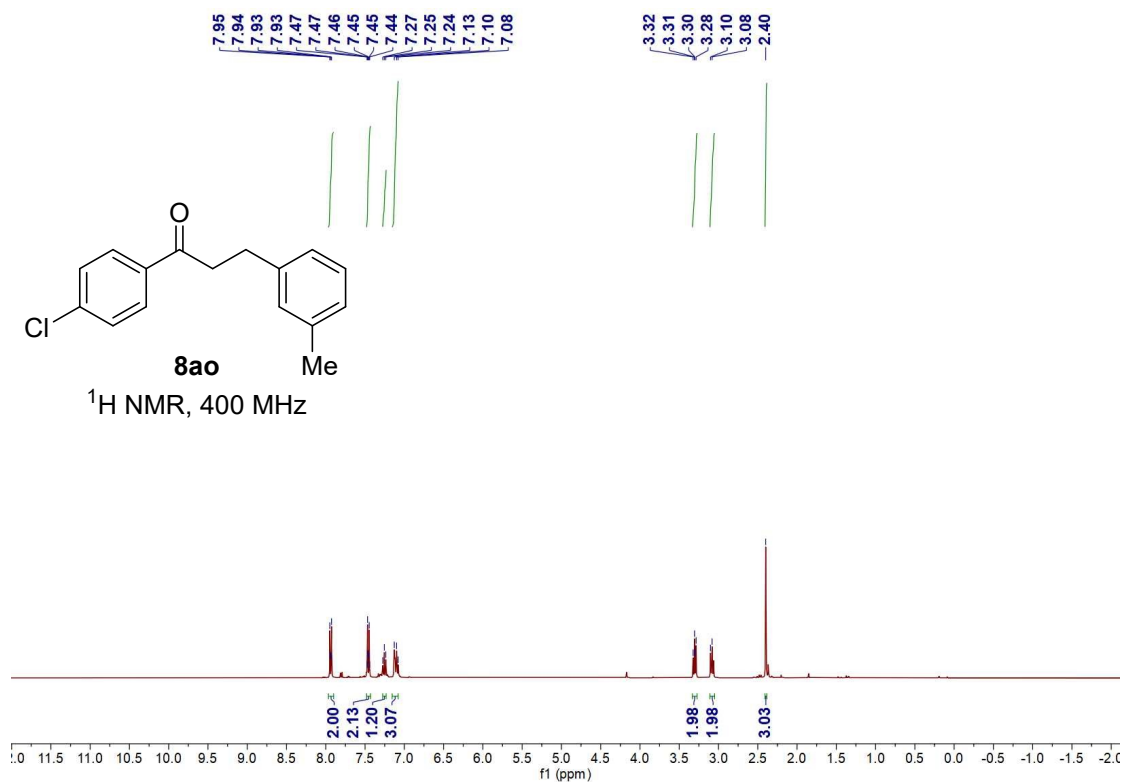

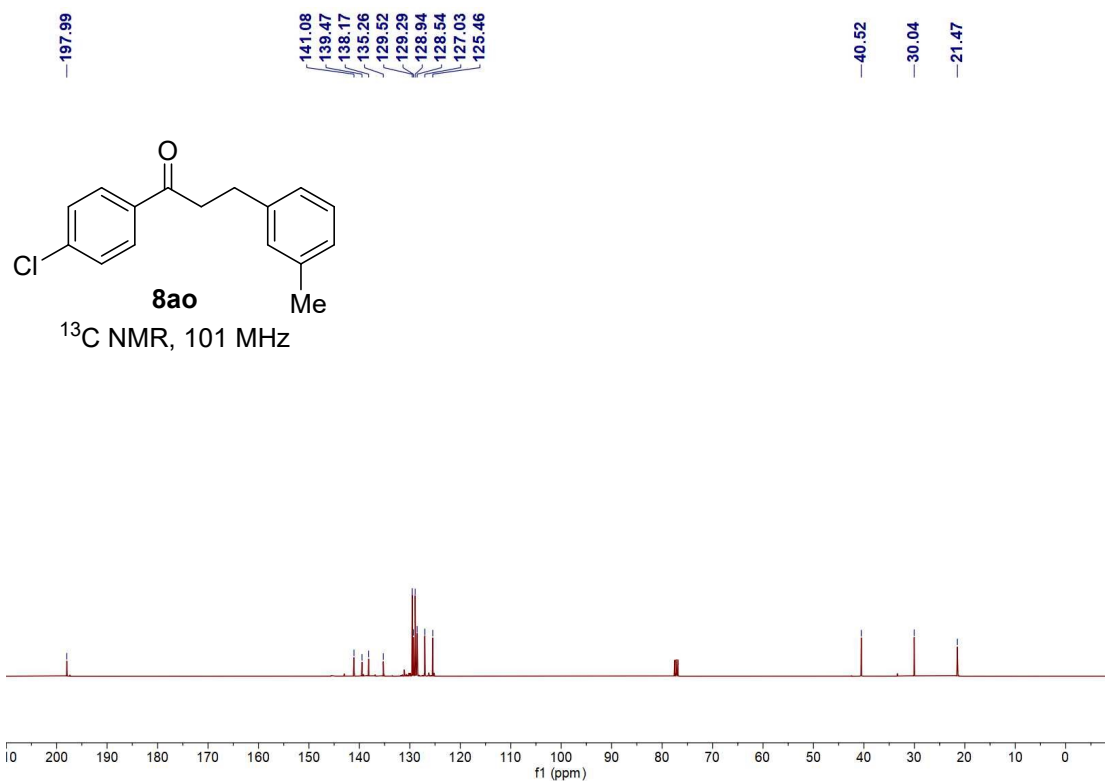

## 10. References

- (1) W. Du, P. Wu, Q. Wang and Z. Yu, Ruthenium (II) Complex Catalysts Bearing a Pyridyl-Based Benzimidazolyl–Benzotriazolyl Ligand for Transfer Hydrogenation of Ketones. *Organometallics*, 2013, **32**, 3083.
- (2) M. V. Rojo, L. Guetzoyan and I. R. Baxendale, A monolith immobilised iridium Cp\* catalyst for hydrogen transfer reactions under flow conditions. *Org. Biomol. Chem.*, 2015, **13**, 1768.
- (3) K. Chakrabarti, M. Maji and S. Kundu, Cooperative iridium complex-catalyzed synthesis of quinoxalines, benzimidazoles and quinazolines in water. *Green Chem.*, 2019, **21**, 1999.
- (4) M. J. Climent, A. Corma, J. C. Hernández, A. B. Hungría, S. Iborra and S. Martínez-Silvestre, Biomass into chemicals: One-pot two- and three-step synthesis of quinoxalines from biomass-derived glycols and 1,2-dinitrobenzene derivatives using supported gold nanoparticles as catalysts. *J. Catal.*, 2012, **292**, 118.
- (5) S. Shee, D. Panja and S. Kundu, Nickel-Catalyzed Direct Synthesis of Quinoxalines from 2-Nitroanilines and Vicinal Diols: Identifying Nature of the Active Catalyst. *J. Org. Chem.*, 2020, **85**, 2775.
- (6) F. Xie, M. Zhang, H. Jiang, M. Chen, W. Lv, A. Zheng and X. Jian, Efficient synthesis of quinoxalines from 2-nitroanilines and vicinal diols via a ruthenium-catalyzed hydrogen transfer strategy. *Green Chem.*, 2015, **17**, 279.
- (7) X. N. Cao, X. M. Wan, F. L. Yang, K. Li, X. Q. Hao, T. Shao, X. Zhu and M. P. Song, NNN Pincer Ru (II)-Complex-Catalyzed  $\alpha$ -Alkylation of Ketones with Alcohols. *J. Org. Chem.*, 2018, **83**, 3657.
- (8) W. Chang, X. Gong, S. Wang, L. P. Xiao and G. Song, Acceptorless dehydrogenation and dehydrogenative coupling of alcohols catalysed by protic NHC ruthenium complexes. *Org. Biomol. Chem.*, 2017, **15**, 3466.
- (9) A. Maji, A. Singh, N. Singh and K. Ghosh, Efficient Organoruthenium Catalysts for  $\alpha$ -Alkylation of Ketones and Amide with Alcohols: Synthesis of Quinolines *via* Hydrogen Borrowing Strategy and their Mechanistic Studies. *ChemCatChem*, 2020, **12**, 3108.
- (10) C. Seck, M. D. Mbaye, S. Coufourier, A. Lator, J.-F. Lohier, A. Poater, T. R. Ward, S. Gaillard and J.-L. Renaud, Alkylation of Ketones Catalyzed by Bifunctional Iron Complexes: From Mechanistic Understanding to Application. *ChemCatChem*, 2017, **9**, 4410.
- (11) A. Verma, S. Hazra, P. Dolui and A. J. Elias, Ruthenium-Catalyzed Synthesis of  $\alpha$ -Alkylated Ketones and Quinolines in an Aqueous Medium via a Hydrogen-Borrowing Strategy Using Ketones and Alcohols. *Asian J. Org. Chem.*, 2021, **10**, 626.
